# Supplementary material
Source: PubMed Central journal article supplement (PMC3737338)
Supplement: rna-10-803-s01.pdf [file rna-10-803-s01.pdf]

## **Supplemental Material to:**

**Ana Senčilo, Deborah Jacobs-Sera, Daniel A. Russell,  
Ching-Chung Ko, Charles A. Bowman, Nina S. Atanasova,  
Eija Österlund, Hanna M. Oksanen, Dennis H. Bamford,  
Grahm F. Hatfull, Elina Roine and Roger W. Hendrix**

**Snapshot of haloarchaeal tailed virus genomes**

**2013; 10(5)**

**<http://dx.doi.org/10.4161/rna.24045>**

**<http://www.landesbioscience.com/journals/rna/article/24045>**

## **Supplementary Data**

**For**

### **The Genomes of Haloarchaeal Tailed Viruses**

Sencilo A.<sup>1</sup>, Jacobs-Sera D.<sup>2</sup>, Russell DA.<sup>2</sup>, Ko C.-C.<sup>2</sup>, Atanasova NS.<sup>1</sup>, Österlund E.<sup>1</sup>,  
Oksanen HM.<sup>1</sup>, Bamford DH.<sup>1</sup>, Hatfull GF.<sup>2</sup>, Roine E.<sup>1</sup>, Hendrix RW.<sup>2</sup>

1. Department of Biosciences and Institute of Biotechnology, University of Helsinki, Helsinki, Finland.
2. Department of Biological Sciences, University of Pittsburgh, Pennsylvania, United States of America.

## **SUPPLEMENTARY RESULTS**

### **Provirus regions in euryarchaeal genomes**

Related archaeal proviruses were identified by first searching for homologues of terminase large subunit of our viruses in archaeal non-redundant protein sequence database. Then genome regions around the putative large terminase subunit genes were inspected for other putative viral genes. In this way four new proviral elements residing in the genomes of euryarchaea belonging to three different classes were identified (Table S1, Fig. S1).

In order to determine the borders of the proviral sequences, regions close to the integrase gene on one side and other putative proviral genes on the other side were analyzed for the direct repeats produced during virus integration into the host chromosome.<sup>1, 2</sup> Such direct repeats ranging in size from 16 to 55 bp were identified in three out of the four proviruses (Table S1).

Putative genes coding for virion structural and assembly proteins, proteins involved in DNA packaging and DNA and RNA metabolism were annotated in the genomes of proviruses (Fig. S1). Additional putative homologues of bacteriophage proteins have been identified. For instance, putative Mu gpG-like and Lambda head decoration D-like protein homologues have been found in haloarchaeal proviral regions from our studied set. P2 baseplate GpU-like and GpW-like protein homologues were predicted to be encoded by Aprof. Aprof also codes for late control GPD, P2 V-like protein and baseplate assembly J-like protein putative homologues, which have been identified in HGTV-1 too. Thus, Aprof seems to encode a full set of P2 baseplate protein homologues (Fig. S2).

Arrangements of haloarchaeal proviral regions are similar to earlier described proviruses (Krupovic et al., 2010). *M. okinawensis* proviral region is organized in a similar way as *Methanocaldococcus vulcanius* M7 provirus Mvul-Pro1.<sup>2</sup> Its genes coding for structural and DNA packaging proteins are encoded by two separate gene clusters on opposite strands. One of the clusters codes for terminase large subunit, portal-Mu gpF fusion protein and the other one codes for putative minor and major capsid proteins.

### **Putative prohead proteases in studied haloarchaeal tailed viruses**

Putative prohead proteases have been identified viruses HCTV-2, HHTV-2, HGTV-1, HRTV-5, HRTV-7 and HRTV-8. Predictions were based either on similarity to earlier identified prohead proteases<sup>2</sup> or based on the position of the encoding gene, conservation of

secondary structure and a putative catalytic triad.<sup>3,4</sup> All of our analyzed putative prohead proteases appear to have a conserved catalytic triad (aspartate, histidine, serine), except for that of HRTV-8 virus. Instead of aspartate HRTV-8 prohead protease has glutamate at a corresponding position, despite over 90% of shared amino acids with putative prohead protease of HF2 virus.<sup>2</sup>

### **Proteins with Zeta toxin-like domains in HCTV-1 and HCTV-5 viruses.**

HCTV-1 and HCTV-5 viruses were predicted to encode protein with Zeta-toxin like domain in a genome region coding for capsid structural proteins. In bacteria Zeta toxin was shown to impair peptidoglycan synthesis by phosphorylating peptidoglycan precursor UDP-N-acetylglucosamine (UNAG).<sup>5,6</sup> Bacterial Zeta toxins have two highly conserved motifs – one for ATP binding (Walker A motif) and the other one for UNAG binding.<sup>5,6</sup> Zeta toxin-like domains predicted in HCTV-1 and HCTV-5 proteins have essentially the same secondary structure as bacterial ones with recognizable Walker A motif, but lacking key residues essential for contact with UNAG. In both HCTV-1 and HCTV-5 putative Zeta toxin-like domain is an N-terminal part of an approximately 1200 amino acid protein. In addition to Zeta toxin-like domain, HCTV-5 protein is predicted to have a ParB-like nuclease domain in the central part. HCTV-1 protein lacks this region.

### **Cluster of QueCDEF genes encoded by HCTV-1 and HCTV-5 viruses.**

Both bacteria and archaea share the first step of the queuosine biosynthesis, during which GTP is converted into 7-cyano-7-deazaguanine (Pre-Q<sub>0</sub>) with the help of three enzymes – QueC, QueD and QueE. All of these enzymes are predicted to be encoded in HCTV-1 and HCTV-5 genomes. Next step in archaeosine synthesis involves Pre-Q<sub>0</sub> insertion into tRNA and conversion to archaeosine by addition of ammonia by yet unknown enzyme.<sup>7</sup> In bacteria, Pre-Q<sub>0</sub> is reduced to 7-aminomethyl-7-deazaguanine (pre-Q<sub>1</sub>) prior to its addition to tRNA.<sup>7</sup> This step is catalyzed by the enzyme QueF, which is also predicted to be encoded in HCTV-1 and HCTV-5 genomes. Thus, HCTV-1 and HCTV-5 seem to encode bacterial queuosine synthesis enzymes.

### **Ribozymes in HRTV-5 and HRTV-8 genomes.**

HRTV-5 ribozyme at 65998-66064 nt has identical catalytic site residues as HF1 and HF2 ribozymes, whereas T3 residue is missing in HRTV-8 variant at 63409-63474 nt (Fig. S3). Differently from the above mentioned hammerhead ribozymes, HRTV-8 ribozyme at 65506-

65572 nt has canonical active site residues C3, U4, G5, A6 without 2, 2a, 2b insertion (Fig. S3). It has been shown that 2, 2a, 2b insertion in HF2 ribozyme destabilizes catalytic site thereby decreasing ribozyme activity.<sup>8</sup> The stability and consequent activity of restored upon increasing Mg<sup>2+</sup> concentrations.<sup>8</sup> It was suggested that 2, 2a, 2b insertion acts to regulate ribozyme activity in a salt-dependent manner.<sup>8</sup> Since HRTV-8 has both variants of hammerhead ribozyme, it may have both Mg<sup>2+</sup>-dependent and independent activities.

### **HNH homing endonucleases in HCTV-5 genome.**

Based on similarity at the amino acid level HCTV-5 HNH homing endonucleases can be divided into three groups. The first group includes ORF 89, 104, 106, 108 and 111 products. The second group is comprised of ORFs 42, 49 and 56, whereas the third one includes ORFs 22 and 77. In order to distinguish the most conserved amino acids, we have done the alignments of HCTV-5 HNH HEs with additional related HNH sequences from non-redundant protein database (Fig. S4). Sequence logos of the alignments (Fig. S5) showed that in addition to the conserved HNH motif, group I members have two conserved cysteine dyads (Cys dyads). In the second Cys dyad of ORF89 histidine substitutes for one of the cysteines residues. The same substitution has been observed in other HNHs.<sup>9</sup> It was suggested that it may not be functionally detrimental and histidine may still act in zinc ion binding<sup>9</sup>. The II group members have one Cys dyad with less usual 4 nucleotide insertion between the two cysteines. The third group lacks cysteine dyads. Similar combinations of conserved HNH motif and cysteine dyads have been described before for other HNH homing endonucleases.<sup>9</sup>

### **REFERENCES**

1. Casjens S. Prophages and bacterial genomics: what have we learned so far? *Mol Microbiol* 2003; 49:277-300.
2. Krupović M, Forterre P, Bamford DH. Comparative analysis of the mosaic genomes of tailed archaeal viruses and proviruses suggests common themes for virion architecture and assembly with tailed viruses of bacteria. *J Mol Biol* 2010; 397:144-60.
3. Cheng H, Shen N, Pei J, Grishin NV. Double-stranded DNA bacteriophage prohead protease is homologous to herpesvirus protease. *Protein science : a publication of the Protein Society* 2004; 13:2260-9.
4. Chang JR, Spilman MS, Rodenburg CM, Dokland T. Functional domains of the bacteriophage P2 scaffolding protein: identification of residues involved in assembly and protease activity. *Virology* 2009; 384:144-50.
5. Mutschler H, Gebhardt M, Shoeman RL, Meinhart A. A novel mechanism of programmed cell death in bacteria by toxin-antitoxin systems corrupts peptidoglycan synthesis. *PLoS Biol* 2011; 9:e1001033.

6. Mutschler H, Meinhart A. epsilon/zeta systems: their role in resistance, virulence, and their potential for antibiotic development. *J Mol Med (Berl)* 2011; 89:1183-94.
7. Phillips G, El Yacoubi B, Lyons B, Alvarez S, Iwata-Reuyl D, de Crécy-Lagard V. Biosynthesis of 7-deazaguanosine-modified tRNA nucleosides: a new role for GTP cyclohydrolase I. *J Bacteriol* 2008; 190:7876-84.
8. Perreault J, Weinberg Z, Roth A, Popescu O, Chartrand P, Ferbeyre G, et al. Identification of hammerhead ribozymes in all domains of life reveals novel structural variations. *PLoS Comput Biol* 2011; 7:e1002031.
9. Mehta P, Katta K, Krishnaswamy S. HNH family subclassification leads to identification of commonality in the His-Me endonuclease superfamily. *Protein science : a publication of the Protein Society* 2004; 13:295-300.

## SUPPLEMENTARY TABLES

**Table S1.** Properties of proviral regions

| Proviral element | Host (GenBank accession number)                                        | attR (bp) or approximate right hand region coordinates | attL (bp) or approximate left hand region coordinates | Proviral region size (bp) | Integration site |
|------------------|------------------------------------------------------------------------|--------------------------------------------------------|-------------------------------------------------------|---------------------------|------------------|
| Ngreg            | <i>Natronobacterium gregoryi</i> SP2 ,ctg168 contig ( NZ_AGIM01000003) | 43418-43433                                            | 872-887                                               | 42,621                    | tRNA-Cys         |
| Aprof            | <i>Archaeoglobus profundus</i> DSM 5631 ( NC_013741)                   | 1262636-1262687                                        | 1296263-1296314                                       | 33,678                    | Intragenic       |
| Hjeo             | <i>Halalkalicoccus jeotgali</i> B3 ( NC_014297)                        | 1055217                                                | 1001828                                               | ND                        | ND               |
| Mokin            | <i>Methanothermococcus okinawensis</i> IH1 ( NC_015636)                | 312061-312115                                          | 340975-341029                                         | 28,968                    | Intergenic       |

**Table S2.** Putative frameshifts in predicted tail assembly factor genes

| Virus  | Frameshift type | Frameshift position (nt) | Slippery sequence |
|--------|-----------------|--------------------------|-------------------|
| HCTV-1 | -1              | 83350-83356              | GGGAAAC           |
| HCTV-2 | -1              | 24643-24649              | AAAAAAC           |
| HCTV-5 | -1              | 83612-83618              | GGGAAAG           |

**Table S3.** HCTV-1 genome features.

| <b>ORF number</b> | <b>Direction</b> | <b>Start</b> | <b>Stop</b> | <b>Length (nt)</b> | <b>Function</b>                  |
|-------------------|------------------|--------------|-------------|--------------------|----------------------------------|
| 1                 | F                | 120          | 464         | 345                |                                  |
| 2                 | R                | 891          | 1283        | 393                |                                  |
| 3                 | R                | 1267         | 1512        | 246                |                                  |
| 4                 | R                | 1502         | 1765        | 264                |                                  |
| 5                 | R                | 1808         | 2116        | 309                |                                  |
| 6                 | R                | 2182         | 2445        | 264                |                                  |
| 7                 | R                | 2445         | 2690        | 246                |                                  |
| 8                 | R                | 2690         | 3052        | 363                |                                  |
| 9                 | R                | 3045         | 3161        | 117                |                                  |
| 10                | R                | 3154         | 3480        | 327                |                                  |
| 11                | R                | 3532         | 3717        | 186                |                                  |
| 12                | R                | 3714         | 3968        | 255                |                                  |
| 13                | R                | 3961         | 4158        | 198                |                                  |
| 14                | R                | 4158         | 4643        | 486                |                                  |
| 15                | R                | 4732         | 5013        | 282                |                                  |
| 16                | R                | 5080         | 5217        | 138                |                                  |
| 17                | R                | 5210         | 5398        | 189                |                                  |
| 18                | R                | 5466         | 5717        | 252                |                                  |
| 19                | R                | 5710         | 5952        | 243                |                                  |
| 20                | R                | 5945         | 6142        | 198                |                                  |
| 21                | R                | 6139         | 6333        | 195                |                                  |
| 22                | F                | 6409         | 6738        | 330                |                                  |
| 23                | F                | 6722         | 6934        | 213                |                                  |
| 24                | F                | 7047         | 7421        | 375                |                                  |
| 25                | F                | 7418         | 7810        | 393                |                                  |
| 26                | F                | 7803         | 10751       | 2949               | Ribonucleotide reductase         |
| 27                | F                | 10799        | 11338       | 540                |                                  |
| 28                | F                | 11335        | 11721       | 387                |                                  |
| 29                | F                | 11824        | 13005       | 1182               |                                  |
| 30                | F                | 13114        | 14388       | 1275               |                                  |
| 31                | F                | 14526        | 14936       | 411                |                                  |
| 32                | F                | 14936        | 15073       | 138                |                                  |
| 33                | F                | 15070        | 15312       | 243                |                                  |
| 34                | F                | 15397        | 16626       | 1230               | DNA polymerase II, small subunit |
| 35                | F                | 16632        | 17000       | 369                |                                  |
| 36                | R                | 17041        | 17637       | 597                |                                  |
| 37                | R                | 17634        | 17843       | 210                |                                  |
| 38                | R                | 17854        | 18603       | 750                | Thymidylate synthase             |
| 39                | F                | 18734        | 19180       | 447                |                                  |
| 40                | F                | 19192        | 20409       | 1218               |                                  |
| 41                | F                | 20411        | 21961       | 1551               |                                  |



|    |   |       |       |      |                                               |
|----|---|-------|-------|------|-----------------------------------------------|
| 42 | F | 21963 | 22373 | 411  |                                               |
| 43 | R | 22500 | 23240 | 741  |                                               |
| 44 | R | 23242 | 23436 | 195  |                                               |
| 45 | R | 23429 | 24010 | 582  |                                               |
| 46 | R | 24013 | 24324 | 312  | NTP-PPase MazG-like domain                    |
| 47 | R | 24321 | 25772 | 1452 | RtcB                                          |
| 48 | R | 25769 | 26458 | 690  | Hef nuclease                                  |
| 49 | R | 26455 | 26610 | 156  |                                               |
| 50 | R | 26603 | 26869 | 267  |                                               |
| 51 | R | 26862 | 27119 | 258  |                                               |
| 52 | R | 27116 | 27577 | 462  |                                               |
| 53 | R | 27570 | 27956 | 387  |                                               |
| 54 | R | 27958 | 28383 | 426  |                                               |
| 55 | R | 28432 | 28506 | 75   | tRNA-Gln-ttg                                  |
| 56 | R | 28638 | 30827 | 2190 | Von Willebrand factor type A domain           |
| 57 | R | 30920 | 32257 | 1338 | AAA domain                                    |
| 58 | R | 32333 | 32782 | 450  |                                               |
| 59 | R | 32760 | 33179 | 420  |                                               |
| 60 | R | 33181 | 33642 | 462  |                                               |
| 61 | R | 33698 | 34357 | 660  | SprT                                          |
| 62 | F | 34617 | 35315 | 699  |                                               |
| 63 | R | 35319 | 35534 | 216  |                                               |
| 64 | R | 35642 | 36805 | 1164 |                                               |
| 65 | R | 36807 | 37433 | 627  | GTP cyclohydrolase I                          |
| 66 | R | 37446 | 38141 | 696  | Integral membrane protein                     |
| 67 | R | 38208 | 38372 | 165  |                                               |
| 68 | R | 38362 | 38484 | 123  |                                               |
| 69 | R | 38486 | 39274 | 789  | QueE                                          |
| 70 | R | 39271 | 39927 | 657  | HNH endonuclease domain                       |
| 71 | R | 39924 | 40367 | 444  |                                               |
| 72 | R | 40360 | 40515 | 156  |                                               |
| 73 | R | 40508 | 40966 | 459  | QueD                                          |
| 74 | R | 40959 | 41726 | 768  | QueC                                          |
| 75 | R | 41785 | 42189 | 405  |                                               |
| 76 | R | 42186 | 42647 | 462  | QueF                                          |
| 77 | R | 42735 | 43859 | 1125 |                                               |
| 78 | R | 43923 | 44129 | 207  |                                               |
| 79 | R | 44218 | 44463 | 246  |                                               |
| 80 | R | 44456 | 44935 | 480  |                                               |
| 81 | R | 44938 | 45138 | 201  |                                               |
| 82 | R | 45107 | 46369 | 1263 | Replication factor C, large subunit           |
| 83 | R | 46366 | 46527 | 162  | XapX                                          |
| 84 | R | 46530 | 47027 | 498  | N-Acyltransferase domain                      |
| 85 | R | 47021 | 49747 | 2727 | DNA polymerase, elongation subunit (family B) |

|     |   |       |       |      |                                     |
|-----|---|-------|-------|------|-------------------------------------|
| 86  | R | 49769 | 50065 | 297  | HNH endonuclease, C terminus        |
| 87  | R | 50068 | 50865 | 798  | PD-(D/E)XK nuclease                 |
| 88  | R | 50862 | 51173 | 312  |                                     |
| 89  | R | 51177 | 51380 | 204  |                                     |
| 90  | R | 51380 | 52408 | 1029 | Replication factor C, small subunit |
| 91  | R | 52436 | 52621 | 186  |                                     |
| 92  | R | 52618 | 52842 | 225  |                                     |
| 93  | R | 52835 | 53425 | 591  | TMP kinase                          |
| 94  | R | 53428 | 53904 | 477  |                                     |
| 95  | R | 53939 | 55090 | 1152 |                                     |
| 96  | R | 55112 | 55969 | 858  |                                     |
| 97  | R | 55962 | 56474 | 513  | RadA                                |
| 98  | R | 56467 | 57951 | 1485 | AAA domain                          |
| 99  | R | 57954 | 59045 | 1092 |                                     |
| 100 | F | 59230 | 60141 | 912  | RadA                                |
| 101 | R | 60145 | 60297 | 153  |                                     |
| 102 | R | 60297 | 60557 | 261  |                                     |
| 103 | F | 60816 | 61517 | 702  |                                     |
| 104 | F | 61514 | 62962 | 1449 | Terminase, large subunit            |
| 105 | F | 62969 | 64837 | 1869 | Portal                              |
| 106 | F | 64830 | 67970 | 3141 |                                     |
| 107 | F | 67967 | 69994 | 2028 |                                     |
| 108 | F | 69991 | 70881 | 891  | Mu gpF-like protein                 |
| 109 | F | 70928 | 74560 | 3633 | Zeta toxin domain                   |
| 110 | F | 74790 | 74951 | 162  |                                     |
| 111 | F | 74951 | 76948 | 1998 |                                     |
| 112 | F | 76960 | 78342 | 1383 | Major Capsid                        |
| 113 | F | 78361 | 78738 | 378  |                                     |
| 114 | F | 78756 | 79058 | 303  |                                     |
| 115 | F | 79065 | 79508 | 444  |                                     |
| 116 | F | 79510 | 79839 | 330  |                                     |
| 117 | F | 79839 | 80510 | 672  |                                     |
| 118 | F | 80510 | 81058 | 549  |                                     |
| 119 | F | 81055 | 81543 | 489  |                                     |
| 120 | F | 81540 | 81785 | 246  |                                     |
| 121 | F | 81834 | 82814 | 981  |                                     |
| 122 | F | 82817 | 83386 | 570  | Tail Assembly Chaperone             |
| 123 | F | 82817 | 83544 | 729  | Tail Assembly Chaperone             |
| 124 | F | 83537 | 83677 | 141  |                                     |
| 125 | F | 83677 | 84474 | 798  |                                     |
| 126 | F | 84476 | 86338 | 1863 | Tape Measure                        |
| 127 | F | 86338 | 88431 | 2094 | Endopeptidase tail                  |
| 128 | F | 88438 | 89757 | 1320 |                                     |
| 129 | F | 89757 | 92894 | 3138 |                                     |

|     |   |        |        |     |                  |
|-----|---|--------|--------|-----|------------------|
| 130 | F | 92891  | 93703  | 813 |                  |
| 131 | R | 93678  | 94103  | 426 |                  |
| 132 | R | 94324  | 94581  | 258 |                  |
| 133 | F | 94650  | 94811  | 162 |                  |
| 134 | F | 94808  | 95239  | 432 | RNAse HI         |
| 135 | F | 95481  | 96335  | 855 |                  |
| 136 | F | 96335  | 96580  | 246 |                  |
| 137 | F | 96577  | 96801  | 225 |                  |
| 138 | F | 96858  | 96965  | 108 |                  |
| 139 | F | 97077  | 97451  | 375 |                  |
| 140 | F | 97448  | 97621  | 174 |                  |
| 141 | F | 97618  | 97812  | 195 |                  |
| 142 | F | 97815  | 98291  | 477 |                  |
| 143 | F | 98288  | 98527  | 240 |                  |
| 144 | F | 98524  | 99066  | 543 |                  |
| 145 | F | 99063  | 99266  | 204 |                  |
| 146 | R | 99257  | 99904  | 648 | Trimeric dUTPase |
| 147 | F | 100005 | 100139 | 135 |                  |
| 148 | F | 100132 | 100254 | 123 |                  |
| 149 | F | 100251 | 100394 | 144 |                  |
| 150 | F | 100391 | 100618 | 228 |                  |
| 151 | F | 100615 | 100812 | 198 |                  |
| 152 | F | 100802 | 100954 | 153 |                  |
| 153 | F | 100951 | 101166 | 216 |                  |
| 154 | F | 101156 | 101311 | 156 |                  |
| 155 | F | 101301 | 101444 | 144 |                  |
| 156 | F | 101437 | 101691 | 255 |                  |
| 157 | F | 101684 | 101869 | 186 |                  |
| 158 | F | 101859 | 101993 | 135 |                  |
| 159 | F | 101980 | 102105 | 126 |                  |
| 160 | F | 102089 | 102250 | 162 |                  |
| 161 | F | 102662 | 102982 | 321 |                  |

**Table S4.** HCTV-2 genome features.

| <b>ORF number</b> | <b>Direction</b> | <b>Start</b> | <b>Stop</b> | <b>Length (nt)</b> | <b>Function</b>   |
|-------------------|------------------|--------------|-------------|--------------------|-------------------|
| 1                 | F                | 1            | 426         | 426                |                   |
| 2                 | F                | 423          | 755         | 333                |                   |
| 3                 | F                | 752          | 1258        | 507                |                   |
| 4                 | F                | 1262         | 1468        | 207                |                   |
| 5                 | F                | 1465         | 2055        | 591                | DnaJ-like protein |
| 6                 | F                | 2052         | 2564        | 513                |                   |

|    |   |       |       |      |                                             |
|----|---|-------|-------|------|---------------------------------------------|
| 7  | F | 2554  | 2751  | 198  |                                             |
| 8  | F | 2748  | 3158  | 411  |                                             |
| 9  | F | 3158  | 3331  | 174  |                                             |
| 10 | F | 3367  | 3609  | 243  |                                             |
| 11 | F | 3554  | 5134  | 1581 | ParB-like nuclease and AdoMet-MTase domains |
| 12 | F | 5141  | 5782  | 642  | AdoMet-MTase                                |
| 13 | F | 5779  | 6123  | 345  |                                             |
| 14 | F | 6250  | 6405  | 156  |                                             |
| 15 | F | 6398  | 7009  | 612  |                                             |
| 16 | F | 6999  | 7100  | 102  |                                             |
| 17 | F | 7113  | 7439  | 327  |                                             |
| 18 | F | 7439  | 8254  | 816  | AdoMet-MTase                                |
| 19 | F | 8247  | 8603  | 357  |                                             |
| 20 | F | 8642  | 9007  | 366  |                                             |
| 21 | F | 9138  | 9461  | 324  |                                             |
| 22 | F | 9466  | 11130 | 1665 | Terminase, large subunit                    |
| 23 | F | 11207 | 13567 | 2361 | Portal and Mu gpF-like protein              |
| 24 | F | 13567 | 13866 | 300  |                                             |
| 25 | F | 13866 | 15224 | 1359 |                                             |
| 26 | F | 15228 | 15494 | 267  |                                             |
| 27 | F | 15494 | 15865 | 372  | SNase-like protein                          |
| 28 | F | 15804 | 16007 | 204  |                                             |
| 29 | F | 15997 | 16185 | 189  |                                             |
| 30 | F | 16116 | 17564 | 1449 |                                             |
| 31 | F | 17636 | 17821 | 186  |                                             |
| 32 | F | 17932 | 19533 | 1602 | Prohead protease                            |
| 33 | F | 19535 | 20716 | 1182 | Major Capsid                                |
| 34 | F | 20720 | 20995 | 276  |                                             |
| 35 | F | 21043 | 21789 | 747  |                                             |
| 36 | F | 21792 | 22346 | 555  |                                             |
| 37 | F | 22343 | 22822 | 480  |                                             |
| 38 | F | 22833 | 23159 | 327  |                                             |
| 39 | F | 23162 | 24142 | 981  | Tail Tube                                   |
| 40 | F | 24176 | 24652 | 477  | Tail Assembly Chaperone                     |
| 41 | F | 24176 | 25143 | 969  | Tail Assembly Chaperone                     |
| 42 | F | 25147 | 26454 | 1308 | Tape Measure                                |
| 43 | F | 26470 | 26913 | 444  |                                             |
| 44 | F | 26921 | 28390 | 1470 |                                             |
| 45 | F | 28390 | 29193 | 804  |                                             |
| 46 | F | 29196 | 30191 | 996  |                                             |
| 47 | R | 30313 | 31185 | 873  |                                             |
| 48 | R | 31192 | 31332 | 141  |                                             |
| 49 | R | 31396 | 31521 | 126  |                                             |
| 50 | R | 31564 | 32070 | 507  |                                             |

|    |   |       |       |      |                                     |
|----|---|-------|-------|------|-------------------------------------|
| 51 | R | 32078 | 32455 | 378  |                                     |
| 52 | R | 32455 | 32625 | 171  |                                     |
| 53 | R | 32622 | 32939 | 318  |                                     |
| 54 | R | 32936 | 33157 | 222  |                                     |
| 55 | R | 33154 | 33408 | 255  |                                     |
| 56 | R | 33405 | 33500 | 96   |                                     |
| 57 | R | 33500 | 34135 | 636  |                                     |
| 58 | F | 34405 | 35997 | 1593 |                                     |
| 59 | F | 35997 | 37094 | 1098 | Laminin G domain                    |
| 60 | F | 37096 | 38349 | 1254 | PQQ-like domain                     |
| 61 | F | 38346 | 38834 | 489  |                                     |
| 62 | R | 38835 | 39236 | 402  | Holliday junction resolvase         |
| 63 | R | 39236 | 40048 | 813  |                                     |
| 64 | R | 40038 | 40340 | 303  |                                     |
| 65 | R | 40333 | 40827 | 495  |                                     |
| 66 | R | 40829 | 41005 | 177  |                                     |
| 67 | R | 40998 | 41279 | 282  |                                     |
| 68 | R | 41289 | 41696 | 408  |                                     |
| 69 | R | 41689 | 42003 | 315  |                                     |
| 70 | R | 42000 | 42488 | 489  |                                     |
| 71 | R | 42584 | 43003 | 420  |                                     |
| 72 | R | 43000 | 43230 | 231  |                                     |
| 73 | R | 43223 | 45076 | 1854 |                                     |
| 74 | R | 45070 | 45414 | 345  |                                     |
| 75 | R | 45418 | 46611 | 1194 |                                     |
| 76 | R | 46618 | 46776 | 159  |                                     |
| 77 | R | 46754 | 46924 | 171  |                                     |
| 78 | F | 47003 | 47266 | 264  |                                     |
| 79 | F | 47270 | 49624 | 2355 | Von Willebrand factor type A domain |
| 80 | F | 49663 | 50199 | 537  | HNH endonuclease domain             |
| 81 | F | 50199 | 50924 | 726  |                                     |
| 82 | F | 51055 | 51264 | 210  |                                     |
| 83 | F | 51264 | 52817 | 1554 | AAA domain                          |
| 84 | F | 52835 | 53299 | 465  |                                     |
| 85 | F | 53361 | 53540 | 180  |                                     |
| 86 | R | 53624 | 54184 | 561  |                                     |

**Table S5.** HCTV-5 genome features.

| <b>ORF number</b> | <b>Direction</b> | <b>Start</b> | <b>Stop</b> | <b>Length (nt)</b> | <b>Function</b> |
|-------------------|------------------|--------------|-------------|--------------------|-----------------|
| 1                 | F                | 399          | 620         | 222                |                 |
| 2                 | F                | 653          | 1138        | 486                |                 |
| 3                 | R                | 1148         | 1315        | 168                |                 |
| 4                 | R                | 1312         | 1518        | 207                |                 |

|    |   |       |       |      |                                  |
|----|---|-------|-------|------|----------------------------------|
| 5  | R | 1515  | 1832  | 318  |                                  |
| 6  | R | 1895  | 2467  | 573  |                                  |
| 7  | F | 2543  | 2800  | 258  |                                  |
| 8  | R | 2806  | 2979  | 174  |                                  |
| 9  | R | 3022  | 3282  | 261  |                                  |
| 10 | R | 3279  | 3431  | 153  |                                  |
| 11 | R | 3424  | 3708  | 285  |                                  |
| 12 | R | 3734  | 3925  | 192  |                                  |
| 13 | R | 3922  | 4059  | 138  |                                  |
| 14 | R | 4056  | 4223  | 168  |                                  |
| 15 | R | 4508  | 4759  | 252  |                                  |
| 16 | R | 4756  | 4857  | 102  |                                  |
| 17 | R | 4854  | 5339  | 486  |                                  |
| 18 | R | 5339  | 5596  | 258  |                                  |
| 19 | F | 5648  | 5857  | 210  |                                  |
| 20 | F | 5966  | 6292  | 327  |                                  |
| 21 | F | 6294  | 6563  | 270  |                                  |
| 22 | F | 6642  | 7115  | 474  | HNH endonuclease domain          |
| 23 | F | 7112  | 7429  | 318  |                                  |
| 24 | F | 7419  | 7811  | 393  |                                  |
| 25 | F | 7814  | 10792 | 2979 | Ribonucleotide reductase         |
| 26 | F | 10861 | 11298 | 438  |                                  |
| 27 | F | 11332 | 11790 | 459  |                                  |
| 28 | F | 11783 | 12055 | 273  |                                  |
| 29 | F | 12057 | 12224 | 168  |                                  |
| 30 | F | 12310 | 13494 | 1185 |                                  |
| 31 | F | 13638 | 14957 | 1320 |                                  |
| 32 | F | 15001 | 15504 | 504  |                                  |
| 33 | F | 15504 | 15647 | 144  |                                  |
| 34 | F | 15644 | 15898 | 255  |                                  |
| 35 | F | 16016 | 17245 | 1230 | DNA polymerase II, small subunit |
| 36 | R | 17305 | 17688 | 384  |                                  |
| 37 | R | 17690 | 18271 | 582  |                                  |
| 38 | R | 18268 | 18993 | 726  |                                  |
| 39 | R | 19032 | 19985 | 954  | Thymidylate synthase             |
| 40 | R | 20163 | 20903 | 741  |                                  |
| 41 | R | 20906 | 21478 | 573  |                                  |
| 42 | R | 21480 | 21962 | 483  | HNH endonuclease domain          |
| 43 | R | 21946 | 22257 | 312  | NTP-PPase MazG-like domain       |
| 44 | R | 22250 | 22393 | 144  |                                  |
| 45 | R | 22390 | 23850 | 1461 | RtcB                             |
| 46 | R | 23843 | 24073 | 231  |                                  |
| 47 | R | 24070 | 24240 | 171  |                                  |
| 48 | R | 24224 | 25132 | 909  | AdoMet-MTase                     |

|    |   |       |       |      |                                               |
|----|---|-------|-------|------|-----------------------------------------------|
| 49 | R | 25125 | 26303 | 1179 | Hef and HNH endonuclease                      |
| 50 | R | 26300 | 26437 | 138  |                                               |
| 51 | R | 26427 | 26579 | 153  |                                               |
| 52 | R | 26572 | 26832 | 261  |                                               |
| 53 | R | 26825 | 27082 | 258  |                                               |
| 54 | R | 27079 | 27543 | 465  |                                               |
| 55 | R | 27536 | 27925 | 390  |                                               |
| 56 | R | 27925 | 28401 | 477  | HNH endonuclease domain                       |
| 57 | R | 28404 | 28838 | 435  |                                               |
| 58 | R | 28885 | 28959 | 75   | tRNA Gln (ttg)                                |
| 59 | R | 29049 | 29210 | 162  |                                               |
| 60 | R | 29210 | 31441 | 2232 | Von Willebrand factor type A domain           |
| 61 | R | 31513 | 31701 | 189  |                                               |
| 62 | R | 31729 | 33066 | 1338 | AAA domain                                    |
| 63 | R | 33140 | 33601 | 462  |                                               |
| 64 | R | 33579 | 34031 | 453  |                                               |
| 65 | R | 33998 | 34444 | 447  |                                               |
| 66 | R | 34502 | 35164 | 663  | SprT                                          |
| 67 | R | 35235 | 35438 | 204  |                                               |
| 68 | R | 35454 | 36569 | 1116 |                                               |
| 69 | R | 36571 | 37200 | 630  | GTP cyclohydrolase I                          |
| 70 | R | 37213 | 37392 | 180  |                                               |
| 71 | R | 37385 | 37513 | 129  |                                               |
| 72 | R | 37510 | 38295 | 786  | QueE                                          |
| 73 | R | 38292 | 38735 | 444  |                                               |
| 74 | R | 38728 | 38862 | 135  |                                               |
| 75 | R | 38862 | 39320 | 459  | QueD                                          |
| 76 | R | 39317 | 40081 | 765  | QueC                                          |
| 77 | R | 40139 | 40621 | 483  | HNH endonuclease domain                       |
| 78 | R | 40634 | 41050 | 417  |                                               |
| 79 | R | 41050 | 41265 | 216  |                                               |
| 80 | R | 41270 | 41611 | 342  |                                               |
| 81 | R | 41611 | 42072 | 462  | QueF                                          |
| 82 | R | 42116 | 42601 | 486  | LAGLIDADG endonuclease                        |
| 83 | R | 42598 | 42732 | 135  |                                               |
| 84 | R | 43038 | 43892 | 855  | AdoMet-MTase                                  |
| 85 | R | 43895 | 45139 | 1245 | Replication factor C, large subunit           |
| 86 | R | 45132 | 45329 | 198  |                                               |
| 87 | R | 45332 | 45829 | 498  | N-Acyltransferase domain                      |
| 88 | R | 45823 | 48564 | 2742 | DNA polymerase, elongation subunit (family B) |
| 89 | R | 48586 | 49197 | 612  | HNH endonuclease domain                       |
| 90 | R | 49197 | 49994 | 798  | PD-(D/E)XK nuclease                           |
| 91 | R | 49987 | 50304 | 318  |                                               |
| 92 | R | 50306 | 50494 | 189  |                                               |

|     |   |       |       |      |                                      |
|-----|---|-------|-------|------|--------------------------------------|
| 93  | R | 50491 | 51474 | 984  | Replication factor C, small subunit  |
| 94  | R | 51541 | 52131 | 591  | TMP kinase                           |
| 95  | R | 52134 | 52586 | 453  |                                      |
| 96  | R | 52588 | 53739 | 1152 |                                      |
| 97  | R | 53754 | 54611 | 858  |                                      |
| 98  | R | 54604 | 55101 | 498  | RadA                                 |
| 99  | R | 55094 | 56614 | 1521 |                                      |
| 100 | R | 56611 | 57654 | 1044 |                                      |
| 101 | F | 57888 | 58799 | 912  | RadA                                 |
| 102 | F | 58893 | 59141 | 249  |                                      |
| 103 | F | 59388 | 60050 | 663  |                                      |
| 104 | F | 60047 | 60604 | 558  | HNH endonuclease domain              |
| 105 | F | 60594 | 62039 | 1446 | Terminase, large subunit             |
| 106 | F | 62033 | 62620 | 588  | HNH endonuclease domain              |
| 107 | F | 62624 | 64486 | 1863 | Portal                               |
| 108 | F | 64479 | 65225 | 747  | HNH endonuclease domain              |
| 109 | F | 65222 | 66190 | 969  | ADP-ribosyltransferase               |
| 110 | F | 66183 | 67196 | 1014 | Mu gpF-like protein                  |
| 111 | F | 67233 | 67976 | 744  | HNH endonuclease domain              |
| 112 | F | 67992 | 69929 | 1938 | Sialidase                            |
| 113 | R | 69989 | 70690 | 702  | Integrase                            |
| 114 | F | 70811 | 74692 | 3882 | Zeta toxin and ParB nuclease domains |
| 115 | R | 74693 | 75166 | 474  | LAGLIDADG endonuclease               |
| 116 | R | 75365 | 75532 | 168  |                                      |
| 117 | F | 75392 | 75583 | 192  |                                      |
| 118 | F | 75620 | 77494 | 1875 |                                      |
| 119 | F | 77510 | 78883 | 1374 | Major Capsid                         |
| 120 | F | 78902 | 79279 | 378  |                                      |
| 121 | F | 79298 | 79630 | 333  |                                      |
| 122 | F | 79637 | 80050 | 414  |                                      |
| 123 | F | 80053 | 80385 | 333  |                                      |
| 124 | F | 80385 | 81065 | 681  |                                      |
| 125 | F | 81065 | 81676 | 612  |                                      |
| 126 | F | 81676 | 82146 | 471  |                                      |
| 127 | F | 82164 | 83177 | 1014 | Tail Tube                            |
| 128 | F | 83232 | 83648 | 417  | Tail Assembly Chaperone              |
| 129 | F | 83232 | 83986 | 756  | Tail Assembly Chaperone              |
| 130 | F | 83988 | 85430 | 1443 | Tape Measure                         |
| 131 | F | 85427 | 85882 | 456  |                                      |
| 132 | F | 85889 | 87319 | 1431 |                                      |
| 133 | F | 87312 | 88094 | 783  |                                      |
| 134 | F | 88094 | 89086 | 993  |                                      |
| 135 | F | 89100 | 90596 | 1497 |                                      |
| 136 | F | 90599 | 91708 | 1110 | Laminin G domain                     |



|     |   |        |        |     |                  |
|-----|---|--------|--------|-----|------------------|
| 137 | F | 91710  | 92423  | 714 |                  |
| 138 | F | 92479  | 92655  | 177 |                  |
| 139 | R | 92727  | 92918  | 192 |                  |
| 140 | R | 92911  | 93267  | 357 |                  |
| 141 | F | 93351  | 93539  | 189 |                  |
| 142 | F | 93536  | 93967  | 432 | RNase HI         |
| 143 | R | 93964  | 94341  | 378 |                  |
| 144 | F | 94594  | 95460  | 867 |                  |
| 145 | F | 95457  | 95696  | 240 |                  |
| 146 | F | 95728  | 95919  | 192 |                  |
| 147 | F | 95910  | 96092  | 183 |                  |
| 148 | F | 96085  | 96348  | 264 |                  |
| 149 | F | 96350  | 96535  | 186 |                  |
| 150 | F | 96532  | 96918  | 387 |                  |
| 151 | F | 96915  | 97352  | 438 |                  |
| 152 | F | 97349  | 97558  | 210 |                  |
| 153 | R | 97555  | 98196  | 642 | Trimeric dUTPase |
| 154 | F | 98298  | 98627  | 330 |                  |
| 155 | F | 98624  | 98857  | 234 |                  |
| 156 | F | 98835  | 99035  | 201 |                  |
| 157 | F | 99029  | 99202  | 174 |                  |
| 158 | F | 99199  | 99390  | 192 |                  |
| 159 | F | 99387  | 99578  | 192 |                  |
| 160 | F | 99571  | 99726  | 156 |                  |
| 161 | F | 99713  | 99874  | 162 |                  |
| 162 | F | 99890  | 100111 | 222 |                  |
| 163 | F | 100164 | 100643 | 480 |                  |
| 164 | F | 100646 | 101233 | 588 | GIY-YIG nuclease |
| 165 | R | 101287 | 101430 | 144 |                  |
| 166 | R | 101427 | 101741 | 315 |                  |
| 167 | R | 101738 | 101890 | 153 |                  |

**Table S6.** HGTV-1 genome features.

| <b>ORF number</b> | <b>Direction</b> | <b>Start</b> | <b>Stop</b> | <b>Length (nt)</b> | <b>Function</b>                |
|-------------------|------------------|--------------|-------------|--------------------|--------------------------------|
| 1                 | F                | 1            | 114         | 114                |                                |
| 2                 | F                | 162          | 764         | 603                |                                |
| 3                 | F                | 961          | 1569        | 609                |                                |
| 4                 | F                | 1572         | 1940        | 369                |                                |
| 5                 | F                | 1933         | 3246        | 1314               | Terminase, large subunit       |
| 6                 | F                | 3250         | 3603        | 354                |                                |
| 7                 | F                | 3605         | 5821        | 2217               | Portal and Mu gpF-like protein |

|    |   |       |       |      |                                               |
|----|---|-------|-------|------|-----------------------------------------------|
| 8  | F | 5847  | 6587  | 741  |                                               |
| 9  | F | 6602  | 6937  | 336  |                                               |
| 10 | F | 6949  | 8727  | 1779 |                                               |
| 11 | F | 8822  | 11488 | 2667 | Prohead protease                              |
| 12 | F | 11506 | 11976 | 471  |                                               |
| 13 | F | 11995 | 12831 | 837  | Major Capsid                                  |
| 14 | F | 12894 | 13319 | 426  |                                               |
| 15 | F | 13320 | 13838 | 519  |                                               |
| 16 | F | 13842 | 14402 | 561  |                                               |
| 17 | F | 14463 | 15818 | 1356 | Tail Sheath                                   |
| 18 | F | 15830 | 16231 | 402  |                                               |
| 19 | F | 16397 | 16843 | 447  |                                               |
| 20 | F | 16852 | 17058 | 207  |                                               |
| 21 | F | 17062 | 20013 | 2952 | Tape Measure                                  |
| 22 | F | 20021 | 20650 | 630  |                                               |
| 23 | F | 20650 | 21900 | 1251 | Late control GPD                              |
| 24 | F | 21903 | 22565 | 663  | Baseplate V-like protein                      |
| 25 | F | 22649 | 23026 | 378  |                                               |
| 26 | F | 23023 | 24432 | 1410 | Baseplate J-like protein                      |
| 27 | F | 24433 | 25599 | 1167 |                                               |
| 28 | F | 25651 | 26217 | 567  |                                               |
| 29 | F | 26256 | 27323 | 1068 |                                               |
| 30 | F | 27362 | 27550 | 189  |                                               |
| 31 | F | 27560 | 28534 | 975  |                                               |
| 32 | F | 28531 | 29358 | 828  |                                               |
| 33 | F | 29361 | 30197 | 837  |                                               |
| 34 | F | 30256 | 30792 | 537  |                                               |
| 35 | F | 30785 | 31027 | 243  |                                               |
| 36 | F | 31024 | 31194 | 171  |                                               |
| 37 | F | 31200 | 31589 | 390  |                                               |
| 38 | R | 31623 | 32231 | 609  | RadA                                          |
| 39 | F | 32330 | 33073 | 744  | PD-(D/E)XK nuclease                           |
| 40 | F | 33063 | 33374 | 312  |                                               |
| 41 | F | 33401 | 34459 | 1059 | Carbamoyl phosphate synthase, small subunit   |
| 42 | R | 34444 | 35016 | 573  | Holliday junction resolvase                   |
| 43 | R | 35019 | 35687 | 669  | RecB-like nuclease                            |
| 44 | R | 35680 | 36099 | 420  |                                               |
| 45 | R | 36154 | 36516 | 363  |                                               |
| 46 | R | 36524 | 36751 | 228  |                                               |
| 47 | R | 36753 | 36947 | 195  |                                               |
| 48 | R | 36944 | 37105 | 162  |                                               |
| 49 | R | 37147 | 40026 | 2880 | DNA polymerase, elongation subunit (family B) |
| 50 | R | 40035 | 40826 | 792  | LAGLIDADG endonuclease                        |
| 51 | R | 40869 | 41096 | 228  |                                               |

|    |   |       |       |     |                         |
|----|---|-------|-------|-----|-------------------------|
| 52 | R | 41136 | 41585 | 450 |                         |
| 53 | R | 41582 | 41788 | 207 |                         |
| 54 | R | 41792 | 42220 | 429 |                         |
| 55 | R | 42266 | 42352 | 87  | tRNA Ser (gga)          |
| 56 | R | 42353 | 42595 | 243 |                         |
| 57 | R | 42609 | 42683 | 75  | tRNA Val (gac)          |
| 58 | R | 42688 | 42762 | 75  | tRNA Val (tac)          |
| 59 | R | 42770 | 42840 | 71  | tRNA Pro (tgg)          |
| 60 | R | 42885 | 43220 | 336 |                         |
| 61 | R | 43249 | 43431 | 183 |                         |
| 62 | R | 43406 | 43648 | 243 |                         |
| 63 | R | 43645 | 44151 | 507 |                         |
| 64 | R | 44129 | 44374 | 246 |                         |
| 65 | R | 44371 | 44673 | 303 |                         |
| 66 | R | 44675 | 44815 | 141 |                         |
| 67 | R | 44841 | 45485 | 645 | AdoMet-MTase            |
| 68 | R | 45441 | 45526 | 86  | tRNA Leu (taa)          |
| 69 | R | 45530 | 45613 | 84  | tRNA Leu (caa)          |
| 70 | R | 45617 | 45700 | 84  | tRNA Leu (gag)          |
| 71 | R | 45786 | 45869 | 84  | tRNA Leu (tag)          |
| 72 | R | 45900 | 46352 | 453 |                         |
| 73 | R | 46355 | 46430 | 76  | tRNA Arg (tct)          |
| 74 | R | 46465 | 46698 | 234 |                         |
| 75 | R | 46701 | 46774 | 74  | tRNA Arg (tcg)          |
| 76 | R | 46894 | 47427 | 534 |                         |
| 77 | R | 47537 | 47609 | 73  | tRNA Cys (gca)          |
| 78 | R | 47619 | 47909 | 291 |                         |
| 79 | R | 48011 | 48085 | 75  | tRNA Ile (gat)          |
| 80 | R | 48088 | 48162 | 75  | tRNA Gln (ctg)          |
| 81 | R | 48250 | 48320 | 71  | tRNA Ile (gat)          |
| 82 | R | 48474 | 48544 | 71  | tRNA Trp (cca)          |
| 83 | R | 48548 | 48620 | 73  | tRNA Gln (ttg)          |
| 84 | R | 48804 | 48876 | 73  | tRNA Lys (ttt)          |
| 85 | R | 48877 | 48952 | 76  | tRNA Thr (ggt)          |
| 86 | R | 48955 | 49029 | 75  | tRNA Thr (cgt)          |
| 87 | R | 49031 | 49103 | 73  | tRNA Thr (tgt)          |
| 88 | R | 49226 | 49328 | 103 | tRNA Ala (tgc) + Intron |
| 89 | R | 49346 | 49759 | 414 |                         |
| 90 | R | 50108 | 50193 | 86  | tRNA Met (cat)          |
| 91 | R | 50195 | 50271 | 77  | tRNA Lys (ctt)          |
| 92 | R | 50274 | 50347 | 74  | tRNA Tyr (gta)          |
| 93 | R | 50351 | 50423 | 73  | tRNA Asn (gtt)          |
| 94 | R | 50474 | 50544 | 71  | tRNA Gly (gcc)          |
| 95 | R | 50549 | 50619 | 71  | tRNA Gly (tcc)          |

|     |   |       |       |      |                          |
|-----|---|-------|-------|------|--------------------------|
| 96  | R | 50624 | 50697 | 74   | tRNA His (gtg)           |
| 97  | R | 50742 | 50951 | 210  |                          |
| 98  | R | 50948 | 51316 | 369  |                          |
| 99  | R | 51342 | 51551 | 210  |                          |
| 100 | R | 51556 | 51632 | 77   | tRNA Glu (ctc)           |
| 101 | R | 51634 | 51710 | 77   | tRNA Phe (gaa)           |
| 102 | R | 51714 | 52079 | 366  |                          |
| 103 | R | 52305 | 52375 | 71   | tRNA Asp (gtc)           |
| 104 | R | 52408 | 52998 | 591  | LAGLIDADG endonuclease   |
| 105 | R | 53348 | 53420 | 73   | tRNA Arg (gcg)           |
| 106 | R | 53450 | 54052 | 603  | TMP kinase               |
| 107 | F | 54188 | 54736 | 549  | Trimeric dUTPase         |
| 108 | F | 54838 | 57198 | 2361 | Ribonucleotide reductase |
| 109 | F | 57198 | 57290 | 93   |                          |
| 110 | F | 57333 | 57485 | 153  |                          |
| 111 | F | 57528 | 57665 | 138  | zinc-ribbon domain       |
| 112 | R | 57662 | 58156 | 495  | DUF488                   |
| 113 | R | 58197 | 58607 | 411  |                          |
| 114 | R | 58604 | 58843 | 240  |                          |
| 115 | R | 58840 | 59145 | 306  |                          |
| 116 | R | 59145 | 59360 | 216  |                          |
| 117 | R | 59357 | 60160 | 804  | Thymidylate synthase     |
| 118 | R | 60157 | 60420 | 264  |                          |
| 119 | R | 60459 | 60701 | 243  |                          |
| 120 | R | 60727 | 60999 | 273  |                          |
| 121 | R | 60996 | 61343 | 348  |                          |
| 122 | R | 61383 | 61892 | 510  |                          |
| 123 | R | 61948 | 62277 | 330  |                          |
| 124 | R | 62277 | 64100 | 1824 |                          |
| 125 | R | 64131 | 64574 | 444  |                          |
| 126 | R | 64543 | 65424 | 882  | Nucleotidyltransferase   |
| 127 | R | 65450 | 65752 | 303  |                          |
| 128 | R | 65749 | 66069 | 321  |                          |
| 129 | R | 66069 | 67598 | 1530 | TROVE domain             |
| 130 | R | 67732 | 67878 | 147  |                          |
| 131 | R | 67871 | 68254 | 384  |                          |
| 132 | R | 68224 | 68304 | 81   |                          |
| 133 | R | 68447 | 68749 | 303  |                          |
| 134 | R | 68827 | 69825 | 999  |                          |
| 135 | R | 70053 | 70253 | 201  |                          |
| 136 | R | 70440 | 70571 | 132  | tRNA Asp (gtc) + Intron  |
| 137 | R | 70671 | 71060 | 390  |                          |
| 138 | R | 71053 | 71307 | 255  |                          |
| 139 | R | 71304 | 71675 | 372  | Cysteine hydrolase       |

|     |   |       |       |      |                                     |
|-----|---|-------|-------|------|-------------------------------------|
| 140 | R | 71725 | 73179 | 1455 | RtcB                                |
| 141 | R | 73235 | 73597 | 363  |                                     |
| 142 | R | 73597 | 73701 | 105  |                                     |
| 143 | R | 73742 | 74392 | 651  |                                     |
| 144 | R | 74414 | 74527 | 114  |                                     |
| 145 | R | 74537 | 75004 | 468  | RNAse HI                            |
| 146 | R | 75001 | 75240 | 240  |                                     |
| 147 | R | 75237 | 75578 | 342  |                                     |
| 148 | F | 75620 | 75811 | 192  |                                     |
| 149 | R | 75902 | 76192 | 291  |                                     |
| 150 | R | 76185 | 76457 | 273  |                                     |
| 151 | R | 76454 | 76795 | 342  |                                     |
| 152 | R | 76804 | 77067 | 264  |                                     |
| 153 | R | 77073 | 77579 | 507  |                                     |
| 154 | R | 77582 | 77812 | 231  |                                     |
| 155 | R | 77809 | 78012 | 204  |                                     |
| 156 | R | 77981 | 78295 | 315  |                                     |
| 157 | R | 78292 | 78669 | 378  |                                     |
| 158 | R | 78701 | 78838 | 138  |                                     |
| 159 | R | 78878 | 79201 | 324  |                                     |
| 160 | R | 79230 | 79553 | 324  |                                     |
| 161 | R | 79550 | 79906 | 357  |                                     |
| 162 | R | 79908 | 80237 | 330  |                                     |
| 163 | R | 80360 | 80890 | 531  |                                     |
| 164 | R | 80890 | 81093 | 204  |                                     |
| 165 | R | 81090 | 81323 | 234  |                                     |
| 166 | R | 81310 | 81951 | 642  | LAGLIDADG endonuclease              |
| 167 | R | 81995 | 82777 | 783  |                                     |
| 168 | R | 82809 | 83153 | 345  |                                     |
| 169 | R | 83193 | 83456 | 264  |                                     |
| 170 | R | 83447 | 83605 | 159  |                                     |
| 171 | R | 83602 | 84276 | 675  |                                     |
| 172 | R | 84276 | 85865 | 1590 | HSP90 chaperone                     |
| 173 | R | 85894 | 86187 | 294  |                                     |
| 174 | R | 86212 | 86478 | 267  | Thioredoxin                         |
| 175 | R | 86505 | 86810 | 306  |                                     |
| 176 | R | 86836 | 87066 | 231  |                                     |
| 177 | R | 87152 | 87391 | 240  |                                     |
| 178 | R | 87384 | 87701 | 318  |                                     |
| 179 | R | 87694 | 88098 | 405  | Ser/Thr and Tyr protein phosphatase |
| 180 | R | 88138 | 89007 | 870  |                                     |
| 181 | R | 89040 | 89633 | 594  | Restriction endonuclease EcoRV      |
| 182 | R | 89623 | 89928 | 306  |                                     |
| 183 | R | 89925 | 90212 | 288  |                                     |

|     |   |        |        |      |                               |
|-----|---|--------|--------|------|-------------------------------|
| 184 | R | 90244  | 90534  | 291  |                               |
| 185 | R | 90565  | 90795  | 231  |                               |
| 186 | R | 90799  | 90933  | 135  |                               |
| 187 | R | 90971  | 91315  | 345  |                               |
| 188 | R | 91312  | 91488  | 177  |                               |
| 189 | R | 91513  | 91908  | 396  | PD-(D/E)XKnuclase             |
| 190 | R | 91926  | 92150  | 225  |                               |
| 191 | F | 92225  | 92335  | 111  |                               |
| 192 | F | 92332  | 92568  | 237  |                               |
| 193 | F | 92595  | 92933  | 339  |                               |
| 194 | F | 92930  | 93205  | 276  |                               |
| 195 | F | 93237  | 93554  | 318  |                               |
| 196 | F | 93551  | 93928  | 378  |                               |
| 197 | F | 93946  | 95073  | 1128 | class I lysyl tRNA synthetase |
| 198 | F | 95098  | 95406  | 309  |                               |
| 199 | F | 95390  | 95665  | 276  |                               |
| 200 | F | 95658  | 95888  | 231  |                               |
| 201 | F | 95911  | 96576  | 666  |                               |
| 202 | F | 96593  | 96730  | 138  |                               |
| 203 | F | 96766  | 99378  | 2613 |                               |
| 204 | F | 99413  | 99553  | 141  |                               |
| 205 | F | 99546  | 100172 | 627  | LAGLIDADG endonuclease        |
| 206 | F | 100220 | 100471 | 252  |                               |
| 207 | F | 100513 | 101529 | 1017 |                               |
| 208 | F | 101568 | 102287 | 720  | Metallophosphatase            |
| 209 | F | 102284 | 102541 | 258  |                               |
| 210 | F | 102531 | 102803 | 273  |                               |
| 211 | F | 102865 | 103083 | 219  |                               |
| 212 | F | 103094 | 103816 | 723  | Endonuclease III              |
| 213 | F | 103818 | 104048 | 231  |                               |
| 214 | F | 104102 | 104284 | 183  |                               |
| 215 | F | 104316 | 104990 | 675  |                               |
| 216 | F | 104990 | 105136 | 147  |                               |
| 217 | F | 105172 | 106134 | 963  | RNA ligase                    |
| 218 | F | 106131 | 106391 | 261  |                               |
| 219 | F | 106396 | 106815 | 420  |                               |
| 220 | F | 106819 | 107265 | 447  |                               |
| 221 | F | 107272 | 107577 | 306  |                               |
| 222 | F | 107574 | 107822 | 249  |                               |
| 223 | F | 107844 | 109271 | 1428 | DNA ligase                    |
| 224 | F | 109307 | 109486 | 180  |                               |
| 225 | F | 109617 | 109754 | 138  |                               |
| 226 | F | 109751 | 110017 | 267  |                               |
| 227 | F | 110056 | 110256 | 201  |                               |

|     |   |        |        |      |                                         |
|-----|---|--------|--------|------|-----------------------------------------|
| 228 | F | 110282 | 110683 | 402  |                                         |
| 229 | F | 110692 | 111594 | 903  | SPFH/Band 7 domain                      |
| 230 | F | 111681 | 111845 | 165  |                                         |
| 231 | F | 111875 | 112333 | 459  |                                         |
| 232 | F | 112330 | 112491 | 162  |                                         |
| 233 | F | 112501 | 113565 | 1065 | HNH endonuclease domain                 |
| 234 | F | 113585 | 113716 | 132  |                                         |
| 235 | F | 113713 | 113985 | 273  |                                         |
| 236 | F | 113989 | 114933 | 945  | AdoMet-MTase                            |
| 237 | F | 114926 | 115144 | 219  |                                         |
| 238 | F | 115147 | 115398 | 252  |                                         |
| 239 | F | 115395 | 115589 | 195  |                                         |
| 240 | F | 115610 | 116092 | 483  |                                         |
| 241 | F | 116127 | 116897 | 771  | SprT                                    |
| 242 | F | 116909 | 118210 | 1302 | tRNA adenylyltransferase                |
| 243 | F | 118232 | 118465 | 234  |                                         |
| 244 | F | 118475 | 119101 | 627  |                                         |
| 245 | F | 119145 | 119291 | 147  |                                         |
| 246 | F | 119281 | 119862 | 582  | zinc finger                             |
| 247 | F | 119884 | 120456 | 573  |                                         |
| 248 | F | 120461 | 120613 | 153  |                                         |
| 249 | F | 120615 | 121022 | 408  | DNA polymerase IV (family X), NT domain |
| 250 | F | 121047 | 121265 | 219  |                                         |
| 251 | F | 121266 | 121499 | 234  |                                         |
| 252 | F | 121525 | 121788 | 264  |                                         |
| 253 | F | 121793 | 122053 | 261  |                                         |
| 254 | F | 122050 | 122274 | 225  |                                         |
| 255 | F | 122309 | 122551 | 243  |                                         |
| 256 | F | 122551 | 122820 | 270  |                                         |
| 257 | F | 122855 | 123091 | 237  |                                         |
| 258 | F | 123091 | 123330 | 240  |                                         |
| 259 | F | 123361 | 123825 | 465  |                                         |
| 260 | F | 123864 | 124262 | 399  |                                         |
| 261 | F | 124342 | 124503 | 162  |                                         |
| 262 | F | 124528 | 124704 | 177  |                                         |
| 263 | F | 124704 | 124985 | 282  |                                         |
| 264 | F | 125008 | 125205 | 198  |                                         |
| 265 | F | 125230 | 125382 | 153  |                                         |
| 266 | F | 125445 | 125654 | 210  |                                         |
| 267 | F | 125864 | 125953 | 90   |                                         |
| 268 | F | 126063 | 126158 | 96   |                                         |
| 269 | F | 126293 | 126421 | 129  |                                         |
| 270 | F | 126438 | 126656 | 219  |                                         |
| 271 | F | 126695 | 126976 | 282  |                                         |

|     |   |        |        |     |                  |
|-----|---|--------|--------|-----|------------------|
| 272 | F | 127022 | 127396 | 375 |                  |
| 273 | F | 127533 | 127754 | 222 |                  |
| 274 | F | 127803 | 127976 | 174 |                  |
| 275 | R | 128086 | 128202 | 117 |                  |
| 276 | R | 128372 | 128620 | 249 |                  |
| 277 | R | 128755 | 129183 | 429 |                  |
| 278 | R | 129226 | 129468 | 243 |                  |
| 279 | R | 129604 | 130428 | 825 |                  |
| 280 | R | 130462 | 130713 | 252 |                  |
| 281 | R | 130739 | 131074 | 336 |                  |
| 282 | R | 131256 | 131378 | 123 |                  |
| 283 | R | 131421 | 131786 | 366 |                  |
| 284 | R | 131899 | 132057 | 159 |                  |
| 285 | R | 132045 | 132311 | 267 |                  |
| 286 | R | 132449 | 132754 | 306 |                  |
| 287 | R | 132889 | 133302 | 414 |                  |
| 288 | R | 133345 | 133470 | 126 |                  |
| 289 | R | 133597 | 133920 | 324 |                  |
| 290 | R | 134032 | 134178 | 147 |                  |
| 291 | R | 134175 | 134510 | 336 |                  |
| 292 | R | 134655 | 134870 | 216 |                  |
| 293 | R | 134881 | 134991 | 111 |                  |
| 294 | R | 135168 | 135851 | 684 | Endonuclease III |
| 295 | R | 135988 | 136401 | 414 |                  |
| 296 | R | 136567 | 137034 | 468 |                  |
| 297 | R | 137166 | 137558 | 393 |                  |
| 298 | R | 137680 | 137946 | 267 |                  |
| 299 | R | 138080 | 138325 | 246 |                  |
| 300 | R | 138450 | 138887 | 438 |                  |
| 301 | R | 139018 | 139137 | 120 |                  |
| 302 | R | 139137 | 139430 | 294 |                  |
| 303 | R | 139464 | 139673 | 210 |                  |
| 304 | R | 139678 | 139761 | 84  |                  |
| 305 | R | 139834 | 140121 | 288 |                  |
| 306 | R | 140281 | 140463 | 183 |                  |
| 307 | R | 140592 | 140852 | 261 |                  |
| 308 | R | 140988 | 141239 | 252 |                  |
| 309 | R | 141425 | 141697 | 273 |                  |
| 310 | R | 141715 | 141873 | 159 |                  |
| 311 | R | 141915 | 142055 | 141 |                  |
| 312 | R | 142080 | 142283 | 204 |                  |
| 313 | R | 142387 | 143091 | 705 |                  |
| 314 | R | 143417 | 143635 | 219 |                  |
| 315 | R | 48164  | 48246  | 83  | tRNA Ser (gct)   |



|     |   |       |       |    |                |
|-----|---|-------|-------|----|----------------|
| 316 | R | 48384 | 48468 | 85 | tRNA Ser (cga) |
| 317 | R | 52081 | 52168 | 88 | tRNA Ala (agc) |

**Table S7.** HHTV-1 genome features.

| <b>ORF number</b> | <b>Direction</b> | <b>Start</b> | <b>Stop</b> | <b>Length (nt)</b> | <b>Function</b>          |
|-------------------|------------------|--------------|-------------|--------------------|--------------------------|
| 1                 | F                | 1            | 594         | 594                |                          |
| 2                 | F                | 594          | 818         | 225                |                          |
| 3                 | F                | 815          | 1495        | 681                |                          |
| 4                 | F                | 1492         | 1821        | 330                |                          |
| 5                 | F                | 1818         | 2087        | 270                |                          |
| 6                 | F                | 2155         | 2457        | 303                |                          |
| 7                 | F                | 2447         | 2848        | 402                |                          |
| 8                 | F                | 2848         | 3039        | 192                |                          |
| 9                 | F                | 3036         | 4901        | 1866               | Terminase, large subunit |
| 10                | F                | 4947         | 6284        | 1338               |                          |
| 11                | F                | 6366         | 6557        | 192                |                          |
| 12                | F                | 6605         | 9439        | 2835               |                          |
| 13                | F                | 9436         | 12738       | 3303               |                          |
| 14                | F                | 12735        | 13022       | 288                |                          |
| 15                | F                | 13022        | 14008       | 987                | Mu gpF-like protein      |
| 16                | F                | 14114        | 14566       | 453                |                          |
| 17                | F                | 14563        | 14904       | 342                |                          |
| 18                | R                | 14886        | 15119       | 234                |                          |
| 19                | F                | 15199        | 16659       | 1461               |                          |
| 20                | F                | 16659        | 17066       | 408                |                          |
| 21                | F                | 17073        | 18173       | 1101               | Major Capsid             |
| 22                | F                | 18179        | 18595       | 417                |                          |
| 23                | F                | 18602        | 18958       | 357                |                          |
| 24                | F                | 18958        | 19437       | 480                |                          |
| 25                | F                | 19430        | 19957       | 528                |                          |
| 26                | F                | 19957        | 20505       | 549                |                          |
| 27                | F                | 20512        | 20985       | 474                |                          |
| 28                | F                | 20986        | 22005       | 1020               |                          |
| 29                | F                | 22013        | 22762       | 750                |                          |
| 30                | R                | 22832        | 22990       | 159                |                          |
| 31                | R                | 23156        | 23311       | 156                |                          |
| 32                | R                | 23314        | 23928       | 615                |                          |
| 33                | F                | 24105        | 24617       | 513                |                          |
| 34                | F                | 24625        | 25020       | 396                |                          |
| 35                | F                | 25013        | 27325       | 2313               | Tape Measure             |
| 36                | F                | 27332        | 29917       | 2586               | Laminin G domain         |
| 37                | F                | 29925        | 31043       | 1119               |                          |
| 38                | F                | 31107        | 31847       | 741                |                          |

|    |   |       |       |      |                             |
|----|---|-------|-------|------|-----------------------------|
| 39 | F | 31844 | 32461 | 618  |                             |
| 40 | F | 32482 | 34218 | 1737 |                             |
| 41 | F | 34312 | 34575 | 264  |                             |
| 42 | F | 34585 | 34842 | 258  |                             |
| 43 | F | 35069 | 35248 | 180  |                             |
| 44 | F | 35245 | 36072 | 828  |                             |
| 45 | F | 36225 | 36338 | 114  |                             |
| 46 | F | 36335 | 36532 | 198  |                             |
| 47 | F | 36529 | 36783 | 255  |                             |
| 48 | F | 36776 | 37126 | 351  |                             |
| 49 | F | 37126 | 37317 | 192  |                             |
| 50 | F | 37320 | 37475 | 156  |                             |
| 51 | F | 37472 | 37669 | 198  |                             |
| 52 | F | 37802 | 39052 | 1251 |                             |
| 53 | F | 39049 | 39399 | 351  |                             |
| 54 | F | 39482 | 40285 | 804  | PCNA                        |
| 55 | F | 40408 | 40647 | 240  |                             |
| 56 | F | 40640 | 41245 | 606  |                             |
| 57 | F | 41238 | 41399 | 162  |                             |
| 58 | F | 41392 | 41808 | 417  | GatB domain                 |
| 59 | F | 41805 | 41930 | 126  |                             |
| 60 | F | 41927 | 42586 | 660  |                             |
| 61 | F | 42583 | 42978 | 396  |                             |
| 62 | F | 42971 | 43408 | 438  |                             |
| 63 | F | 43398 | 43625 | 228  |                             |
| 64 | F | 43625 | 44113 | 489  |                             |
| 65 | F | 44106 | 44531 | 426  | Holliday junction resolvase |
| 66 | F | 44518 | 44736 | 219  |                             |
| 67 | F | 44733 | 45263 | 531  | DUF4326                     |
| 68 | F | 45263 | 45796 | 534  |                             |
| 69 | F | 45793 | 46326 | 534  |                             |
| 70 | F | 46323 | 46637 | 315  |                             |
| 71 | F | 46732 | 46893 | 162  |                             |
| 72 | F | 46924 | 47712 | 789  |                             |
| 73 | F | 47712 | 48311 | 600  | AdoMet-MTase                |
| 74 | F | 48308 | 48622 | 315  |                             |

**Table S8.** HHTV-2 genome features.

| ORF number | Direction | Start | Stop | Length (nt) | Function |
|------------|-----------|-------|------|-------------|----------|
| 1          | F         | 1     | 333  | 333         |          |
| 2          | F         | 416   | 1483 | 1068        |          |

|    |   |       |       |      |                                     |
|----|---|-------|-------|------|-------------------------------------|
| 3  | F | 1703  | 2989  | 1287 | Von Willebrand factor type A domain |
| 4  | F | 3024  | 3308  | 285  |                                     |
| 5  | F | 3305  | 3607  | 303  |                                     |
| 6  | F | 3604  | 3894  | 291  |                                     |
| 7  | F | 3891  | 4286  | 396  |                                     |
| 8  | F | 4283  | 5626  | 1344 |                                     |
| 9  | F | 5648  | 5941  | 294  |                                     |
| 10 | F | 5983  | 7365  | 1383 | AAA domain                          |
| 11 | F | 7504  | 7845  | 342  |                                     |
| 12 | F | 7842  | 8186  | 345  |                                     |
| 13 | F | 8183  | 8539  | 357  |                                     |
| 14 | F | 8517  | 8720  | 204  |                                     |
| 15 | F | 8734  | 9123  | 390  |                                     |
| 16 | F | 9120  | 9608  | 489  |                                     |
| 17 | F | 9850  | 10272 | 423  |                                     |
| 18 | F | 10259 | 10465 | 207  |                                     |
| 19 | F | 10465 | 10617 | 153  |                                     |
| 20 | F | 10614 | 11072 | 459  |                                     |
| 21 | F | 11128 | 11937 | 810  | ParB-like nuclease domain           |
| 22 | F | 11927 | 12790 | 864  |                                     |
| 23 | F | 12973 | 13530 | 558  |                                     |
| 24 | F | 13523 | 13645 | 123  |                                     |
| 25 | F | 13638 | 14093 | 456  |                                     |
| 26 | F | 14090 | 14389 | 300  |                                     |
| 27 | F | 14389 | 14523 | 135  |                                     |
| 28 | F | 14520 | 14936 | 417  |                                     |
| 29 | F | 15020 | 15235 | 216  |                                     |
| 30 | F | 15232 | 15666 | 435  |                                     |
| 31 | F | 15670 | 17364 | 1695 | Terminase, large subunit            |
| 32 | F | 17425 | 19815 | 2391 | Portal and Mu gpF-like protein      |
| 33 | F | 19815 | 20069 | 255  |                                     |
| 34 | F | 20070 | 21443 | 1374 |                                     |
| 35 | F | 21449 | 21730 | 282  |                                     |
| 36 | F | 21723 | 22085 | 363  | SNase-like protein                  |
| 37 | F | 22336 | 23463 | 1128 |                                     |
| 38 | F | 23711 | 25339 | 1629 | Prohead protease                    |
| 39 | F | 25341 | 26525 | 1185 | Major Capsid                        |
| 40 | F | 26537 | 26857 | 321  |                                     |
| 41 | F | 26902 | 27402 | 501  |                                     |
| 42 | F | 27408 | 28187 | 780  |                                     |
| 43 | F | 28187 | 28783 | 597  |                                     |
| 44 | F | 28780 | 29250 | 471  |                                     |
| 45 | F | 29258 | 29569 | 312  |                                     |
| 46 | F | 29578 | 30549 | 972  | Tail Tube                           |

|    |   |       |       |      |                             |
|----|---|-------|-------|------|-----------------------------|
| 47 | F | 30609 | 31067 | 459  |                             |
| 48 | F | 31076 | 31552 | 477  |                             |
| 49 | F | 31552 | 32811 | 1260 | Tape Measure                |
| 50 | F | 32814 | 33272 | 459  |                             |
| 51 | F | 33279 | 34730 | 1452 |                             |
| 52 | F | 34730 | 35509 | 780  |                             |
| 53 | F | 35510 | 36502 | 993  |                             |
| 54 | R | 36551 | 36859 | 309  |                             |
| 55 | R | 36846 | 37040 | 195  |                             |
| 56 | R | 37033 | 37401 | 369  |                             |
| 57 | R | 37398 | 37622 | 225  |                             |
| 58 | R | 37726 | 37914 | 189  |                             |
| 59 | R | 37911 | 38162 | 252  |                             |
| 60 | R | 38159 | 38392 | 234  |                             |
| 61 | R | 38397 | 38639 | 243  |                             |
| 62 | F | 38916 | 40463 | 1548 |                             |
| 63 | F | 40463 | 41593 | 1131 | Laminin G domain            |
| 64 | F | 41595 | 42368 | 774  |                             |
| 65 | F | 42373 | 42846 | 474  |                             |
| 66 | R | 42843 | 43247 | 405  | Holliday junction resolvase |
| 67 | R | 43240 | 43947 | 708  |                             |
| 68 | R | 43940 | 44155 | 216  |                             |
| 69 | R | 44148 | 44600 | 453  |                             |
| 70 | R | 44597 | 44749 | 153  |                             |
| 71 | R | 44730 | 45512 | 783  |                             |
| 72 | R | 45502 | 45777 | 276  |                             |
| 73 | R | 45770 | 46000 | 231  |                             |
| 74 | R | 45963 | 46334 | 372  |                             |
| 75 | R | 46304 | 46486 | 183  |                             |
| 76 | R | 46476 | 46829 | 354  |                             |
| 77 | R | 46822 | 46983 | 162  |                             |
| 78 | R | 46976 | 47242 | 267  |                             |
| 79 | R | 47332 | 47517 | 186  |                             |
| 80 | R | 47507 | 47794 | 288  |                             |
| 81 | R | 47787 | 48692 | 906  | SPFH/Band 7 domain          |
| 82 | R | 48689 | 48991 | 303  | HTH domain                  |
| 83 | R | 48984 | 49418 | 435  |                             |
| 84 | R | 49415 | 49639 | 225  |                             |
| 85 | R | 49632 | 50516 | 885  |                             |
| 86 | R | 50503 | 50724 | 222  |                             |
| 87 | R | 50721 | 51344 | 624  |                             |
| 88 | R | 51344 | 52507 | 1164 |                             |

**Table S9.** HRTV-4 genome features.

| <b>ORF number</b> | <b>Direction</b> | <b>Start</b> | <b>Stop</b> | <b>Length (nt)</b> | <b>Function</b>                |
|-------------------|------------------|--------------|-------------|--------------------|--------------------------------|
| 1                 | F                | 1            | 198         | 198                |                                |
| 2                 | F                | 195          | 380         | 186                |                                |
| 3                 | F                | 377          | 493         | 117                |                                |
| 4                 | F                | 614          | 862         | 249                |                                |
| 5                 | F                | 855          | 1487        | 633                |                                |
| 6                 | F                | 1484         | 1807        | 324                |                                |
| 7                 | F                | 1849         | 2388        | 540                |                                |
| 8                 | F                | 2563         | 2877        | 315                |                                |
| 9                 | F                | 2874         | 3125        | 252                |                                |
| 10                | F                | 3118         | 3690        | 573                |                                |
| 11                | F                | 3687         | 4262        | 576                |                                |
| 12                | F                | 4259         | 4570        | 312                |                                |
| 13                | F                | 4567         | 5283        | 717                | HTH domain                     |
| 14                | F                | 5280         | 5504        | 225                |                                |
| 15                | F                | 5501         | 5731        | 231                |                                |
| 16                | F                | 5724         | 5960        | 237                |                                |
| 17                | F                | 5953         | 6102        | 150                |                                |
| 18                | F                | 6099         | 6497        | 399                |                                |
| 19                | F                | 6494         | 7036        | 543                |                                |
| 20                | F                | 7073         | 7579        | 507                |                                |
| 21                | F                | 7579         | 8919        | 1341               | Terminase, large subunit       |
| 22                | F                | 8916         | 9197        | 282                |                                |
| 23                | F                | 9225         | 9446        | 222                |                                |
| 24                | F                | 9446         | 9580        | 135                |                                |
| 25                | F                | 9583         | 9741        | 159                |                                |
| 26                | F                | 9788         | 10003       | 216                |                                |
| 27                | F                | 10000        | 10119       | 120                |                                |
| 28                | F                | 10112        | 10210       | 99                 |                                |
| 29                | F                | 10207        | 10389       | 183                |                                |
| 30                | F                | 10427        | 12916       | 2490               | Portal and Mu gpF-like protein |
| 31                | F                | 12963        | 13097       | 135                |                                |
| 32                | F                | 13090        | 13452       | 363                |                                |
| 33                | F                | 13445        | 13618       | 174                |                                |
| 34                | F                | 13693        | 14040       | 348                |                                |
| 35                | F                | 14030        | 14152       | 123                |                                |
| 36                | F                | 14190        | 14387       | 198                | Endonuclease domain            |
| 37                | F                | 14387        | 15970       | 1584               |                                |
| 38                | F                | 16035        | 16442       | 408                |                                |
| 39                | F                | 16442        | 17701       | 1260               | Major Capsid                   |
| 40                | F                | 17783        | 18406       | 624                | HNH endonuclease domain        |
| 41                | F                | 18403        | 18786       | 384                |                                |

|    |   |       |       |      |                           |
|----|---|-------|-------|------|---------------------------|
| 42 | F | 18876 | 19409 | 534  |                           |
| 43 | F | 19453 | 19698 | 246  |                           |
| 44 | F | 19701 | 19865 | 165  |                           |
| 45 | F | 19862 | 20077 | 216  |                           |
| 46 | F | 20074 | 20307 | 234  |                           |
| 47 | F | 20350 | 21825 | 1476 | HTH domain                |
| 48 | F | 21943 | 22158 | 216  |                           |
| 49 | F | 22199 | 22624 | 426  |                           |
| 50 | F | 22624 | 23043 | 420  | DUF646                    |
| 51 | F | 23090 | 23236 | 147  |                           |
| 52 | F | 23233 | 23610 | 378  |                           |
| 53 | F | 23603 | 23866 | 264  |                           |
| 54 | F | 23859 | 24128 | 270  |                           |
| 55 | F | 24165 | 24377 | 213  |                           |
| 56 | F | 24356 | 24517 | 162  |                           |
| 57 | F | 24593 | 25102 | 510  |                           |
| 58 | F | 25121 | 25522 | 402  |                           |
| 59 | F | 25525 | 25845 | 321  |                           |
| 60 | F | 25845 | 26378 | 534  |                           |
| 61 | F | 26375 | 26587 | 213  |                           |
| 62 | F | 26696 | 27019 | 324  |                           |
| 63 | F | 27057 | 27527 | 471  | Tail Tube                 |
| 64 | F | 27531 | 27998 | 468  |                           |
| 65 | F | 27967 | 28140 | 174  |                           |
| 66 | F | 28182 | 28475 | 294  |                           |
| 67 | F | 28517 | 28729 | 213  |                           |
| 68 | F | 28777 | 29784 | 1008 | Tape measure              |
| 69 | F | 29785 | 30636 | 852  |                           |
| 70 | F | 30687 | 31139 | 453  |                           |
| 71 | F | 31142 | 32074 | 933  |                           |
| 72 | F | 32078 | 35350 | 3273 | Fibronectin type 3 domain |
| 73 | R | 35347 | 35646 | 300  | RelE                      |

**Table S10.** HRTV-5 genome features.

| <b>ORF number</b> | <b>Direction</b> | <b>Start</b> | <b>Stop</b> | <b>Length (nt)</b> | <b>Function</b> |
|-------------------|------------------|--------------|-------------|--------------------|-----------------|
| 1                 | R                | 363          | 845         | 483                |                 |
| 2                 | F                | 1241         | 2017        | 777                |                 |
| 3                 | F                | 2010         | 2273        | 264                |                 |
| 4                 | F                | 2336         | 2491        | 156                |                 |
| 5                 | F                | 2494         | 2688        | 195                |                 |
| 6                 | F                | 2726         | 2932        | 207                |                 |

|    |   |       |       |      |                                                |
|----|---|-------|-------|------|------------------------------------------------|
| 7  | F | 2936  | 3007  | 72   | tRNA Pro (tgg)                                 |
| 8  | F | 3024  | 4715  | 1692 | Terminase, large subunit                       |
| 9  | F | 4730  | 6169  | 1440 | Portal                                         |
| 10 | F | 6172  | 6456  | 285  |                                                |
| 11 | F | 6453  | 7217  | 765  | Prohead protease                               |
| 12 | F | 7224  | 7652  | 429  |                                                |
| 13 | F | 7675  | 8190  | 516  |                                                |
| 14 | F | 8232  | 9188  | 957  | Major Capsid                                   |
| 15 | F | 9234  | 9677  | 444  |                                                |
| 16 | F | 9677  | 10015 | 339  |                                                |
| 17 | F | 10018 | 13134 | 3117 |                                                |
| 18 | F | 13136 | 13357 | 222  |                                                |
| 19 | F | 13394 | 13903 | 510  | Tail Tube                                      |
| 20 | F | 13912 | 15204 | 1293 | Tail Sheath                                    |
| 21 | F | 15233 | 15778 | 546  |                                                |
| 22 | F | 15835 | 16305 | 471  |                                                |
| 23 | F | 16253 | 16615 | 363  |                                                |
| 24 | F | 16618 | 18435 | 1818 | Tape Measure                                   |
| 25 | F | 18436 | 18966 | 531  |                                                |
| 26 | F | 18963 | 20405 | 1443 |                                                |
| 27 | F | 20407 | 20844 | 438  |                                                |
| 28 | F | 20841 | 21206 | 366  |                                                |
| 29 | F | 21271 | 21597 | 327  |                                                |
| 30 | F | 21594 | 22829 | 1236 | Baseplate J-like protein                       |
| 31 | F | 22834 | 23484 | 651  |                                                |
| 32 | F | 23488 | 24897 | 1410 |                                                |
| 33 | F | 24912 | 26117 | 1206 |                                                |
| 34 | F | 26119 | 26502 | 384  |                                                |
| 35 | F | 26524 | 27015 | 492  |                                                |
| 36 | R | 27031 | 27873 | 843  |                                                |
| 37 | F | 27934 | 28059 | 126  |                                                |
| 38 | F | 28302 | 30722 | 2421 | Ribonucleotide reductase                       |
| 39 | R | 30729 | 31256 | 528  |                                                |
| 40 | R | 31274 | 32041 | 768  |                                                |
| 41 | R | 32132 | 32299 | 168  |                                                |
| 42 | R | 32312 | 36178 | 3867 | Restriction endonuclease and methylase domains |
| 43 | R | 36276 | 36476 | 201  |                                                |
| 44 | F | 36667 | 36738 | 72   | tRNA Thr (ggt)                                 |
| 45 | F | 36922 | 38115 | 1194 | Integrase                                      |
| 46 | R | 38116 | 38649 | 534  |                                                |
| 47 | R | 38677 | 40038 | 1362 | RtcB                                           |
| 48 | R | 40285 | 40497 | 213  |                                                |
| 49 | R | 40494 | 40751 | 258  |                                                |
| 50 | R | 40748 | 40933 | 186  |                                                |

|    |   |       |       |      |                                               |
|----|---|-------|-------|------|-----------------------------------------------|
| 51 | R | 40930 | 41358 | 429  |                                               |
| 52 | R | 41345 | 41902 | 558  | Trimeric dUTPase                              |
| 53 | R | 41899 | 42603 | 705  | Thymidylate synthase                          |
| 54 | R | 42600 | 42767 | 168  |                                               |
| 55 | R | 42857 | 45448 | 2592 | DNA polymerase, elongation subunit (family B) |
| 56 | R | 45539 | 46012 | 474  |                                               |
| 57 | R | 46005 | 46145 | 141  |                                               |
| 58 | R | 46194 | 47108 | 915  |                                               |
| 59 | R | 47122 | 47295 | 174  |                                               |
| 60 | R | 47292 | 47411 | 120  |                                               |
| 61 | R | 47404 | 47604 | 201  |                                               |
| 62 | R | 47604 | 48620 | 1017 | PD-(D/E)XK nuclease                           |
| 63 | R | 48613 | 48771 | 159  |                                               |
| 64 | R | 48768 | 48929 | 162  |                                               |
| 65 | R | 48926 | 49207 | 282  |                                               |
| 66 | R | 49191 | 49577 | 387  |                                               |
| 67 | R | 49596 | 49946 | 351  |                                               |
| 68 | R | 49948 | 50373 | 426  |                                               |
| 69 | R | 50462 | 51643 | 1182 | DNA polymerase II, small subunit              |
| 70 | R | 51640 | 52767 | 1128 |                                               |
| 71 | R | 52764 | 52976 | 213  |                                               |
| 72 | R | 53001 | 54482 | 1482 |                                               |
| 73 | R | 54560 | 54811 | 252  |                                               |
| 74 | R | 54843 | 55790 | 948  |                                               |
| 75 | R | 55871 | 55944 | 74   | tRNA Asn (gtt)                                |
| 76 | R | 56107 | 56319 | 213  |                                               |
| 77 | R | 56316 | 56447 | 132  |                                               |
| 78 | R | 56448 | 56858 | 411  |                                               |
| 79 | R | 57040 | 57174 | 135  |                                               |
| 80 | R | 57176 | 58048 | 873  | SPFH/Band 7 domain                            |
| 81 | R | 58092 | 58168 | 77   | tRNA Arg (tct)                                |
| 82 | F | 58365 | 58916 | 552  |                                               |
| 83 | R | 58913 | 59398 | 486  |                                               |
| 84 | F | 59689 | 60168 | 480  |                                               |
| 85 | F | 60165 | 60629 | 465  | Endonuclease                                  |
| 86 | R | 60940 | 61128 | 189  |                                               |
| 87 | R | 61121 | 61453 | 333  |                                               |
| 88 | R | 61450 | 61746 | 297  |                                               |
| 89 | R | 61743 | 62195 | 453  |                                               |
| 90 | R | 62192 | 62467 | 276  |                                               |
| 91 | R | 62464 | 62895 | 432  |                                               |
| 92 | R | 62895 | 63323 | 429  | HTH domain                                    |
| 93 | R | 63328 | 63462 | 135  |                                               |
| 94 | R | 63473 | 63739 | 267  |                                               |



|     |   |       |       |      |                           |
|-----|---|-------|-------|------|---------------------------|
| 95  | R | 63740 | 64138 | 399  |                           |
| 96  | R | 64188 | 65984 | 1797 | Rad3-related DNA helicase |
| 97  | R | 65988 | 66080 | 93   |                           |
| 98  | R | 66065 | 66238 | 174  |                           |
| 99  | R | 66239 | 66559 | 321  |                           |
| 100 | R | 66565 | 67326 | 762  |                           |
| 101 | R | 67357 | 68208 | 852  |                           |
| 102 | R | 68225 | 68413 | 189  |                           |
| 103 | R | 68413 | 68589 | 177  | DNA ligase                |
| 104 | R | 68589 | 68741 | 153  |                           |
| 105 | R | 68732 | 68878 | 147  |                           |
| 106 | R | 68871 | 69140 | 270  |                           |
| 107 | R | 69137 | 69502 | 366  |                           |
| 108 | R | 69521 | 70189 | 669  |                           |
| 109 | R | 70189 | 70308 | 120  |                           |
| 110 | R | 70308 | 70556 | 249  |                           |
| 111 | R | 70560 | 70667 | 108  |                           |
| 112 | R | 70667 | 70942 | 276  |                           |
| 113 | R | 70939 | 71082 | 144  |                           |
| 114 | R | 71079 | 71300 | 222  |                           |
| 115 | R | 71313 | 71453 | 141  |                           |
| 116 | R | 71461 | 71829 | 369  |                           |
| 117 | R | 71855 | 72214 | 360  |                           |
| 118 | R | 72315 | 72443 | 129  |                           |
| 119 | R | 72534 | 72893 | 360  |                           |
| 120 | R | 72890 | 73219 | 330  |                           |
| 121 | R | 73322 | 74278 | 957  |                           |
| 122 | F | 75714 | 76049 | 336  |                           |

**Table S11.** HRTV-7 genome features.

| <b>ORF number</b> | <b>Direction</b> | <b>Start</b> | <b>Stop</b> | <b>Length (nt)</b> | <b>Function</b>          |
|-------------------|------------------|--------------|-------------|--------------------|--------------------------|
| 1                 | F                | 898          | 1785        | 888                |                          |
| 2                 | F                | 1778         | 2065        | 288                |                          |
| 3                 | F                | 2072         | 2194        | 123                |                          |
| 4                 | F                | 2187         | 2516        | 330                |                          |
| 5                 | F                | 2545         | 2772        | 228                |                          |
| 6                 | F                | 2769         | 2978        | 210                |                          |
| 7                 | F                | 2991         | 4763        | 1773               | Terminase, large subunit |
| 8                 | F                | 4770         | 6287        | 1518               | Portal                   |
| 9                 | F                | 6290         | 6574        | 285                |                          |
| 10                | F                | 6571         | 7731        | 1161               | Prohead protease         |

|    |   |       |       |      |                                               |
|----|---|-------|-------|------|-----------------------------------------------|
| 11 | F | 7740  | 8213  | 474  |                                               |
| 12 | F | 8217  | 8753  | 537  |                                               |
| 13 | F | 8800  | 9774  | 975  | Major Capsid                                  |
| 14 | F | 9788  | 10264 | 477  |                                               |
| 15 | F | 10251 | 10640 | 390  |                                               |
| 16 | F | 10647 | 12119 | 1473 |                                               |
| 17 | F | 12109 | 12339 | 231  |                                               |
| 18 | F | 12340 | 12555 | 216  |                                               |
| 19 | F | 12559 | 13071 | 513  | Tail Tube                                     |
| 20 | F | 13079 | 14392 | 1314 | Tail Sheath                                   |
| 21 | F | 14421 | 14909 | 489  |                                               |
| 22 | F | 14949 | 15482 | 534  |                                               |
| 23 | F | 15445 | 15780 | 336  |                                               |
| 24 | F | 15784 | 17748 | 1965 | Tape Measure                                  |
| 25 | F | 17748 | 18275 | 528  |                                               |
| 26 | F | 18280 | 19800 | 1521 |                                               |
| 27 | F | 19849 | 20259 | 411  |                                               |
| 28 | F | 20259 | 20624 | 366  |                                               |
| 29 | F | 20626 | 20955 | 330  |                                               |
| 30 | F | 20957 | 22246 | 1290 | Baseplate J-like protein                      |
| 31 | F | 22252 | 22944 | 693  |                                               |
| 32 | F | 22948 | 24363 | 1416 |                                               |
| 33 | F | 24366 | 25355 | 990  |                                               |
| 34 | F | 25355 | 25699 | 345  |                                               |
| 35 | F | 25701 | 26207 | 507  |                                               |
| 36 | F | 26222 | 26356 | 135  |                                               |
| 37 | R | 26517 | 26654 | 138  |                                               |
| 38 | R | 26718 | 27608 | 891  |                                               |
| 39 | R | 28026 | 28757 | 732  | Thymidylate synthase                          |
| 40 | R | 28966 | 29082 | 117  |                                               |
| 41 | R | 29060 | 29251 | 192  |                                               |
| 42 | R | 29251 | 31902 | 2652 | DNA polymerase, elongation subunit (family B) |
| 43 | R | 31899 | 32330 | 432  |                                               |
| 44 | R | 32297 | 32686 | 390  |                                               |
| 45 | R | 32683 | 32868 | 186  |                                               |
| 46 | R | 32961 | 33716 | 756  | AAA domain                                    |
| 47 | R | 33716 | 33874 | 159  |                                               |
| 48 | R | 33983 | 34432 | 450  | Ser/Thr and Tyr protein phosphatase           |
| 49 | R | 34429 | 34551 | 123  |                                               |
| 50 | R | 34586 | 35251 | 666  | HNH endonuclease domain                       |
| 51 | R | 35248 | 36309 | 1062 | PD-(D/E)XK nuclease                           |
| 52 | R | 36302 | 36541 | 240  |                                               |
| 53 | R | 36534 | 36698 | 165  |                                               |
| 54 | R | 36688 | 36906 | 219  |                                               |

|    |   |       |       |      |                                  |
|----|---|-------|-------|------|----------------------------------|
| 55 | R | 36906 | 37052 | 147  |                                  |
| 56 | R | 37042 | 37455 | 414  |                                  |
| 57 | R | 37457 | 37798 | 342  |                                  |
| 58 | R | 37887 | 38267 | 381  |                                  |
| 59 | R | 38269 | 38595 | 327  |                                  |
| 60 | R | 38702 | 39964 | 1263 | DNA polymerase II, small subunit |
| 61 | R | 40029 | 41291 | 1263 |                                  |
| 62 | R | 41288 | 41479 | 192  |                                  |
| 63 | R | 41476 | 42957 | 1482 | Winged-helix domain              |
| 64 | R | 43036 | 43335 | 300  |                                  |
| 65 | R | 43328 | 43750 | 423  |                                  |
| 66 | R | 43750 | 44847 | 1098 |                                  |
| 67 | R | 45281 | 45787 | 507  |                                  |
| 68 | R | 45813 | 45885 | 73   | tRNA Gln (ttg)                   |
| 69 | F | 46461 | 47069 | 609  |                                  |
| 70 | R | 47066 | 47554 | 489  |                                  |
| 71 | F | 47897 | 48415 | 519  |                                  |
| 72 | F | 48415 | 48900 | 486  | ERCC4-type nuclease              |
| 73 | F | 49220 | 50383 | 1164 | Integrase                        |
| 74 | R | 50380 | 50652 | 273  |                                  |
| 75 | R | 50649 | 50834 | 186  |                                  |
| 76 | R | 50831 | 51253 | 423  | HTH domain                       |
| 77 | R | 51250 | 51471 | 222  |                                  |
| 78 | R | 51468 | 51647 | 180  |                                  |
| 79 | R | 51652 | 52083 | 432  |                                  |
| 80 | R | 52076 | 52333 | 258  |                                  |
| 81 | R | 52380 | 52679 | 300  |                                  |
| 82 | R | 52750 | 52914 | 165  |                                  |
| 83 | R | 52911 | 53153 | 243  |                                  |
| 84 | R | 53160 | 54584 | 1425 |                                  |
| 85 | R | 54610 | 55254 | 645  | LAGLIDADG endonuclease           |
| 86 | R | 55299 | 55493 | 195  |                                  |
| 87 | R | 55490 | 55669 | 180  |                                  |
| 88 | R | 55666 | 55875 | 210  |                                  |
| 89 | R | 55872 | 56330 | 459  |                                  |
| 90 | R | 56335 | 56631 | 297  |                                  |
| 91 | R | 56771 | 57679 | 909  |                                  |
| 92 | R | 57776 | 58465 | 690  |                                  |
| 93 | R | 58458 | 58559 | 102  |                                  |
| 94 | R | 58561 | 61401 | 2841 | HSP90 chaperone                  |
| 95 | R | 61391 | 61705 | 315  |                                  |
| 96 | R | 61769 | 61942 | 174  |                                  |
| 97 | R | 61942 | 62736 | 795  |                                  |
| 98 | R | 62733 | 62969 | 237  |                                  |

|     |   |       |       |      |  |
|-----|---|-------|-------|------|--|
| 99  | R | 62966 | 63256 | 291  |  |
| 100 | R | 63360 | 63542 | 183  |  |
| 101 | R | 63543 | 63866 | 324  |  |
| 102 | R | 63859 | 64137 | 279  |  |
| 103 | R | 64137 | 64595 | 459  |  |
| 104 | R | 64631 | 65680 | 1050 |  |
| 105 | R | 66025 | 66168 | 144  |  |
| 106 | R | 67667 | 68428 | 762  |  |

**Table S12.** HRTV-8 genome features.

| <b>ORF number</b> | <b>Direction</b> | <b>Start</b> | <b>Stop</b> | <b>Length (nt)</b> | <b>Function</b>          |
|-------------------|------------------|--------------|-------------|--------------------|--------------------------|
| 1                 | R                | 394          | 945         | 552                |                          |
| 2                 | F                | 1305         | 2081        | 777                |                          |
| 3                 | F                | 2083         | 2337        | 255                |                          |
| 4                 | F                | 2400         | 2555        | 156                |                          |
| 5                 | F                | 2558         | 2752        | 195                |                          |
| 6                 | F                | 2789         | 2995        | 207                |                          |
| 7                 | F                | 3000         | 3074        | 75                 | tRNA Pro (tgg)           |
| 8                 | F                | 3088         | 4785        | 1698               | Terminase, large subunit |
| 9                 | F                | 4800         | 6239        | 1440               | Portal                   |
| 10                | F                | 6239         | 6529        | 291                |                          |
| 11                | F                | 6526         | 7287        | 762                | Prohead protease         |
| 12                | F                | 7294         | 7725        | 432                |                          |
| 13                | F                | 7749         | 8264        | 516                |                          |
| 14                | F                | 8306         | 9262        | 957                | Major Capsid             |
| 15                | F                | 9308         | 9748        | 441                |                          |
| 16                | F                | 9748         | 10092       | 345                |                          |
| 17                | F                | 10095        | 13208       | 3114               |                          |
| 18                | F                | 13210        | 13431       | 222                |                          |
| 19                | F                | 13468        | 13977       | 510                | Tail Tube                |
| 20                | F                | 13987        | 15279       | 1293               | Tail Sheath              |
| 21                | F                | 15308        | 15853       | 546                |                          |
| 22                | F                | 15908        | 16378       | 471                |                          |
| 23                | F                | 16455        | 16691       | 237                |                          |
| 24                | F                | 16694        | 18514       | 1821               | Tape Measure             |
| 25                | F                | 18515        | 19078       | 564                |                          |
| 26                | F                | 19075        | 20508       | 1434               |                          |
| 27                | F                | 20511        | 20951       | 441                |                          |
| 28                | F                | 20948        | 21310       | 363                |                          |
| 29                | F                | 21375        | 21701       | 327                |                          |
| 30                | F                | 21698        | 22933       | 1236               | Baseplate J-like protein |

|    |   |       |       |      |                                               |
|----|---|-------|-------|------|-----------------------------------------------|
| 31 | F | 22938 | 23591 | 654  |                                               |
| 32 | F | 23592 | 25001 | 1410 |                                               |
| 33 | F | 25016 | 26221 | 1206 |                                               |
| 34 | F | 26223 | 26606 | 384  |                                               |
| 35 | F | 26628 | 27119 | 492  |                                               |
| 36 | R | 27135 | 27971 | 837  |                                               |
| 37 | F | 28038 | 28163 | 126  |                                               |
| 38 | F | 28401 | 30818 | 2418 | Ribonucleotide reductase                      |
| 39 | R | 30916 | 31104 | 189  |                                               |
| 40 | F | 31306 | 31376 | 71   | tRNA Thr (ggt)                                |
| 41 | F | 31560 | 32753 | 1194 | Integrase                                     |
| 42 | R | 32755 | 33240 | 486  |                                               |
| 43 | R | 33371 | 33661 | 291  | HNH endonuclease                              |
| 44 | R | 33663 | 35027 | 1365 | RtcB                                          |
| 45 | R | 35275 | 35487 | 213  |                                               |
| 46 | R | 35477 | 35671 | 195  |                                               |
| 47 | R | 35668 | 35880 | 213  |                                               |
| 48 | R | 35877 | 36308 | 432  |                                               |
| 49 | R | 36305 | 36853 | 549  | Trimeric dUTPase                              |
| 50 | R | 36850 | 37554 | 705  | Thymidylate synthase                          |
| 51 | R | 37557 | 37745 | 189  |                                               |
| 52 | R | 37738 | 37902 | 165  |                                               |
| 53 | R | 37996 | 38376 | 381  |                                               |
| 54 | R | 38456 | 38554 | 99   |                                               |
| 55 | R | 38551 | 38727 | 177  |                                               |
| 56 | R | 38736 | 41327 | 2592 | DNA polymerase, elongation subunit (family B) |
| 57 | R | 41418 | 41891 | 474  |                                               |
| 58 | R | 42073 | 42987 | 915  |                                               |
| 59 | R | 43001 | 43174 | 174  |                                               |
| 60 | R | 43171 | 43299 | 129  |                                               |
| 61 | R | 43292 | 43492 | 201  |                                               |
| 62 | R | 43492 | 43704 | 213  |                                               |
| 63 | R | 43697 | 43876 | 180  |                                               |
| 64 | R | 43876 | 44004 | 129  |                                               |
| 65 | R | 44004 | 45020 | 1017 | PD-(D/E)XK nuclease                           |
| 66 | R | 45001 | 45171 | 171  |                                               |
| 67 | R | 45168 | 45329 | 162  |                                               |
| 68 | R | 45326 | 45607 | 282  |                                               |
| 69 | R | 45591 | 45977 | 387  |                                               |
| 70 | R | 45993 | 46343 | 351  |                                               |
| 71 | R | 46345 | 46770 | 426  |                                               |
| 72 | R | 46859 | 48037 | 1179 | archeal DNA polymerase II, small subunit      |
| 73 | R | 48034 | 49272 | 1239 |                                               |
| 74 | R | 49398 | 50882 | 1485 |                                               |

|     |   |       |       |      |                           |
|-----|---|-------|-------|------|---------------------------|
| 75  | R | 50960 | 51205 | 246  |                           |
| 76  | R | 51237 | 52190 | 954  |                           |
| 77  | R | 52419 | 52496 | 78   | tRNA Asn (gtt)            |
| 78  | R | 52659 | 52868 | 210  |                           |
| 79  | R | 52865 | 52996 | 132  |                           |
| 80  | R | 52997 | 53539 | 543  |                           |
| 81  | R | 53632 | 53707 | 76   | tRNA Gly (tcc)            |
| 82  | R | 53726 | 53860 | 135  |                           |
| 83  | R | 53862 | 54929 | 1068 | SPFH/Band 7 domain        |
| 84  | F | 55034 | 55585 | 552  |                           |
| 85  | R | 55582 | 56067 | 486  |                           |
| 86  | F | 56357 | 56836 | 480  |                           |
| 87  | F | 56833 | 57297 | 465  | Endonuclease              |
| 88  | F | 57338 | 57799 | 462  |                           |
| 89  | R | 57811 | 57972 | 162  |                           |
| 90  | R | 57965 | 58303 | 339  |                           |
| 91  | R | 58303 | 58599 | 297  |                           |
| 92  | R | 58596 | 59120 | 525  |                           |
| 93  | R | 59154 | 59435 | 282  |                           |
| 94  | R | 59432 | 59569 | 138  |                           |
| 95  | R | 59573 | 59998 | 426  |                           |
| 96  | R | 60001 | 60423 | 423  | HTH domain                |
| 97  | R | 60423 | 60599 | 177  |                           |
| 98  | R | 60596 | 60733 | 138  |                           |
| 99  | R | 60733 | 60882 | 150  |                           |
| 100 | R | 60884 | 61150 | 267  |                           |
| 101 | R | 61151 | 61549 | 399  |                           |
| 102 | R | 61599 | 63395 | 1797 | Rad3-related DNA helicase |
| 103 | R | 63475 | 63684 | 210  |                           |
| 104 | R | 63875 | 64027 | 153  |                           |
| 105 | R | 64027 | 64356 | 330  |                           |
| 106 | R | 64364 | 65017 | 654  |                           |
| 107 | R | 65025 | 65474 | 450  |                           |
| 108 | R | 65715 | 66566 | 852  |                           |
| 109 | R | 66576 | 66761 | 186  |                           |
| 110 | R | 66761 | 66937 | 177  | DNA ligase                |
| 111 | R | 66937 | 67089 | 153  |                           |
| 112 | R | 67080 | 67226 | 147  |                           |
| 113 | R | 67219 | 67488 | 270  |                           |
| 114 | R | 67485 | 67808 | 324  |                           |
| 115 | R | 67805 | 68176 | 372  |                           |
| 116 | R | 68195 | 68863 | 669  |                           |
| 117 | R | 68863 | 68982 | 120  |                           |
| 118 | R | 68982 | 69230 | 249  |                           |

|     |   |       |       |     |  |
|-----|---|-------|-------|-----|--|
| 119 | R | 69234 | 69341 | 108 |  |
| 120 | R | 69341 | 69613 | 273 |  |
| 121 | R | 69610 | 69762 | 153 |  |
| 122 | R | 69759 | 69977 | 219 |  |
| 123 | R | 69990 | 70130 | 141 |  |
| 124 | R | 70139 | 70429 | 291 |  |
| 125 | R | 70716 | 71063 | 348 |  |
| 126 | R | 71069 | 71398 | 330 |  |
| 127 | R | 71398 | 71529 | 132 |  |
| 128 | R | 71632 | 72588 | 957 |  |

**Table S13.** Haloarchaeal tailed virus ORF phamilies.

| pham | number of members | HCTV-1 | HCTV-2 | HCTV-5 | HF1     | HF2                | HGTV-1 | HHTV-1 | HHTV-2 | HRTV-4 | HRTV-5                  | HRTV-7                  | HRTV-8                  |
|------|-------------------|--------|--------|--------|---------|--------------------|--------|--------|--------|--------|-------------------------|-------------------------|-------------------------|
| 1    | 4                 |        |        |        | HF1_106 | HF2_119            |        |        |        |        | HRTV-5_1                |                         | HRTV-8_1                |
| 2    | 5                 |        |        |        | HF1_105 | HF2_118            |        |        |        |        | HRTV-5_2                | HRTV-7_1                | HRTV-8_2                |
| 3    | 5                 |        |        |        | HF1_104 | HF2_117            |        |        |        |        | HRTV-5_3                | HRTV-7_2                | HRTV-8_3                |
| 4    | 5                 |        |        |        | HF1_102 | HF2_116            |        |        |        |        | HRTV-5_4                | HRTV-7_3                | HRTV-8_4                |
| 5    | 4                 |        |        |        | HF1_101 | HF2_115            |        |        |        |        | HRTV-5_5                |                         | HRTV-8_5                |
| 6    | 4                 |        |        |        | HF1_100 | HF2_114            |        |        |        |        | HRTV-5_6                |                         | HRTV-8_6                |
| 7    | 5                 |        |        |        | HF1_98  | HF2_112            |        |        |        |        | HRTV-5_8                | HRTV-7_7                | HRTV-8_8                |
| 8    | 5                 |        |        |        | HF1_97  | HF2_111            |        |        |        |        | HRTV-5_9                | HRTV-7_8                | HRTV-8_9                |
| 9    | 4                 |        |        |        | HF1_96  | HF2_110            |        |        |        |        | HRTV-5_10               |                         | HRTV-8_10               |
| 10   | 5                 |        |        |        | HF1_95  | HF2_109            |        |        |        |        | HRTV-5_11               | HRTV-7_10               | HRTV-8_11               |
| 11   | 5                 |        |        |        | HF1_94  | HF2_108            |        |        |        |        | HRTV-5_12               | HRTV-7_11               | HRTV-8_12               |
| 12   | 5                 |        |        |        | HF1_93  | HF2_107            |        |        |        |        | HRTV-5_13               | HRTV-7_12               | HRTV-8_13               |
| 13   | 6                 |        |        |        | HF1_92  | HF2_105<br>HF2_106 |        |        |        |        | HRTV-5_14               | HRTV-7_13               | HRTV-8_14               |
| 14   | 9                 |        |        |        | HF1_91  | HF2_103<br>HF2_104 |        |        |        |        | HRTV-5_15,<br>HRTV-5_16 | HRTV-7_14,<br>HRTV-7_15 | HRTV-8_15,<br>HRTV-8_16 |
| 15   | 4                 |        |        |        | HF1_90  | HF2_102            |        |        |        |        | HRTV-5_17               |                         | HRTV-8_17               |
| 16   | 4                 |        |        |        | HF1_89  | HF2_101            |        |        |        |        | HRTV-5_18               |                         | HRTV-8_18               |
| 17   | 5                 |        |        |        | HF1_88  | HF2_100            |        |        |        |        | HRTV-5_19               | HRTV-7_19               | HRTV-8_19               |
| 18   | 5                 |        |        |        | HF1_87  | HF2_99             |        |        |        |        | HRTV-5_20               | HRTV-7_20               | HRTV-8_20               |
| 19   | 5                 |        |        |        | HF1_86  | HF2_98             |        |        |        |        | HRTV-5_21               | HRTV-7_21               | HRTV-8_21               |
| 20   | 5                 |        |        |        | HF1_85  | HF2_97             |        |        |        |        | HRTV-5_22               | HRTV-7_22               | HRTV-8_22               |
| 21   | 5                 |        |        |        | HF1_84  | HF2_96             |        |        |        |        | HRTV-5_23               | HRTV-7_23               | HRTV-8_23               |
| 22   | 4                 |        |        |        | HF1_83  | HF2_95             |        |        |        |        | HRTV-5_24               |                         | HRTV-8_24               |
| 23   | 5                 |        |        |        | HF1_82  | HF2_94             |        |        |        |        | HRTV-5_25               | HRTV-7_25               | HRTV-8_25               |
| 24   | 5                 |        |        |        | HF1_81  | HF2_93             |        |        |        |        | HRTV-5_26               | HRTV-7_26               | HRTV-8_26               |
| 25   | 5                 |        |        |        | HF1_80  | HF2_92             |        |        |        |        | HRTV-5_27               | HRTV-7_27               | HRTV-8_27               |



|    |   |            |  |            |        |        |            |  |  |           |  |           |           |           |
|----|---|------------|--|------------|--------|--------|------------|--|--|-----------|--|-----------|-----------|-----------|
| 26 | 5 |            |  |            | HF1 79 | HF2 90 |            |  |  |           |  | HRTV-5 28 | HRTV-7 28 | HRTV-8 28 |
| 27 | 5 |            |  |            | HF1 78 | HF2 89 |            |  |  |           |  | HRTV-5 29 | HRTV-7 29 | HRTV-8 29 |
| 28 | 5 |            |  |            | HF1 77 | HF2 88 |            |  |  |           |  | HRTV-5 30 | HRTV-7 30 | HRTV-8 30 |
| 29 | 5 |            |  |            | HF1 76 | HF2 87 |            |  |  |           |  | HRTV-5 31 | HRTV-7 31 | HRTV-8 31 |
| 30 | 5 |            |  |            | HF1 75 | HF2 86 |            |  |  |           |  | HRTV-5 32 | HRTV-7 32 | HRTV-8 32 |
| 31 | 5 |            |  |            | HF1 74 | HF2 85 |            |  |  |           |  | HRTV-5 33 | HRTV-7 33 | HRTV-8 33 |
| 32 | 4 |            |  |            |        | HF2 83 |            |  |  |           |  | HRTV-5 34 | HRTV-7 34 | HRTV-8 34 |
| 33 | 5 |            |  |            | HF1 73 | HF2 82 |            |  |  |           |  | HRTV-5 35 | HRTV-7 35 | HRTV-8 35 |
| 34 | 5 |            |  |            | HF1 72 | HF2 81 |            |  |  |           |  | HRTV-5 36 | HRTV-7 38 | HRTV-8 36 |
| 35 | 3 |            |  |            |        |        |            |  |  |           |  | HRTV-5 37 | HRTV-7 36 | HRTV-8 37 |
| 36 | 7 | HCTV-1 26  |  | HCTV-5 25  | HF1 70 | HF2 79 | HGTV-1 108 |  |  |           |  | HRTV-5 38 |           | HRTV-8 38 |
| 37 | 1 |            |  |            |        |        |            |  |  |           |  | HRTV-5 39 |           |           |
| 38 | 1 |            |  |            |        |        |            |  |  |           |  | HRTV-5 40 |           |           |
| 39 | 1 |            |  |            |        |        |            |  |  |           |  | HRTV-5 41 |           |           |
| 40 | 3 |            |  |            | HF1 69 | HF2 78 |            |  |  |           |  | HRTV-5 42 |           |           |
| 41 | 4 |            |  |            | HF1 68 | HF2 77 |            |  |  |           |  | HRTV-5 43 |           | HRTV-8 39 |
| 42 | 5 |            |  |            | HF1 67 | HF2 74 |            |  |  |           |  | HRTV-5 45 | HRTV-7 73 | HRTV-8 41 |
| 43 | 4 |            |  |            | HF1 66 | HF2 73 |            |  |  |           |  | HRTV-5 46 |           | HRTV-8 42 |
| 44 | 7 | HCTV-1 47  |  | HCTV-5 45  | HF1 65 | HF2 72 | HGTV-1 140 |  |  |           |  | HRTV-5 47 |           | HRTV-8 44 |
| 45 | 3 |            |  |            |        | HF2 71 |            |  |  |           |  | HRTV-5 48 |           | HRTV-8 45 |
| 46 | 5 |            |  |            | HF1 64 | HF2 70 | HGTV-1 256 |  |  | HHTV-2 80 |  | HRTV-5 49 |           |           |
| 47 | 4 |            |  |            | HF1 63 | HF2 69 |            |  |  |           |  | HRTV-5 50 |           | HRTV-8 46 |
| 48 | 4 |            |  |            | HF1 61 | HF2 67 |            |  |  |           |  | HRTV-5 51 |           | HRTV-8 48 |
| 49 | 7 | HCTV-1 146 |  | HCTV-5 153 | HF1 60 | HF2 66 | HGTV-1 107 |  |  |           |  | HRTV-5 52 |           | HRTV-8 49 |
| 50 | 8 | HCTV-1 38  |  | HCTV-5 39  | HF1 59 | HF2 65 | HGTV-1 117 |  |  |           |  | HRTV-5 53 | HRTV-7 39 | HRTV-8 50 |
| 51 | 4 |            |  |            | HF1 58 | HF2 64 |            |  |  |           |  | HRTV-5 54 |           | HRTV-8 52 |
| 52 | 8 | HCTV-1 85  |  | HCTV-5 88  | HF1 57 | HF2 63 | HGTV-1 49  |  |  |           |  | HRTV-5 55 | HRTV-7 42 | HRTV-8 56 |
| 53 | 4 |            |  |            | HF1 55 | HF2 61 |            |  |  |           |  | HRTV-5 56 |           | HRTV-8 57 |
| 54 | 1 |            |  |            |        |        |            |  |  |           |  | HRTV-5 57 |           |           |
| 55 | 4 |            |  |            | HF1 54 | HF2 60 |            |  |  |           |  | HRTV-5 58 |           | HRTV-8 58 |

|    |   |  |  |  |        |        |            |  |  |  |                          |           |                          |
|----|---|--|--|--|--------|--------|------------|--|--|--|--------------------------|-----------|--------------------------|
| 56 | 2 |  |  |  |        |        |            |  |  |  | HRTV-5 59                |           | HRTV-8 59                |
| 57 | 2 |  |  |  |        |        |            |  |  |  | HRTV-5 60                |           | HRTV-8 60                |
| 58 | 4 |  |  |  | HF1 53 | HF2 59 |            |  |  |  | HRTV-5 61                |           | HRTV-8 61                |
| 59 | 5 |  |  |  | HF1 49 | HF2 55 |            |  |  |  | HRTV-5 62                | HRTV-7 51 | HRTV-8 65                |
| 60 | 5 |  |  |  | HF1 47 | HF2 53 |            |  |  |  | HRTV-5 63                | HRTV-7 52 | HRTV-8 66                |
| 61 | 5 |  |  |  | HF1 46 | HF2 52 |            |  |  |  | HRTV-5 64                | HRTV-7 53 | HRTV-8 67                |
| 62 | 4 |  |  |  | HF1 45 | HF2 51 |            |  |  |  | HRTV-5 65                |           | HRTV-8 68                |
| 63 | 4 |  |  |  | HF1 44 | HF2 50 |            |  |  |  | HRTV-5 66                |           | HRTV-8 69                |
| 64 | 5 |  |  |  | HF1 43 | HF2 49 |            |  |  |  | HRTV-5 67                | HRTV-7 58 | HRTV-8 70                |
| 65 | 4 |  |  |  | HF1 42 | HF2 48 |            |  |  |  | HRTV-5 68                |           | HRTV-8 71                |
| 66 | 5 |  |  |  | HF1 41 | HF2 47 |            |  |  |  | HRTV-5 69                | HRTV-7 60 | HRTV-8 72                |
| 67 | 5 |  |  |  | HF1 40 | HF2 46 |            |  |  |  | HRTV-5 70                | HRTV-7 61 | HRTV-8 73                |
| 68 | 1 |  |  |  |        |        |            |  |  |  | HRTV-5 71                |           |                          |
| 69 | 5 |  |  |  | HF1 39 | HF2 45 |            |  |  |  | HRTV-5 72                | HRTV-7 63 | HRTV-8 74                |
| 70 | 4 |  |  |  | HF1 38 | HF2 44 |            |  |  |  | HRTV-5 73                |           | HRTV-8 75                |
| 71 | 4 |  |  |  | HF1 37 | HF2 43 |            |  |  |  | HRTV-5 74                |           | HRTV-8 76                |
| 72 | 4 |  |  |  | HF1 34 | HF2 40 |            |  |  |  | HRTV-5 76                |           | HRTV-8 78                |
| 73 | 6 |  |  |  | HF1 33 | HF2 39 |            |  |  |  | HRTV-5_114,<br>HRTV-5 77 |           | HRTV-8_122,<br>HRTV-8 79 |
| 74 | 4 |  |  |  | HF1 32 | HF2 38 |            |  |  |  | HRTV-5 78                |           | HRTV-8 80                |
| 75 | 3 |  |  |  |        | HF2 37 |            |  |  |  | HRTV-5 79                |           | HRTV-8 82                |
| 76 | 6 |  |  |  | HF1 31 | HF2 36 | HGTV-1 229 |  |  |  | HHTV-2_81                |           | HRTV-8 83                |
| 77 | 3 |  |  |  |        |        |            |  |  |  | HRTV-5 82                | HRTV-7 69 | HRTV-8 84                |
| 78 | 4 |  |  |  | HF1 29 | HF2 34 |            |  |  |  | HRTV-5 83                |           | HRTV-8 85                |
| 79 | 5 |  |  |  | HF1 28 | HF2 33 |            |  |  |  | HRTV-5 84                | HRTV-7 71 | HRTV-8 86                |
| 80 | 5 |  |  |  | HF1 27 | HF2 32 |            |  |  |  | HRTV-5 85                | HRTV-7 72 | HRTV-8 87                |
| 81 | 2 |  |  |  |        |        |            |  |  |  | HRTV-5 86                |           | HRTV-8 89                |
| 82 | 4 |  |  |  | HF1 26 | HF2 31 |            |  |  |  | HRTV-5 87                |           | HRTV-8 90                |
| 83 | 4 |  |  |  | HF1 25 | HF2 30 |            |  |  |  | HRTV-5 88                |           | HRTV-8 91                |
| 84 | 5 |  |  |  | HF1 24 | HF2 29 |            |  |  |  | HRTV-5 89                | HRTV-7 79 | HRTV-8 92                |

|     |   |  |            |        |        |            |  |  |  |            |           |            |
|-----|---|--|------------|--------|--------|------------|--|--|--|------------|-----------|------------|
| 85  | 6 |  | HCTV-5 148 | HF1 23 | HF2 28 | HGTV-1 235 |  |  |  | HRTV-5 90  |           | HRTV-8 93  |
| 86  | 4 |  |            | HF1 22 | HF2 27 |            |  |  |  | HRTV-5 91  |           | HRTV-8 95  |
| 87  | 5 |  |            | HF1 21 | HF2 26 |            |  |  |  | HRTV-5 92  | HRTV-7 76 | HRTV-8 96  |
| 88  | 1 |  |            |        |        |            |  |  |  | HRTV-5 93  |           |            |
| 89  | 3 |  |            |        | HF2 23 |            |  |  |  | HRTV-5 94  |           | HRTV-8 100 |
| 90  | 4 |  |            | HF1 20 | HF2 22 |            |  |  |  | HRTV-5 95  |           | HRTV-8 101 |
| 91  | 4 |  |            | HF1 19 | HF2 21 |            |  |  |  | HRTV-5 96  |           | HRTV-8 102 |
| 92  | 1 |  |            |        |        |            |  |  |  | HRTV-5 97  |           |            |
| 93  | 1 |  |            |        |        |            |  |  |  | HRTV-5 98  |           |            |
| 94  | 4 |  |            | HF1 18 | HF2 20 |            |  |  |  | HRTV-5 99  |           | HRTV-8 105 |
| 95  | 4 |  |            | HF1 17 | HF2 19 |            |  |  |  | HRTV-5 100 |           | HRTV-8 106 |
| 96  | 4 |  |            | HF1 15 | HF2 17 |            |  |  |  | HRTV-5 101 |           | HRTV-8 108 |
| 97  | 2 |  |            |        |        |            |  |  |  | HRTV-5 102 |           | HRTV-8 109 |
| 98  | 2 |  |            |        |        |            |  |  |  | HRTV-5 103 |           | HRTV-8 110 |
| 99  | 3 |  |            |        |        |            |  |  |  | HRTV-5 104 | HRTV-7 82 | HRTV-8 111 |
| 100 | 2 |  |            |        |        |            |  |  |  | HRTV-5 105 |           | HRTV-8 112 |
| 101 | 4 |  |            | HF1 14 | HF2 16 |            |  |  |  | HRTV-5 106 |           | HRTV-8 113 |
| 102 | 4 |  |            | HF1 13 | HF2 15 |            |  |  |  | HRTV-5 107 |           | HRTV-8 115 |
| 103 | 4 |  |            | HF1 12 | HF2 14 |            |  |  |  | HRTV-5 108 |           | HRTV-8 116 |
| 104 | 4 |  |            | HF1 11 | HF2 13 |            |  |  |  | HRTV-5 109 |           | HRTV-8 117 |
| 105 | 5 |  |            | HF1 10 | HF2 12 |            |  |  |  | HRTV-5 110 | HRTV-7 95 | HRTV-8 118 |
| 106 | 4 |  |            | HF1 9  | HF2 11 |            |  |  |  | HRTV-5 111 |           | HRTV-8 119 |
| 107 | 4 |  |            | HF1 8  | HF2 10 |            |  |  |  | HRTV-5 112 |           | HRTV-8 120 |
| 108 | 4 |  |            | HF1 7  | HF2 9  |            |  |  |  | HRTV-5 113 |           | HRTV-8 121 |
| 109 | 3 |  |            |        | HF2 8  |            |  |  |  | HRTV-5 115 |           | HRTV-8 123 |
| 110 | 4 |  |            | HF1 6  | HF2 7  |            |  |  |  | HRTV-5 116 |           | HRTV-8 124 |
| 111 | 3 |  |            | HF1 5  | HF2 6  |            |  |  |  | HRTV-5 117 |           |            |
| 112 | 3 |  |            | HF1 4  | HF2 4  |            |  |  |  | HRTV-5 118 |           |            |
| 113 | 4 |  |            | HF1 3  | HF2 3  |            |  |  |  | HRTV-5 119 |           | HRTV-8 125 |
| 114 | 4 |  |            | HF1 2  | HF2 2  |            |  |  |  | HRTV-5 120 |           | HRTV-8 126 |



|     |   |  |                         |            |  |  |  |  |           |  |  |  |  |
|-----|---|--|-------------------------|------------|--|--|--|--|-----------|--|--|--|--|
| 145 | 1 |  | HCTV-2_29               |            |  |  |  |  |           |  |  |  |  |
| 146 | 1 |  | HCTV-2_30               |            |  |  |  |  |           |  |  |  |  |
| 147 | 1 |  | HCTV-2_31               |            |  |  |  |  |           |  |  |  |  |
| 148 | 2 |  | HCTV-2_32               |            |  |  |  |  | HHTV-2_38 |  |  |  |  |
| 149 | 2 |  | HCTV-2_33               |            |  |  |  |  | HHTV-2_39 |  |  |  |  |
| 150 | 1 |  | HCTV-2_34               |            |  |  |  |  |           |  |  |  |  |
| 151 | 2 |  | HCTV-2_35               |            |  |  |  |  | HHTV-2_42 |  |  |  |  |
| 152 | 3 |  | HCTV-2_36               | HCTV-5_125 |  |  |  |  | HHTV-2_43 |  |  |  |  |
| 153 | 3 |  | HCTV-2_37               | HCTV-5_126 |  |  |  |  | HHTV-2_44 |  |  |  |  |
| 154 | 2 |  | HCTV-2_38               |            |  |  |  |  | HHTV-2_45 |  |  |  |  |
| 155 | 3 |  | HCTV-2_39               | HCTV-5_127 |  |  |  |  | HHTV-2_46 |  |  |  |  |
| 156 | 3 |  | HCTV-2_40,<br>HCTV-2_41 |            |  |  |  |  | HHTV-2_47 |  |  |  |  |
| 157 | 3 |  | HCTV-2_42               | HCTV-5_130 |  |  |  |  | HHTV-2_49 |  |  |  |  |
| 158 | 3 |  | HCTV-2_43               | HCTV-5_131 |  |  |  |  | HHTV-2_50 |  |  |  |  |
| 159 | 3 |  | HCTV-2_44               | HCTV-5_132 |  |  |  |  | HHTV-2_51 |  |  |  |  |
| 160 | 3 |  | HCTV-2_45               | HCTV-5_133 |  |  |  |  | HHTV-2_52 |  |  |  |  |
| 161 | 3 |  | HCTV-2_46               | HCTV-5_134 |  |  |  |  | HHTV-2_53 |  |  |  |  |
| 162 | 1 |  | HCTV-2_47               |            |  |  |  |  |           |  |  |  |  |
| 163 | 1 |  | HCTV-2_48               |            |  |  |  |  |           |  |  |  |  |
| 164 | 1 |  | HCTV-2_49               |            |  |  |  |  |           |  |  |  |  |
| 165 | 1 |  | HCTV-2_50               |            |  |  |  |  |           |  |  |  |  |
| 166 | 1 |  | HCTV-2_51               |            |  |  |  |  |           |  |  |  |  |
| 167 | 1 |  | HCTV-2_52               |            |  |  |  |  |           |  |  |  |  |
| 168 | 1 |  | HCTV-2_53               |            |  |  |  |  |           |  |  |  |  |
| 169 | 1 |  | HCTV-2_54               |            |  |  |  |  |           |  |  |  |  |
| 170 | 1 |  | HCTV-2_55               |            |  |  |  |  |           |  |  |  |  |
| 171 | 1 |  | HCTV-2_56               |            |  |  |  |  |           |  |  |  |  |
| 172 | 1 |  | HCTV-2_57               |            |  |  |  |  |           |  |  |  |  |
| 173 | 3 |  | HCTV-2_58               | HCTV-5_135 |  |  |  |  | HHTV-2_62 |  |  |  |  |
| 174 | 3 |  | HCTV-2_59               | HCTV-5_136 |  |  |  |  | HHTV-2_63 |  |  |  |  |



















|     |   |            |  |  |  |         |        |          |  |  |  |  |  |  |
|-----|---|------------|--|--|--|---------|--------|----------|--|--|--|--|--|--|
| 411 | 1 | HCTV-1 130 |  |  |  |         |        |          |  |  |  |  |  |  |
| 412 | 1 | HCTV-1 131 |  |  |  |         |        |          |  |  |  |  |  |  |
| 413 | 1 | HCTV-1 136 |  |  |  |         |        |          |  |  |  |  |  |  |
| 414 | 1 | HCTV-1 138 |  |  |  |         |        |          |  |  |  |  |  |  |
| 415 | 1 | HCTV-1 139 |  |  |  |         |        |          |  |  |  |  |  |  |
| 416 | 1 | HCTV-1 140 |  |  |  |         |        |          |  |  |  |  |  |  |
| 417 | 1 | HCTV-1 142 |  |  |  |         |        |          |  |  |  |  |  |  |
| 418 | 1 | HCTV-1 143 |  |  |  |         |        |          |  |  |  |  |  |  |
| 419 | 1 | HCTV-1 144 |  |  |  |         |        |          |  |  |  |  |  |  |
| 420 | 1 | HCTV-1 147 |  |  |  |         |        |          |  |  |  |  |  |  |
| 421 | 1 | HCTV-1 148 |  |  |  |         |        |          |  |  |  |  |  |  |
| 422 | 1 | HCTV-1 149 |  |  |  |         |        |          |  |  |  |  |  |  |
| 423 | 1 | HCTV-1 150 |  |  |  |         |        |          |  |  |  |  |  |  |
| 424 | 1 | HCTV-1 152 |  |  |  |         |        |          |  |  |  |  |  |  |
| 425 | 1 | HCTV-1 155 |  |  |  |         |        |          |  |  |  |  |  |  |
| 426 | 1 | HCTV-1 156 |  |  |  |         |        |          |  |  |  |  |  |  |
| 427 | 1 | HCTV-1 157 |  |  |  |         |        |          |  |  |  |  |  |  |
| 428 | 1 | HCTV-1 158 |  |  |  |         |        |          |  |  |  |  |  |  |
| 429 | 1 | HCTV-1 159 |  |  |  |         |        |          |  |  |  |  |  |  |
| 430 | 1 | HCTV-1 160 |  |  |  |         |        |          |  |  |  |  |  |  |
| 431 | 1 |            |  |  |  |         | HF2_91 |          |  |  |  |  |  |  |
| 432 | 1 |            |  |  |  |         | HF2_84 |          |  |  |  |  |  |  |
| 433 | 2 |            |  |  |  | HF1_71  | HF2_80 |          |  |  |  |  |  |  |
| 434 | 1 |            |  |  |  |         | HF2_75 |          |  |  |  |  |  |  |
| 435 | 2 |            |  |  |  | HF1_56  | HF2_62 |          |  |  |  |  |  |  |
| 436 | 2 |            |  |  |  | HF1_48  | HF2_54 |          |  |  |  |  |  |  |
| 437 | 2 |            |  |  |  | HF1_16  | HF2_18 |          |  |  |  |  |  |  |
| 438 | 1 |            |  |  |  |         | HF2_5  |          |  |  |  |  |  |  |
| 439 | 1 |            |  |  |  | HF1_103 |        |          |  |  |  |  |  |  |
| 440 | 1 |            |  |  |  |         |        | HGTV-1_1 |  |  |  |  |  |  |

|     |   |  |  |  |  |                         |  |  |  |  |  |  |  |
|-----|---|--|--|--|--|-------------------------|--|--|--|--|--|--|--|
| 441 | 1 |  |  |  |  | HGTV-1 2                |  |  |  |  |  |  |  |
| 442 | 1 |  |  |  |  | HGTV-1 3                |  |  |  |  |  |  |  |
| 443 | 1 |  |  |  |  | HGTV-1 4                |  |  |  |  |  |  |  |
| 444 | 1 |  |  |  |  | HGTV-1 5                |  |  |  |  |  |  |  |
| 445 | 1 |  |  |  |  | HGTV-1 6                |  |  |  |  |  |  |  |
| 446 | 1 |  |  |  |  | HGTV-1 7                |  |  |  |  |  |  |  |
| 447 | 1 |  |  |  |  | HGTV-1 8                |  |  |  |  |  |  |  |
| 448 | 1 |  |  |  |  | HGTV-1 9                |  |  |  |  |  |  |  |
| 449 | 1 |  |  |  |  | HGTV-1 10               |  |  |  |  |  |  |  |
| 450 | 1 |  |  |  |  | HGTV-1 11               |  |  |  |  |  |  |  |
| 451 | 1 |  |  |  |  | HGTV-1 12               |  |  |  |  |  |  |  |
| 452 | 1 |  |  |  |  | HGTV-1 13               |  |  |  |  |  |  |  |
| 453 | 1 |  |  |  |  | HGTV-1 14               |  |  |  |  |  |  |  |
| 454 | 1 |  |  |  |  | HGTV-1 15               |  |  |  |  |  |  |  |
| 455 | 1 |  |  |  |  | HGTV-1 16               |  |  |  |  |  |  |  |
| 456 | 1 |  |  |  |  | HGTV-1 17               |  |  |  |  |  |  |  |
| 457 | 1 |  |  |  |  | HGTV-1 18               |  |  |  |  |  |  |  |
| 458 | 1 |  |  |  |  | HGTV-1 19               |  |  |  |  |  |  |  |
| 459 | 1 |  |  |  |  | HGTV-1 20               |  |  |  |  |  |  |  |
| 460 | 1 |  |  |  |  | HGTV-1 21               |  |  |  |  |  |  |  |
| 461 | 1 |  |  |  |  | HGTV-1 22               |  |  |  |  |  |  |  |
| 462 | 1 |  |  |  |  | HGTV-1 23               |  |  |  |  |  |  |  |
| 463 | 1 |  |  |  |  | HGTV-1 24               |  |  |  |  |  |  |  |
| 464 | 1 |  |  |  |  | HGTV-1 25               |  |  |  |  |  |  |  |
| 465 | 1 |  |  |  |  | HGTV-1 26               |  |  |  |  |  |  |  |
| 466 | 1 |  |  |  |  | HGTV-1 27               |  |  |  |  |  |  |  |
| 467 | 1 |  |  |  |  | HGTV-1 28               |  |  |  |  |  |  |  |
| 468 | 2 |  |  |  |  | HGTV-1_29,<br>HGTV-1 31 |  |  |  |  |  |  |  |
| 469 | 1 |  |  |  |  | HGTV-1 30               |  |  |  |  |  |  |  |
| 470 | 1 |  |  |  |  | HGTV-1 32               |  |  |  |  |  |  |  |

|     |   |  |  |  |  |                          |  |  |  |  |  |  |  |
|-----|---|--|--|--|--|--------------------------|--|--|--|--|--|--|--|
| 471 | 1 |  |  |  |  | HGTV-1 33                |  |  |  |  |  |  |  |
| 472 | 1 |  |  |  |  | HGTV-1 34                |  |  |  |  |  |  |  |
| 473 | 1 |  |  |  |  | HGTV-1 35                |  |  |  |  |  |  |  |
| 474 | 1 |  |  |  |  | HGTV-1 36                |  |  |  |  |  |  |  |
| 475 | 1 |  |  |  |  | HGTV-1 37                |  |  |  |  |  |  |  |
| 476 | 1 |  |  |  |  | HGTV-1 38                |  |  |  |  |  |  |  |
| 477 | 1 |  |  |  |  | HGTV-1 39                |  |  |  |  |  |  |  |
| 478 | 1 |  |  |  |  | HGTV-1 40                |  |  |  |  |  |  |  |
| 479 | 1 |  |  |  |  | HGTV-1 41                |  |  |  |  |  |  |  |
| 480 | 1 |  |  |  |  | HGTV-1 42                |  |  |  |  |  |  |  |
| 481 | 1 |  |  |  |  | HGTV-1 43                |  |  |  |  |  |  |  |
| 482 | 1 |  |  |  |  | HGTV-1 44                |  |  |  |  |  |  |  |
| 483 | 1 |  |  |  |  | HGTV-1 45                |  |  |  |  |  |  |  |
| 484 | 1 |  |  |  |  | HGTV-1 46                |  |  |  |  |  |  |  |
| 485 | 1 |  |  |  |  | HGTV-1 47                |  |  |  |  |  |  |  |
| 486 | 1 |  |  |  |  | HGTV-1 48                |  |  |  |  |  |  |  |
| 487 | 2 |  |  |  |  | HGTV-1_205,<br>HGTV-1 50 |  |  |  |  |  |  |  |
| 488 | 1 |  |  |  |  | HGTV-1 51                |  |  |  |  |  |  |  |
| 489 | 1 |  |  |  |  | HGTV-1 52                |  |  |  |  |  |  |  |
| 490 | 1 |  |  |  |  | HGTV-1 53                |  |  |  |  |  |  |  |
| 491 | 1 |  |  |  |  | HGTV-1 54                |  |  |  |  |  |  |  |
| 492 | 1 |  |  |  |  | HGTV-1 56                |  |  |  |  |  |  |  |
| 493 | 1 |  |  |  |  | HGTV-1 60                |  |  |  |  |  |  |  |
| 494 | 1 |  |  |  |  | HGTV-1 61                |  |  |  |  |  |  |  |
| 495 | 1 |  |  |  |  | HGTV-1 62                |  |  |  |  |  |  |  |
| 496 | 1 |  |  |  |  | HGTV-1 63                |  |  |  |  |  |  |  |
| 497 | 1 |  |  |  |  | HGTV-1 64                |  |  |  |  |  |  |  |
| 498 | 1 |  |  |  |  | HGTV-1 65                |  |  |  |  |  |  |  |
| 499 | 1 |  |  |  |  | HGTV-1 66                |  |  |  |  |  |  |  |



|     |   |  |  |  |  |                          |  |  |  |  |  |  |  |
|-----|---|--|--|--|--|--------------------------|--|--|--|--|--|--|--|
| 500 | 1 |  |  |  |  | HGTV-1 67                |  |  |  |  |  |  |  |
| 501 | 1 |  |  |  |  | HGTV-1 72                |  |  |  |  |  |  |  |
| 502 | 1 |  |  |  |  | HGTV-1 74                |  |  |  |  |  |  |  |
| 503 | 1 |  |  |  |  | HGTV-1 76                |  |  |  |  |  |  |  |
| 504 | 1 |  |  |  |  | HGTV-1 78                |  |  |  |  |  |  |  |
| 505 | 2 |  |  |  |  | HGTV-1_102,<br>HGTV-1 89 |  |  |  |  |  |  |  |
| 506 | 1 |  |  |  |  | HGTV-1 97                |  |  |  |  |  |  |  |
| 507 | 1 |  |  |  |  | HGTV-1 98                |  |  |  |  |  |  |  |
| 508 | 1 |  |  |  |  | HGTV-1 99                |  |  |  |  |  |  |  |
| 509 | 1 |  |  |  |  | HGTV-1 104               |  |  |  |  |  |  |  |
| 510 | 1 |  |  |  |  | HGTV-1 109               |  |  |  |  |  |  |  |
| 511 | 1 |  |  |  |  | HGTV-1 110               |  |  |  |  |  |  |  |
| 512 | 1 |  |  |  |  | HGTV-1 111               |  |  |  |  |  |  |  |
| 513 | 1 |  |  |  |  | HGTV-1 112               |  |  |  |  |  |  |  |
| 514 | 1 |  |  |  |  | HGTV-1 113               |  |  |  |  |  |  |  |
| 515 | 1 |  |  |  |  | HGTV-1 114               |  |  |  |  |  |  |  |
| 516 | 1 |  |  |  |  | HGTV-1 115               |  |  |  |  |  |  |  |
| 517 | 1 |  |  |  |  | HGTV-1 116               |  |  |  |  |  |  |  |
| 518 | 1 |  |  |  |  | HGTV-1 118               |  |  |  |  |  |  |  |
| 519 | 1 |  |  |  |  | HGTV-1 119               |  |  |  |  |  |  |  |
| 520 | 1 |  |  |  |  | HGTV-1 120               |  |  |  |  |  |  |  |
| 521 | 1 |  |  |  |  | HGTV-1 121               |  |  |  |  |  |  |  |
| 522 | 1 |  |  |  |  | HGTV-1 122               |  |  |  |  |  |  |  |
| 523 | 1 |  |  |  |  | HGTV-1 123               |  |  |  |  |  |  |  |
| 524 | 1 |  |  |  |  | HGTV-1 124               |  |  |  |  |  |  |  |
| 525 | 1 |  |  |  |  | HGTV-1 125               |  |  |  |  |  |  |  |
| 526 | 1 |  |  |  |  | HGTV-1 126               |  |  |  |  |  |  |  |
| 527 | 1 |  |  |  |  | HGTV-1 127               |  |  |  |  |  |  |  |
| 528 | 1 |  |  |  |  | HGTV-1 128               |  |  |  |  |  |  |  |

|     |   |  |  |  |  |            |  |  |  |  |  |  |  |
|-----|---|--|--|--|--|------------|--|--|--|--|--|--|--|
| 529 | 1 |  |  |  |  | HGTV-1 129 |  |  |  |  |  |  |  |
| 530 | 1 |  |  |  |  | HGTV-1 130 |  |  |  |  |  |  |  |
| 531 | 1 |  |  |  |  | HGTV-1 131 |  |  |  |  |  |  |  |
| 532 | 1 |  |  |  |  | HGTV-1 132 |  |  |  |  |  |  |  |
| 533 | 1 |  |  |  |  | HGTV-1 133 |  |  |  |  |  |  |  |
| 534 | 1 |  |  |  |  | HGTV-1 134 |  |  |  |  |  |  |  |
| 535 | 1 |  |  |  |  | HGTV-1 135 |  |  |  |  |  |  |  |
| 536 | 1 |  |  |  |  | HGTV-1 137 |  |  |  |  |  |  |  |
| 537 | 1 |  |  |  |  | HGTV-1 138 |  |  |  |  |  |  |  |
| 538 | 1 |  |  |  |  | HGTV-1 139 |  |  |  |  |  |  |  |
| 539 | 1 |  |  |  |  | HGTV-1 141 |  |  |  |  |  |  |  |
| 540 | 1 |  |  |  |  | HGTV-1 142 |  |  |  |  |  |  |  |
| 541 | 1 |  |  |  |  | HGTV-1 143 |  |  |  |  |  |  |  |
| 542 | 1 |  |  |  |  | HGTV-1 144 |  |  |  |  |  |  |  |
| 543 | 1 |  |  |  |  | HGTV-1 145 |  |  |  |  |  |  |  |
| 544 | 1 |  |  |  |  | HGTV-1 146 |  |  |  |  |  |  |  |
| 545 | 1 |  |  |  |  | HGTV-1 147 |  |  |  |  |  |  |  |
| 546 | 1 |  |  |  |  | HGTV-1 148 |  |  |  |  |  |  |  |
| 547 | 1 |  |  |  |  | HGTV-1 149 |  |  |  |  |  |  |  |
| 548 | 1 |  |  |  |  | HGTV-1 150 |  |  |  |  |  |  |  |
| 549 | 1 |  |  |  |  | HGTV-1 151 |  |  |  |  |  |  |  |
| 550 | 1 |  |  |  |  | HGTV-1 152 |  |  |  |  |  |  |  |
| 551 | 1 |  |  |  |  | HGTV-1 153 |  |  |  |  |  |  |  |
| 552 | 1 |  |  |  |  | HGTV-1 154 |  |  |  |  |  |  |  |
| 553 | 1 |  |  |  |  | HGTV-1 155 |  |  |  |  |  |  |  |
| 554 | 1 |  |  |  |  | HGTV-1 156 |  |  |  |  |  |  |  |
| 555 | 1 |  |  |  |  | HGTV-1 157 |  |  |  |  |  |  |  |
| 556 | 1 |  |  |  |  | HGTV-1 158 |  |  |  |  |  |  |  |
| 557 | 1 |  |  |  |  | HGTV-1 159 |  |  |  |  |  |  |  |
| 558 | 1 |  |  |  |  | HGTV-1 160 |  |  |  |  |  |  |  |

|     |   |  |  |  |  |            |  |  |  |  |  |  |  |
|-----|---|--|--|--|--|------------|--|--|--|--|--|--|--|
| 559 | 1 |  |  |  |  | HGTV-1 161 |  |  |  |  |  |  |  |
| 560 | 1 |  |  |  |  | HGTV-1 162 |  |  |  |  |  |  |  |
| 561 | 1 |  |  |  |  | HGTV-1 163 |  |  |  |  |  |  |  |
| 562 | 1 |  |  |  |  | HGTV-1 164 |  |  |  |  |  |  |  |
| 563 | 1 |  |  |  |  | HGTV-1 165 |  |  |  |  |  |  |  |
| 564 | 1 |  |  |  |  | HGTV-1 166 |  |  |  |  |  |  |  |
| 565 | 1 |  |  |  |  | HGTV-1 167 |  |  |  |  |  |  |  |
| 566 | 1 |  |  |  |  | HGTV-1 168 |  |  |  |  |  |  |  |
| 567 | 1 |  |  |  |  | HGTV-1 169 |  |  |  |  |  |  |  |
| 568 | 1 |  |  |  |  | HGTV-1 170 |  |  |  |  |  |  |  |
| 569 | 1 |  |  |  |  | HGTV-1 171 |  |  |  |  |  |  |  |
| 570 | 1 |  |  |  |  | HGTV-1 172 |  |  |  |  |  |  |  |
| 571 | 1 |  |  |  |  | HGTV-1 173 |  |  |  |  |  |  |  |
| 572 | 1 |  |  |  |  | HGTV-1 174 |  |  |  |  |  |  |  |
| 573 | 1 |  |  |  |  | HGTV-1 175 |  |  |  |  |  |  |  |
| 574 | 1 |  |  |  |  | HGTV-1 176 |  |  |  |  |  |  |  |
| 575 | 1 |  |  |  |  | HGTV-1 177 |  |  |  |  |  |  |  |
| 576 | 1 |  |  |  |  | HGTV-1 178 |  |  |  |  |  |  |  |
| 577 | 1 |  |  |  |  | HGTV-1 179 |  |  |  |  |  |  |  |
| 578 | 1 |  |  |  |  | HGTV-1 180 |  |  |  |  |  |  |  |
| 579 | 1 |  |  |  |  | HGTV-1 181 |  |  |  |  |  |  |  |
| 580 | 1 |  |  |  |  | HGTV-1 182 |  |  |  |  |  |  |  |
| 581 | 1 |  |  |  |  | HGTV-1 183 |  |  |  |  |  |  |  |
| 582 | 1 |  |  |  |  | HGTV-1 184 |  |  |  |  |  |  |  |
| 583 | 1 |  |  |  |  | HGTV-1 185 |  |  |  |  |  |  |  |
| 584 | 1 |  |  |  |  | HGTV-1 186 |  |  |  |  |  |  |  |
| 585 | 1 |  |  |  |  | HGTV-1 187 |  |  |  |  |  |  |  |
| 586 | 1 |  |  |  |  | HGTV-1 188 |  |  |  |  |  |  |  |
| 587 | 1 |  |  |  |  | HGTV-1 189 |  |  |  |  |  |  |  |
| 588 | 1 |  |  |  |  | HGTV-1 190 |  |  |  |  |  |  |  |

|     |   |  |  |  |  |                           |  |  |  |  |  |  |  |
|-----|---|--|--|--|--|---------------------------|--|--|--|--|--|--|--|
| 589 | 1 |  |  |  |  | HGTV-1 191                |  |  |  |  |  |  |  |
| 590 | 1 |  |  |  |  | HGTV-1 192                |  |  |  |  |  |  |  |
| 591 | 1 |  |  |  |  | HGTV-1 193                |  |  |  |  |  |  |  |
| 592 | 1 |  |  |  |  | HGTV-1 194                |  |  |  |  |  |  |  |
| 593 | 1 |  |  |  |  | HGTV-1 195                |  |  |  |  |  |  |  |
| 594 | 1 |  |  |  |  | HGTV-1 196                |  |  |  |  |  |  |  |
| 595 | 1 |  |  |  |  | HGTV-1 197                |  |  |  |  |  |  |  |
| 596 | 1 |  |  |  |  | HGTV-1 198                |  |  |  |  |  |  |  |
| 597 | 1 |  |  |  |  | HGTV-1 199                |  |  |  |  |  |  |  |
| 598 | 1 |  |  |  |  | HGTV-1 200                |  |  |  |  |  |  |  |
| 599 | 1 |  |  |  |  | HGTV-1 201                |  |  |  |  |  |  |  |
| 600 | 1 |  |  |  |  | HGTV-1 202                |  |  |  |  |  |  |  |
| 601 | 1 |  |  |  |  | HGTV-1 203                |  |  |  |  |  |  |  |
| 602 | 1 |  |  |  |  | HGTV-1 206                |  |  |  |  |  |  |  |
| 603 | 1 |  |  |  |  | HGTV-1 207                |  |  |  |  |  |  |  |
| 604 | 1 |  |  |  |  | HGTV-1 208                |  |  |  |  |  |  |  |
| 605 | 2 |  |  |  |  | HGTV-1 209,<br>HGTV-1 210 |  |  |  |  |  |  |  |
| 606 | 1 |  |  |  |  | HGTV-1 211                |  |  |  |  |  |  |  |
| 607 | 1 |  |  |  |  | HGTV-1 212                |  |  |  |  |  |  |  |
| 608 | 1 |  |  |  |  | HGTV-1 213                |  |  |  |  |  |  |  |
| 609 | 1 |  |  |  |  | HGTV-1 214                |  |  |  |  |  |  |  |
| 610 | 1 |  |  |  |  | HGTV-1 215                |  |  |  |  |  |  |  |
| 611 | 1 |  |  |  |  | HGTV-1 216                |  |  |  |  |  |  |  |
| 612 | 1 |  |  |  |  | HGTV-1 217                |  |  |  |  |  |  |  |
| 613 | 1 |  |  |  |  | HGTV-1 218                |  |  |  |  |  |  |  |
| 614 | 1 |  |  |  |  | HGTV-1 219                |  |  |  |  |  |  |  |
| 615 | 1 |  |  |  |  | HGTV-1 220                |  |  |  |  |  |  |  |
| 616 | 1 |  |  |  |  | HGTV-1 221                |  |  |  |  |  |  |  |
| 617 | 1 |  |  |  |  | HGTV-1 222                |  |  |  |  |  |  |  |

|     |   |  |  |  |  |            |  |  |  |  |  |  |  |
|-----|---|--|--|--|--|------------|--|--|--|--|--|--|--|
| 618 | 1 |  |  |  |  | HGTV-1 223 |  |  |  |  |  |  |  |
| 619 | 1 |  |  |  |  | HGTV-1 224 |  |  |  |  |  |  |  |
| 620 | 1 |  |  |  |  | HGTV-1 225 |  |  |  |  |  |  |  |
| 621 | 1 |  |  |  |  | HGTV-1 226 |  |  |  |  |  |  |  |
| 622 | 1 |  |  |  |  | HGTV-1 227 |  |  |  |  |  |  |  |
| 623 | 1 |  |  |  |  | HGTV-1 228 |  |  |  |  |  |  |  |
| 624 | 1 |  |  |  |  | HGTV-1 230 |  |  |  |  |  |  |  |
| 625 | 1 |  |  |  |  | HGTV-1 231 |  |  |  |  |  |  |  |
| 626 | 1 |  |  |  |  | HGTV-1 232 |  |  |  |  |  |  |  |
| 627 | 1 |  |  |  |  | HGTV-1 233 |  |  |  |  |  |  |  |
| 628 | 1 |  |  |  |  | HGTV-1 234 |  |  |  |  |  |  |  |
| 629 | 1 |  |  |  |  | HGTV-1 236 |  |  |  |  |  |  |  |
| 630 | 1 |  |  |  |  | HGTV-1 237 |  |  |  |  |  |  |  |
| 631 | 1 |  |  |  |  | HGTV-1 238 |  |  |  |  |  |  |  |
| 632 | 1 |  |  |  |  | HGTV-1 239 |  |  |  |  |  |  |  |
| 633 | 1 |  |  |  |  | HGTV-1 240 |  |  |  |  |  |  |  |
| 634 | 1 |  |  |  |  | HGTV-1 241 |  |  |  |  |  |  |  |
| 635 | 1 |  |  |  |  | HGTV-1 242 |  |  |  |  |  |  |  |
| 636 | 1 |  |  |  |  | HGTV-1 243 |  |  |  |  |  |  |  |
| 637 | 1 |  |  |  |  | HGTV-1 244 |  |  |  |  |  |  |  |
| 638 | 1 |  |  |  |  | HGTV-1 246 |  |  |  |  |  |  |  |
| 639 | 1 |  |  |  |  | HGTV-1 247 |  |  |  |  |  |  |  |
| 640 | 1 |  |  |  |  | HGTV-1 249 |  |  |  |  |  |  |  |
| 641 | 1 |  |  |  |  | HGTV-1 250 |  |  |  |  |  |  |  |
| 642 | 1 |  |  |  |  | HGTV-1 251 |  |  |  |  |  |  |  |
| 643 | 1 |  |  |  |  | HGTV-1 252 |  |  |  |  |  |  |  |
| 644 | 1 |  |  |  |  | HGTV-1 253 |  |  |  |  |  |  |  |
| 645 | 1 |  |  |  |  | HGTV-1 254 |  |  |  |  |  |  |  |
| 646 | 1 |  |  |  |  | HGTV-1 255 |  |  |  |  |  |  |  |
| 647 | 1 |  |  |  |  | HGTV-1 257 |  |  |  |  |  |  |  |

|     |   |  |  |  |  |            |  |  |  |  |  |  |  |
|-----|---|--|--|--|--|------------|--|--|--|--|--|--|--|
| 648 | 1 |  |  |  |  | HGTV-1 258 |  |  |  |  |  |  |  |
| 649 | 1 |  |  |  |  | HGTV-1 259 |  |  |  |  |  |  |  |
| 650 | 1 |  |  |  |  | HGTV-1 260 |  |  |  |  |  |  |  |
| 651 | 1 |  |  |  |  | HGTV-1 261 |  |  |  |  |  |  |  |
| 652 | 1 |  |  |  |  | HGTV-1 262 |  |  |  |  |  |  |  |
| 653 | 1 |  |  |  |  | HGTV-1 263 |  |  |  |  |  |  |  |
| 654 | 1 |  |  |  |  | HGTV-1 264 |  |  |  |  |  |  |  |
| 655 | 1 |  |  |  |  | HGTV-1 265 |  |  |  |  |  |  |  |
| 656 | 1 |  |  |  |  | HGTV-1 266 |  |  |  |  |  |  |  |
| 657 | 1 |  |  |  |  | HGTV-1 267 |  |  |  |  |  |  |  |
| 658 | 1 |  |  |  |  | HGTV-1 268 |  |  |  |  |  |  |  |
| 659 | 1 |  |  |  |  | HGTV-1 269 |  |  |  |  |  |  |  |
| 660 | 1 |  |  |  |  | HGTV-1 270 |  |  |  |  |  |  |  |
| 661 | 1 |  |  |  |  | HGTV-1 271 |  |  |  |  |  |  |  |
| 662 | 1 |  |  |  |  | HGTV-1 272 |  |  |  |  |  |  |  |
| 663 | 1 |  |  |  |  | HGTV-1 273 |  |  |  |  |  |  |  |
| 664 | 1 |  |  |  |  | HGTV-1 274 |  |  |  |  |  |  |  |
| 665 | 1 |  |  |  |  | HGTV-1 275 |  |  |  |  |  |  |  |
| 666 | 1 |  |  |  |  | HGTV-1 276 |  |  |  |  |  |  |  |
| 667 | 1 |  |  |  |  | HGTV-1 277 |  |  |  |  |  |  |  |
| 668 | 1 |  |  |  |  | HGTV-1 278 |  |  |  |  |  |  |  |
| 669 | 1 |  |  |  |  | HGTV-1 279 |  |  |  |  |  |  |  |
| 670 | 1 |  |  |  |  | HGTV-1 280 |  |  |  |  |  |  |  |
| 671 | 1 |  |  |  |  | HGTV-1 281 |  |  |  |  |  |  |  |
| 672 | 1 |  |  |  |  | HGTV-1 282 |  |  |  |  |  |  |  |
| 673 | 1 |  |  |  |  | HGTV-1 283 |  |  |  |  |  |  |  |
| 674 | 1 |  |  |  |  | HGTV-1 284 |  |  |  |  |  |  |  |
| 675 | 1 |  |  |  |  | HGTV-1 285 |  |  |  |  |  |  |  |
| 676 | 1 |  |  |  |  | HGTV-1 286 |  |  |  |  |  |  |  |
| 677 | 1 |  |  |  |  | HGTV-1 287 |  |  |  |  |  |  |  |

|     |   |  |  |  |  |            |  |  |  |          |  |  |  |
|-----|---|--|--|--|--|------------|--|--|--|----------|--|--|--|
| 678 | 1 |  |  |  |  | HGTV-1 288 |  |  |  |          |  |  |  |
| 679 | 1 |  |  |  |  | HGTV-1 289 |  |  |  |          |  |  |  |
| 680 | 1 |  |  |  |  | HGTV-1 290 |  |  |  |          |  |  |  |
| 681 | 1 |  |  |  |  | HGTV-1 291 |  |  |  |          |  |  |  |
| 682 | 1 |  |  |  |  | HGTV-1 292 |  |  |  |          |  |  |  |
| 683 | 1 |  |  |  |  | HGTV-1 293 |  |  |  |          |  |  |  |
| 684 | 1 |  |  |  |  | HGTV-1 294 |  |  |  |          |  |  |  |
| 685 | 1 |  |  |  |  | HGTV-1 295 |  |  |  |          |  |  |  |
| 686 | 1 |  |  |  |  | HGTV-1 296 |  |  |  |          |  |  |  |
| 687 | 1 |  |  |  |  | HGTV-1 297 |  |  |  |          |  |  |  |
| 688 | 1 |  |  |  |  | HGTV-1 298 |  |  |  |          |  |  |  |
| 689 | 1 |  |  |  |  | HGTV-1 299 |  |  |  |          |  |  |  |
| 690 | 1 |  |  |  |  | HGTV-1 300 |  |  |  |          |  |  |  |
| 691 | 1 |  |  |  |  | HGTV-1 301 |  |  |  |          |  |  |  |
| 692 | 1 |  |  |  |  | HGTV-1 302 |  |  |  |          |  |  |  |
| 693 | 1 |  |  |  |  | HGTV-1 303 |  |  |  |          |  |  |  |
| 694 | 1 |  |  |  |  | HGTV-1 304 |  |  |  |          |  |  |  |
| 695 | 1 |  |  |  |  | HGTV-1 305 |  |  |  |          |  |  |  |
| 696 | 1 |  |  |  |  | HGTV-1 306 |  |  |  |          |  |  |  |
| 697 | 1 |  |  |  |  | HGTV-1 307 |  |  |  |          |  |  |  |
| 698 | 1 |  |  |  |  | HGTV-1 308 |  |  |  |          |  |  |  |
| 699 | 1 |  |  |  |  | HGTV-1 309 |  |  |  |          |  |  |  |
| 700 | 1 |  |  |  |  | HGTV-1 310 |  |  |  |          |  |  |  |
| 701 | 1 |  |  |  |  | HGTV-1 311 |  |  |  |          |  |  |  |
| 702 | 1 |  |  |  |  | HGTV-1 312 |  |  |  |          |  |  |  |
| 703 | 1 |  |  |  |  | HGTV-1 313 |  |  |  |          |  |  |  |
| 704 | 1 |  |  |  |  | HGTV-1 314 |  |  |  |          |  |  |  |
| 705 | 1 |  |  |  |  |            |  |  |  | HHTV-2 1 |  |  |  |
| 706 | 1 |  |  |  |  |            |  |  |  | HHTV-2 2 |  |  |  |
| 707 | 1 |  |  |  |  |            |  |  |  | HHTV-2 4 |  |  |  |

|     |   |  |  |  |  |  |  |  |           |           |  |  |  |
|-----|---|--|--|--|--|--|--|--|-----------|-----------|--|--|--|
| 708 | 1 |  |  |  |  |  |  |  | HHTV-2 5  |           |  |  |  |
| 709 | 1 |  |  |  |  |  |  |  | HHTV-2 6  |           |  |  |  |
| 710 | 1 |  |  |  |  |  |  |  | HHTV-2 7  |           |  |  |  |
| 711 | 1 |  |  |  |  |  |  |  | HHTV-2 8  |           |  |  |  |
| 712 | 1 |  |  |  |  |  |  |  | HHTV-2 9  |           |  |  |  |
| 713 | 1 |  |  |  |  |  |  |  | HHTV-2 11 |           |  |  |  |
| 714 | 1 |  |  |  |  |  |  |  | HHTV-2 12 |           |  |  |  |
| 715 | 1 |  |  |  |  |  |  |  | HHTV-2 13 |           |  |  |  |
| 716 | 1 |  |  |  |  |  |  |  | HHTV-2 14 |           |  |  |  |
| 717 | 1 |  |  |  |  |  |  |  | HHTV-2 15 |           |  |  |  |
| 718 | 1 |  |  |  |  |  |  |  | HHTV-2 16 |           |  |  |  |
| 719 | 1 |  |  |  |  |  |  |  | HHTV-2 17 |           |  |  |  |
| 720 | 1 |  |  |  |  |  |  |  | HHTV-2 19 |           |  |  |  |
| 721 | 1 |  |  |  |  |  |  |  | HHTV-2 20 |           |  |  |  |
| 722 | 1 |  |  |  |  |  |  |  | HHTV-2 21 |           |  |  |  |
| 723 | 1 |  |  |  |  |  |  |  | HHTV-2 22 |           |  |  |  |
| 724 | 1 |  |  |  |  |  |  |  | HHTV-2 24 |           |  |  |  |
| 725 | 1 |  |  |  |  |  |  |  | HHTV-2 25 |           |  |  |  |
| 726 | 1 |  |  |  |  |  |  |  | HHTV-2 26 |           |  |  |  |
| 727 | 2 |  |  |  |  |  |  |  | HHTV-2 28 | HRTV-4 18 |  |  |  |
| 728 | 1 |  |  |  |  |  |  |  | HHTV-2 29 |           |  |  |  |
| 729 | 1 |  |  |  |  |  |  |  | HHTV-2 30 |           |  |  |  |
| 730 | 1 |  |  |  |  |  |  |  | HHTV-2 33 |           |  |  |  |
| 731 | 1 |  |  |  |  |  |  |  | HHTV-2 40 |           |  |  |  |
| 732 | 1 |  |  |  |  |  |  |  | HHTV-2 41 |           |  |  |  |
| 733 | 1 |  |  |  |  |  |  |  | HHTV-2 48 |           |  |  |  |
| 734 | 1 |  |  |  |  |  |  |  | HHTV-2 54 |           |  |  |  |
| 735 | 1 |  |  |  |  |  |  |  | HHTV-2 55 |           |  |  |  |
| 736 | 1 |  |  |  |  |  |  |  | HHTV-2 56 |           |  |  |  |
| 737 | 1 |  |  |  |  |  |  |  | HHTV-2 57 |           |  |  |  |



|     |   |  |  |  |  |  |  |  |           |          |  |  |  |
|-----|---|--|--|--|--|--|--|--|-----------|----------|--|--|--|
| 738 | 1 |  |  |  |  |  |  |  | HHTV-2 58 |          |  |  |  |
| 739 | 1 |  |  |  |  |  |  |  | HHTV-2 59 |          |  |  |  |
| 740 | 1 |  |  |  |  |  |  |  | HHTV-2 60 |          |  |  |  |
| 741 | 1 |  |  |  |  |  |  |  | HHTV-2 61 |          |  |  |  |
| 742 | 1 |  |  |  |  |  |  |  | HHTV-2 64 |          |  |  |  |
| 743 | 1 |  |  |  |  |  |  |  | HHTV-2 65 |          |  |  |  |
| 744 | 1 |  |  |  |  |  |  |  | HHTV-2 67 |          |  |  |  |
| 745 | 1 |  |  |  |  |  |  |  | HHTV-2 68 |          |  |  |  |
| 746 | 1 |  |  |  |  |  |  |  | HHTV-2 69 |          |  |  |  |
| 747 | 1 |  |  |  |  |  |  |  | HHTV-2 70 |          |  |  |  |
| 748 | 1 |  |  |  |  |  |  |  | HHTV-2 71 |          |  |  |  |
| 749 | 1 |  |  |  |  |  |  |  | HHTV-2 72 |          |  |  |  |
| 750 | 1 |  |  |  |  |  |  |  | HHTV-2 73 |          |  |  |  |
| 751 | 1 |  |  |  |  |  |  |  | HHTV-2 74 |          |  |  |  |
| 752 | 1 |  |  |  |  |  |  |  | HHTV-2 75 |          |  |  |  |
| 753 | 1 |  |  |  |  |  |  |  | HHTV-2 76 |          |  |  |  |
| 754 | 1 |  |  |  |  |  |  |  | HHTV-2 77 |          |  |  |  |
| 755 | 1 |  |  |  |  |  |  |  | HHTV-2 78 |          |  |  |  |
| 756 | 1 |  |  |  |  |  |  |  | HHTV-2 79 |          |  |  |  |
| 757 | 1 |  |  |  |  |  |  |  | HHTV-2 82 |          |  |  |  |
| 758 | 1 |  |  |  |  |  |  |  | HHTV-2 84 |          |  |  |  |
| 759 | 1 |  |  |  |  |  |  |  | HHTV-2 85 |          |  |  |  |
| 760 | 1 |  |  |  |  |  |  |  | HHTV-2 86 |          |  |  |  |
| 761 | 1 |  |  |  |  |  |  |  | HHTV-2 87 |          |  |  |  |
| 762 | 1 |  |  |  |  |  |  |  |           | HRTV-4 1 |  |  |  |
| 763 | 1 |  |  |  |  |  |  |  |           | HRTV-4 2 |  |  |  |
| 764 | 1 |  |  |  |  |  |  |  |           | HRTV-4 3 |  |  |  |
| 765 | 1 |  |  |  |  |  |  |  |           | HRTV-4 4 |  |  |  |
| 766 | 1 |  |  |  |  |  |  |  |           | HRTV-4 5 |  |  |  |
| 767 | 1 |  |  |  |  |  |  |  |           | HRTV-4 6 |  |  |  |

|     |   |  |  |  |  |  |  |  |  |           |  |  |  |
|-----|---|--|--|--|--|--|--|--|--|-----------|--|--|--|
| 768 | 1 |  |  |  |  |  |  |  |  | HRTV-4 7  |  |  |  |
| 769 | 1 |  |  |  |  |  |  |  |  | HRTV-4 8  |  |  |  |
| 770 | 1 |  |  |  |  |  |  |  |  | HRTV-4 9  |  |  |  |
| 771 | 1 |  |  |  |  |  |  |  |  | HRTV-4 10 |  |  |  |
| 772 | 1 |  |  |  |  |  |  |  |  | HRTV-4 11 |  |  |  |
| 773 | 1 |  |  |  |  |  |  |  |  | HRTV-4 12 |  |  |  |
| 774 | 1 |  |  |  |  |  |  |  |  | HRTV-4 13 |  |  |  |
| 775 | 1 |  |  |  |  |  |  |  |  | HRTV-4 14 |  |  |  |
| 776 | 1 |  |  |  |  |  |  |  |  | HRTV-4 15 |  |  |  |
| 777 | 1 |  |  |  |  |  |  |  |  | HRTV-4 16 |  |  |  |
| 778 | 1 |  |  |  |  |  |  |  |  | HRTV-4 17 |  |  |  |
| 779 | 1 |  |  |  |  |  |  |  |  | HRTV-4 19 |  |  |  |
| 780 | 1 |  |  |  |  |  |  |  |  | HRTV-4 20 |  |  |  |
| 781 | 1 |  |  |  |  |  |  |  |  | HRTV-4 21 |  |  |  |
| 782 | 1 |  |  |  |  |  |  |  |  | HRTV-4 22 |  |  |  |
| 783 | 1 |  |  |  |  |  |  |  |  | HRTV-4 23 |  |  |  |
| 784 | 1 |  |  |  |  |  |  |  |  | HRTV-4 24 |  |  |  |
| 785 | 1 |  |  |  |  |  |  |  |  | HRTV-4 25 |  |  |  |
| 786 | 1 |  |  |  |  |  |  |  |  | HRTV-4 26 |  |  |  |
| 787 | 1 |  |  |  |  |  |  |  |  | HRTV-4 27 |  |  |  |
| 788 | 1 |  |  |  |  |  |  |  |  | HRTV-4 28 |  |  |  |
| 789 | 1 |  |  |  |  |  |  |  |  | HRTV-4 29 |  |  |  |
| 790 | 1 |  |  |  |  |  |  |  |  | HRTV-4 30 |  |  |  |
| 791 | 1 |  |  |  |  |  |  |  |  | HRTV-4 31 |  |  |  |
| 792 | 1 |  |  |  |  |  |  |  |  | HRTV-4 32 |  |  |  |
| 793 | 1 |  |  |  |  |  |  |  |  | HRTV-4 33 |  |  |  |
| 794 | 1 |  |  |  |  |  |  |  |  | HRTV-4 34 |  |  |  |
| 795 | 1 |  |  |  |  |  |  |  |  | HRTV-4 35 |  |  |  |
| 796 | 1 |  |  |  |  |  |  |  |  | HRTV-4 36 |  |  |  |
| 797 | 1 |  |  |  |  |  |  |  |  | HRTV-4 37 |  |  |  |

|     |   |  |  |  |  |  |  |  |  |           |  |  |  |
|-----|---|--|--|--|--|--|--|--|--|-----------|--|--|--|
| 798 | 1 |  |  |  |  |  |  |  |  | HRTV-4 38 |  |  |  |
| 799 | 1 |  |  |  |  |  |  |  |  | HRTV-4 39 |  |  |  |
| 800 | 1 |  |  |  |  |  |  |  |  | HRTV-4 40 |  |  |  |
| 801 | 1 |  |  |  |  |  |  |  |  | HRTV-4 41 |  |  |  |
| 802 | 1 |  |  |  |  |  |  |  |  | HRTV-4 42 |  |  |  |
| 803 | 1 |  |  |  |  |  |  |  |  | HRTV-4 43 |  |  |  |
| 804 | 1 |  |  |  |  |  |  |  |  | HRTV-4 44 |  |  |  |
| 805 | 1 |  |  |  |  |  |  |  |  | HRTV-4 45 |  |  |  |
| 806 | 1 |  |  |  |  |  |  |  |  | HRTV-4 46 |  |  |  |
| 807 | 1 |  |  |  |  |  |  |  |  | HRTV-4 47 |  |  |  |
| 808 | 1 |  |  |  |  |  |  |  |  | HRTV-4 48 |  |  |  |
| 809 | 1 |  |  |  |  |  |  |  |  | HRTV-4 49 |  |  |  |
| 810 | 1 |  |  |  |  |  |  |  |  | HRTV-4 50 |  |  |  |
| 811 | 1 |  |  |  |  |  |  |  |  | HRTV-4 51 |  |  |  |
| 812 | 1 |  |  |  |  |  |  |  |  | HRTV-4 52 |  |  |  |
| 813 | 1 |  |  |  |  |  |  |  |  | HRTV-4 53 |  |  |  |
| 814 | 1 |  |  |  |  |  |  |  |  | HRTV-4 54 |  |  |  |
| 815 | 1 |  |  |  |  |  |  |  |  | HRTV-4 55 |  |  |  |
| 816 | 1 |  |  |  |  |  |  |  |  | HRTV-4 56 |  |  |  |
| 817 | 1 |  |  |  |  |  |  |  |  | HRTV-4 57 |  |  |  |
| 818 | 1 |  |  |  |  |  |  |  |  | HRTV-4 58 |  |  |  |
| 819 | 1 |  |  |  |  |  |  |  |  | HRTV-4 59 |  |  |  |
| 820 | 1 |  |  |  |  |  |  |  |  | HRTV-4 60 |  |  |  |
| 821 | 1 |  |  |  |  |  |  |  |  | HRTV-4 61 |  |  |  |
| 822 | 1 |  |  |  |  |  |  |  |  | HRTV-4 62 |  |  |  |
| 823 | 1 |  |  |  |  |  |  |  |  | HRTV-4 63 |  |  |  |
| 824 | 1 |  |  |  |  |  |  |  |  | HRTV-4 64 |  |  |  |
| 825 | 1 |  |  |  |  |  |  |  |  | HRTV-4 65 |  |  |  |
| 826 | 1 |  |  |  |  |  |  |  |  | HRTV-4 66 |  |  |  |
| 827 | 1 |  |  |  |  |  |  |  |  | HRTV-4 67 |  |  |  |









|     |   |  |  |  |  |  |  |           |  |  |  |  |  |
|-----|---|--|--|--|--|--|--|-----------|--|--|--|--|--|
| 948 | 1 |  |  |  |  |  |  | HHTV-1 56 |  |  |  |  |  |
| 949 | 1 |  |  |  |  |  |  | HHTV-1 57 |  |  |  |  |  |
| 950 | 1 |  |  |  |  |  |  | HHTV-1 58 |  |  |  |  |  |
| 951 | 1 |  |  |  |  |  |  | HHTV-1 59 |  |  |  |  |  |
| 952 | 1 |  |  |  |  |  |  | HHTV-1 60 |  |  |  |  |  |
| 953 | 1 |  |  |  |  |  |  | HHTV-1 61 |  |  |  |  |  |
| 954 | 1 |  |  |  |  |  |  | HHTV-1 62 |  |  |  |  |  |
| 955 | 1 |  |  |  |  |  |  | HHTV-1 63 |  |  |  |  |  |
| 956 | 1 |  |  |  |  |  |  | HHTV-1 64 |  |  |  |  |  |
| 957 | 1 |  |  |  |  |  |  | HHTV-1 65 |  |  |  |  |  |
| 958 | 1 |  |  |  |  |  |  | HHTV-1 66 |  |  |  |  |  |
| 959 | 1 |  |  |  |  |  |  | HHTV-1 67 |  |  |  |  |  |
| 960 | 1 |  |  |  |  |  |  | HHTV-1 68 |  |  |  |  |  |
| 961 | 1 |  |  |  |  |  |  | HHTV-1 69 |  |  |  |  |  |
| 962 | 1 |  |  |  |  |  |  | HHTV-1 70 |  |  |  |  |  |
| 963 | 1 |  |  |  |  |  |  | HHTV-1 71 |  |  |  |  |  |
| 964 | 1 |  |  |  |  |  |  | HHTV-1 72 |  |  |  |  |  |
| 965 | 1 |  |  |  |  |  |  | HHTV-1 73 |  |  |  |  |  |
| 966 | 1 |  |  |  |  |  |  | HHTV-1 74 |  |  |  |  |  |



**Table S14.** Interspersed repeats in haloarchaeal tailed virus genomes

| <b>Virus</b> | <b>Repeat positions (nt)</b>                                                                                                                                                                                                                                                                                                      | <b>Repeat position (ORF)</b>                                                                                                                      |
|--------------|-----------------------------------------------------------------------------------------------------------------------------------------------------------------------------------------------------------------------------------------------------------------------------------------------------------------------------------|---------------------------------------------------------------------------------------------------------------------------------------------------|
| HCTV-1       | 11800-11839/32323-32284                                                                                                                                                                                                                                                                                                           | upstream ORF29 and ORF57                                                                                                                          |
|              | 85535-85571/85454-85490                                                                                                                                                                                                                                                                                                           | ORF126 (tail tape measure protein)                                                                                                                |
| HCTV-2       | 16138-16026/31163-31274                                                                                                                                                                                                                                                                                                           | ORF29 and ORF48                                                                                                                                   |
|              | 15867-15902/15902-15867                                                                                                                                                                                                                                                                                                           | ORF28                                                                                                                                             |
|              | 2474-2430/43739-43783                                                                                                                                                                                                                                                                                                             | ORF6 and ORF73                                                                                                                                    |
| HCTV-5       | 74327-74452/72671-72796                                                                                                                                                                                                                                                                                                           | ORF114 (Zeta toxin-ParB)                                                                                                                          |
|              | 72830-72903/72116-72189                                                                                                                                                                                                                                                                                                           |                                                                                                                                                   |
|              | 72815-72950/65471-65606                                                                                                                                                                                                                                                                                                           | ORF114 (Zeta toxin-ParB) and ORF109 (ADP-ribosyltransferase)                                                                                      |
|              | 21729-21780/25413-25464                                                                                                                                                                                                                                                                                                           | ORF42 (HNH) and ORF49 (Hef-HNH)                                                                                                                   |
| HHTV-1       | 40328-40376/37691-37739                                                                                                                                                                                                                                                                                                           | upstream of ORF55 and ORF52                                                                                                                       |
| HHTV-2       | 121-158/158-121                                                                                                                                                                                                                                                                                                                   | ORF1                                                                                                                                              |
|              | 352-418/1662-1729                                                                                                                                                                                                                                                                                                                 | Upstream of ORF2 and ORF3                                                                                                                         |
| HRTV-4       | -                                                                                                                                                                                                                                                                                                                                 | -                                                                                                                                                 |
| HRTV-5       | 27867-27921/58256-58310                                                                                                                                                                                                                                                                                                           | upstream of ORF36/37 and ORF81/82                                                                                                                 |
|              | 28077-28119/58255-58296/59465-59507/59465-59507/                                                                                                                                                                                                                                                                                  | upstream of ORF38 (ribonucleotide reductase), ORF54, ORF81/82 and ORF83/84                                                                        |
| HRTV-7       | 46376-46318/47617-47675                                                                                                                                                                                                                                                                                                           | Upstream of ORF68/69 and ORF70/71                                                                                                                 |
| HRTV-8       | 28180-28223/56132-56175                                                                                                                                                                                                                                                                                                           | Upstream of ORF38 (ribonucleotide reductase) and ORF85/86                                                                                         |
|              | 27971-28023/37944-37997/52522-52574/54923-54975                                                                                                                                                                                                                                                                                   | upstream of ORF36/37, ORF52, ORF77, ORF83/84                                                                                                      |
| HGTV-1       | 128680-128730/130402-130452/131835-131885/132361-132411/132816-132866/133529-133579/133972-134022/134543-134593/135052-135102/135906-135956/136499-136549/137094-137144/137618-137668/138006-138056/138385-138435/138952-139002/139404-139454/139735-139785/140207-140257/140525-140575/141300-141350/141758-141808/142116-142166 | Upstream of or close to ORF276, ORF279, ORF283, ORF285, ORF286, ORF288, ORF289, ORF291, ORF293—ORF300, ORF302, ORF304-306, ORF308, ORF309, ORF311 |
|              | 123325-123364/123828-123867                                                                                                                                                                                                                                                                                                       | upstream of ORF259 and ORF260                                                                                                                     |
|              | 125979-126006/141781-141754                                                                                                                                                                                                                                                                                                       | upstream of ORF268 and in ORF310                                                                                                                  |
|              | 124967-125016/126403-126452                                                                                                                                                                                                                                                                                                       | upstream of ORF264 and ORF270                                                                                                                     |
|              | 867-809/22564-22622                                                                                                                                                                                                                                                                                                               | upstream of ORF3 and ORF25                                                                                                                        |
|              | 26254-26653/27558-27960                                                                                                                                                                                                                                                                                                           | ORF29 and ORF31                                                                                                                                   |
|              | 25087-25133/25276-25322                                                                                                                                                                                                                                                                                                           | ORF27                                                                                                                                             |
|              | 40319-40260/99900-99959                                                                                                                                                                                                                                                                                                           | ORF50 (LAGLIDADG endonuclease) and ORF205 (LAGLIDADG endonuclease)                                                                                |

**Table S15.** Tandem repeats in haloarchaeal tailed virus genomes

| <b>Virus</b> | <b>Nr. of repeats</b> | <b>Size of repeat</b> | <b>Consensus sequence</b>   | <b>Start position</b> | <b>Stop position</b> | <b>Region</b>                       |
|--------------|-----------------------|-----------------------|-----------------------------|-----------------------|----------------------|-------------------------------------|
| HCTV-1       | 2.2                   | 22                    | ACGACCGAAGAGACGAAAGACG      | 13738                 | 13785                | ORF30                               |
|              | 2.5                   | 12                    | TCGGTGCAGGAC                | 85281                 | 85310                | ORF126<br>Tail tape measure protein |
|              | 4.5                   | 27                    | CTGTGGGACACGTTTATCGTCGACCTG | 85457                 | 85578                |                                     |
|              | 4.3                   | 27                    | AAGATATCATCTGGGAAGCGTTCATCA | 85698                 | 85812                |                                     |
| HCTV-2       | 3.1                   | 9                     | ACGAGGACG                   | 16714                 | 16741                | ORF30                               |
|              | 1.9                   | 21                    | GGTGGCGCAGGACGGCGGCGT       | 16751                 | 16790                | ORF30                               |
|              | 2.1                   | 12                    | CAGCATGGGCCG                | 25284                 | 25308                | ORF42 tail tape measure protein     |
|              | 3.1                   | 18                    | TCCTGCTCGTCCTCGGCC          | 33804                 | 33859                | ORF57                               |
|              | 1.9                   | 21                    | CTCGTCTCGGCCACGTCGGC        | 33845                 | 33884                | ORF57                               |
|              | 2.0                   | 26                    | CGGGCGTCTCGTCTGCCCGGCTGC    | 41537                 | 41586                | ORF68                               |
| HCTV-5       | 2.1                   | 12                    | GGAGGACGAGGA                | 77026                 | 77050                | ORF118                              |
|              | 2.0                   | 20                    | CGCCTCGTCCTCAGCACGGA        | 93542                 | 93582                | intergenic ORF141-142               |
| HHTV-1       | 2.1                   | 14                    | CACGTATGTGGCCC              | 43547                 | 43577                | ORF63                               |
| HHTV-2       | 2.3                   | 15                    | GAGGACGACGACCGG             | 22993                 | 23026                | ORF37                               |
| HRTV-4       | 6.7                   | 12                    | GAGGACGACGAC                | 15584                 | 15660                | ORF37                               |
| HRTV-5       | 2.8                   | 12                    | GACGAGGAGGAG                | 7515                  | 7548                 | ORF12                               |
|              | 3.1                   | 14                    | TAGTTATACATTAG              | 59606                 | 59650                | intergenic ORF83-84                 |
|              | 3.2                   | 10                    | GGAGAGACGG                  | 75824                 | 75855                | ORF122                              |
| HRTV-7       | 2.2                   | 18                    | CGAAAGCCGGGGTGAGC           | 1646                  | 1685                 | ORF1                                |
|              | 4.3                   | 7                     | GGGTCGG                     | 1799                  | 1828                 | ORF2                                |
|              | 2.0                   | 20                    | CGCCTCAACGACATCGTGAA        | 15605                 | 15644                | ORF23                               |
|              | 2.3                   | 16                    | ACTCTAAGAGATAGAA            | 21220                 | 21254                | ORF30 (baseplate J-like protein)    |
| HRTV-8       | 7.5                   | 6                     | CCGGGG                      | 159                   | 203                  | Intergenic ORF128-ORF1              |
|              | 2.1                   | 15                    | GAGGAAGACGAGGAG             | 7582                  | 7613                 | ORF12                               |
|              | 7.5                   | 6                     | CCGGGG                      | 74332                 | 74376                | Intergenic ORF128-ORF1              |
| HGTV-1       | 2.5                   | 16                    | CCGAAATGTCGAAATA            | 142214                | 142253               | ORF312                              |

**Table S16.** Amino acid identity percentages of halovirus proteins belonging to superfamily cl00641 and other members of that superfamily from haloarchaea derived from non-redundant protein database at NCBI. Identities  $\geq 19.5\%$  are marked in orange.

| Accession number or Virus ORF number | HCTV-1_<br>ORF87 | HCTV-5_<br>ORF90 | HGTV-1_<br>ORF189 | HGTV-1_<br>ORF39 | HRTV-5_<br>ORF62 | HRTV-7_<br>ORF51 | HRTV-8_<br>ORF65 |
|--------------------------------------|------------------|------------------|-------------------|------------------|------------------|------------------|------------------|
| AAV44425.1                           | 15.1             | 17.0             | 3.9               | 13.1             | 10.6             | 10.6             | 10.7             |
| AAV45925.1                           | 6.2              | 7.5              | 3.1               | 7.4              | 7.6              | 10.3             | 7.6              |
| ACM57283.1                           | 5.9              | 6.6              | 3.8               | 7.4              | 8.1              | 8.8              | 7.6              |
| ACM57919.1                           | 6.0              | 4.1              | 3.0               | 3.9              | 2.2              | 4.2              | 6.2              |
| ACM58849.1                           | 11.6             | 11.8             | 18.5              | 13.7             | 13.4             | 10.1             | 14.4             |
| ACM59027.1                           | 8.1              | 4.5              | 4.8               | 7.9              | 9.2              | 7.2              | 9.8              |
| ACM59084.1                           | 13.4             | 18.3             | 12.3              | 12.3             | 16.7             | 9.0              | 15.4             |
| ACV10642.1                           | 6.3              | 7.1              | 3.7               | 5.5              | 7.4              | 8.9              | 7.1              |
| ACV11626.1                           | 13.8             | 16.2             | 10.8              | 12.1             | 17.3             | 13.1             | 16.5             |
| ACV11887.1                           | 4.8              | 5.4              | 3.2               | 5.2              | 7.7              | 6.1              | 7.8              |
| ACV12090.1                           | 5.4              | 5.2              | 1.7               | 5.3              | 7.9              | 7.4              | 5.7              |
| ADB58945.1                           | 13.3             | 17.7             | 13.4              | 10.9             | 16.2             | 12.2             | 15.9             |
| ADB61785.1                           | 6.2              | 6.2              | 4.4               | 7.5              | 7.9              | 7.6              | 7.1              |
| ADB62071.1                           | 5.4              | 5.2              | 2.8               | 5.3              | 5.3              | 5.7              | 6.9              |
| ADD04643.1                           | 5.6              | 5.8              | 3.9               | 7.6              | 8.2              | 7.8              | 7.4              |
| ADD05285.1                           | 14.5             | 15.8             | 14.5              | 10.8             | 9.4              | 6.1              | 9.5              |
| ADD05961.1                           | 5.4              | 5.1              | 2.9               | 5.0              | 6.8              | 5.2              | 5.7              |
| ADE02138.1                           | 15.1             | 13.6             | 18.0              | 12.7             | 11.0             | 11.7             | 10.9             |
| ADE04273.1                           | 15.2             | 17.3             | 9.2               | 2.5              | 13.2             | 12.9             | 12.5             |
| ADE04881.1                           | 6.5              | 6.0              | 4.3               | 7.5              | 7.9              | 8.2              | 7.5              |
| ADE04903.1                           | 5.7              | 4.7              | 3.1               | 4.3              | 6.3              | 5.6              | 6.6              |
| ADJ13477.1                           | 16.1             | <b>19.5</b>      | 9.7               | 11.7             | 15.4             | 15.5             | 17.3             |
| ADJ14856.1                           | 8.4              | 10.0             | <b>20.2</b>       | 3.2              | 10.0             | 12.2             | 7.0              |
| ADJ15210.1                           | 6.4              | 6.8              | 3.6               | 8.2              | 8.2              | 9.2              | 8.7              |
| ADQ66828.1                           | 6.6              | 6.5              | 3.6               | 7.1              | 8.4              | 8.7              | 7.3              |
| ADQ66884.1                           | 5.4              | 4.5              | 3.4               | 5.0              | 5.7              | 5.6              | 4.6              |
| ADQ66885.1                           | 19.0             | 19.0             | 12.9              | 16.1             | 15.6             | <b>19.6</b>      | 18.3             |
| ADQ68575.1                           | 4.7              | 6.0              | 3.7               | 4.3              | 6.1              | 6.4              | 6.7              |
| ADQ68576.1                           | 7.3              | 5.9              | 4.1               | 7.7              | 9.3              | 7.8              | 10.1             |
| AEM58700.1                           | 5.4              | 5.9              | 3.6               | 7.5              | 6.0              | 8.3              | 5.5              |
| CAI48803.1                           | 16.6             | 18.5             | 13.2              | 14.1             | 3.3              | 14.7             | 16.8             |
| CAI49563.1                           | 5.5              | 6.7              | 3.0               | 7.0              | 8.6              | 8.6              | 8.2              |
| CAI50018.1                           | 7.5              | 7.6              | 7.8               | 9.9              | 1.4              | 13.5             | 10.0             |
| CAI50025.1                           | 4.9              | 4.8              | 2.6               | 6.6              | 6.7              | 7.8              | 6.6              |
| CAI50026.1                           | 6.2              | 5.7              | 2.6               | 4.1              | 7.9              | 7.6              | 7.9              |
| CAI50902.2                           | 18.7             | 16.7             | 10.0              | 15.3             | 17.3             | 13.9             | 17.5             |
| CAP14083.1                           | 6.7              | 6.8              | 2.9               | 7.5              | 10.1             | 9.1              | 8.1              |
| CAP15640.1                           | 5.0              | 4.6              | 2.4               | 4.2              | 6.4              | 6.6              | 6.8              |
| CAP15641.2                           | 6.5              | 6.6              | 3.7               | 5.3              | 8.3              | 8.5              | 6.0              |
| EHB56722.1                           | 17.1             | <b>22.6</b>      | 10.1              | 14.9             | <b>20.0</b>      | 17.5             | 19.3             |
| EHB56793.1                           | 14.3             | 15.4             | 18.9              | 12.2             | 12.0             | 9.6              | 12.2             |

|                |              |              |              |              |              |              |              |
|----------------|--------------|--------------|--------------|--------------|--------------|--------------|--------------|
| HCTV-1_ORF87   | <b>100.0</b> | <b>61.7</b>  | 13.6         | 10.8         | <b>19.5</b>  | <b>20.5</b>  | 19.1         |
| HCTV-5_ORF90   | <b>61.7</b>  | <b>100.0</b> | 10.7         | <b>19.5</b>  | <b>20.8</b>  | 17.8         | 18.9         |
| NP_861634      | <b>20.8</b>  | <b>20.5</b>  | 10.1         | 17.1         | <b>89.7</b>  | <b>37.9</b>  | <b>84.1</b>  |
| NP_542546      | <b>20.8</b>  | <b>20.5</b>  | 10.1         | 17.1         | <b>89.7</b>  | <b>37.9</b>  | <b>84.1</b>  |
| HGTV-1_ORF189  | 13.7         | 10.7         | <b>100.0</b> | 8.4          | 8.8          | 7.8          | 7.7          |
| HGTV-1_ORF39   | 10.8         | <b>19.5</b>  | 8.4          | <b>100.0</b> | 16.0         | 16.0         | 16.1         |
| HRTV-5_ORF62   | <b>19.5</b>  | <b>20.8</b>  | 8.8          | 16.0         | <b>100.0</b> | <b>36.8</b>  | <b>91.7</b>  |
| HRTV-7_ORF51   | <b>20.5</b>  | 17.8         | 7.8          | 16.0         | <b>36.8</b>  | <b>100.0</b> | <b>36.8</b>  |
| HRTV-8_ORF65   | 19.1         | 18.9         | 7.7          | 16.1         | <b>91.7</b>  | <b>36.8</b>  | <b>100.0</b> |
| NP_280319.1    | 7.2          | 7.2          | 3.1          | 7.8          | 10.3         | 8.9          | 8.4          |
| YP_001690750.1 | 6.8          | 6.8          | 3.9          | 5.6          | 8.6          | 8.8          | 6.2          |
| YP_002564620.1 | 6.6          | 6.0          | 2.7          | 4.7          | 8.3          | 5.3          | 5.3          |
| YP_002564621.1 | 7.3          | 6.7          | 3.7          | 7.0          | 9.2          | 9.5          | 8.8          |
| YP_002564646.1 | 6.6          | 6.5          | 2.4          | 3.7          | 8.1          | 8.3          | 8.1          |
| YP_002567430.1 | 11.6         | 9.5          | 2.8          | 13.4         | 0.9          | 5.9          | 0.6          |
| YP_002567714.1 | 17.6         | 12.0         | 7.2          | 13.7         | 9.7          | 6.1          | 5.3          |
| YP_002567746.1 | 11.1         | 9.2          | 2.9          | 15.4         | 15.0         | 1.6          | 16.2         |
| YP_003130454.1 | 13.2         | 16.1         | 8.5          | 6.2          | 16.0         | 13.0         | 15.8         |
| YP_003130621.1 | 7.2          | 8.1          | 4.1          | 6.1          | 9.9          | 9.1          | 9.3          |
| YP_003130824.1 | 7.4          | 7.5          | 4.2          | 6.1          | 9.5          | 9.1          | 9.7          |
| YP_003175762.1 | 5.3          | 4.8          | 2.3          | 4.8          | 5.7          | 7.1          | 5.8          |
| YP_003176726.1 | 13.5         | 13.3         | 14.0         | 10.0         | 17.1         | 15.0         | 16.5         |
| YP_003177931.1 | 6.5          | 6.1          | 3.1          | 7.1          | 7.7          | 9.6          | 7.6          |
| YP_003178649.1 | 16.4         | 12.6         | 18.6         | 11.4         | 10.9         | 11.7         | 12.3         |
| YP_003533884.1 | 12.2         | 11.2         | 8.2          | 3.1          | 7.0          | 3.6          | 8.3          |
| YP_003535784.1 | 8.6          | 9.8          | 5.8          | 7.4          | 1.3          | 13.3         | 8.5          |
| YP_003738491.1 | 4.2          | 4.5          | 2.6          | 4.7          | 5.7          | 6.3          | 5.3          |
| YP_003738492.1 | 4.9          | 4.6          | 3.2          | 4.5          | 8.2          | 8.8          | 7.9          |
| YP_004586129.1 | 19.3         | <b>19.7</b>  | 11.1         | 15.7         | 13.9         | 8.7          | 14.2         |
| YP_004595509.1 | 7.4          | 7.7          | 3.2          | 3.3          | 9.7          | 8.2          | 10.0         |
| YP_004595510.1 | 5.0          | 4.8          | 3.1          | 3.6          | 7.2          | 6.3          | 6.1          |
| YP_004596959.1 | 5.0          | 6.1          | 4.1          | 7.1          | 7.8          | 7.8          | 7.7          |
| YP_004598292.1 | 5.7          | 5.4          | 2.5          | 4.5          | 6.0          | 6.4          | 5.3          |
| YP_004785685.1 | 6.6          | 7.1          | 3.5          | 7.2          | 8.4          | 8.8          | 8.7          |
| YP_004785822.1 | 15.1         | 16.4         | 17.8         | 12.1         | 6.0          | 11.5         | 11.4         |
| YP_004796178.1 | 6.3          | 7.6          | 3.2          | 7.5          | 7.7          | 8.5          | 7.7          |
| YP_005839106.1 | 19.3         | <b>21.1</b>  | 15.6         | 11.0         | 16.6         | 9.7          | 14.4         |
| YP_005839926.1 | 7.6          | 7.2          | 4.4          | 7.9          | 8.8          | 8.8          | 9.0          |
| YP_005839927.1 | 6.2          | 6.2          | 3.1          | 4.5          | 6.3          | 5.5          | 6.3          |
| YP_005839934.1 | 13.7         | 12.7         | 17.5         | 11.9         | 11.2         | 11.0         | 12.1         |
| YP_005839955.1 | 14.0         | 5.9          | 3.3          | 10.3         | 6.0          | 6.1          | 16.5         |
| YP_005840739.1 | 5.7          | 6.4          | 3.2          | 6.8          | 7.9          | 6.5          | 7.5          |
| YP_006347987.1 | 16.2         | <b>19.5</b>  | 12.1         | 16.5         | 13.9         | 12.6         | 12.8         |
| YP_006350441.1 | 6.5          | 5.9          | 4.2          | 7.8          | 7.3          | 9.0          | 7.6          |
| YP_006351428.1 | 2.4          | 15.8         | 4.0          | 11.5         | 11.9         | 8.2          | 11.2         |
| YP_134235.1    | 17.0         | 5.0          | 4.0          | 15.6         | 2.5          | 12.8         | 2.8          |

|               |             |             |             |      |      |      |      |
|---------------|-------------|-------------|-------------|------|------|------|------|
| YP_137099.1   | 13.1        | 18.2        | 8.1         | 12.0 | 14.7 | 12.9 | 14.6 |
| YP_327283.1   | <b>21.1</b> | <b>22.2</b> | 10.3        | 11.2 | 19.0 | 11.6 | 13.1 |
| YP_657900.1   | 7.3         | 5.5         | 4.4         | 7.8  | 8.9  | 8.9  | 9.0  |
| YP_657901.1   | 5.1         | 6.2         | 3.4         | 4.9  | 6.0  | 5.6  | 6.0  |
| YP_658634.1   | 5.7         | 6.4         | 3.9         | 6.8  | 7.8  | 6.9  | 7.6  |
| ZP_08043416.1 | 5.9         | 7.7         | 3.9         | 7.5  | 8.2  | 8.2  | 7.8  |
| ZP_08046055.1 | 9.7         | 12.3        | 4.5         | 10.9 | 11.0 | 10.9 | 9.7  |
| ZP_08558864.1 | 6.8         | 6.9         | 3.1         | 5.9  | 8.8  | 8.8  | 8.2  |
| ZP_08558865.1 | 4.7         | 4.0         | 3.1         | 3.9  | 6.1  | 6.0  | 6.4  |
| ZP_08558872.1 | 16.8        | 13.1        | 8.0         | 13.8 | 15.3 | 14.5 | 10.2 |
| ZP_08559182.1 | 7.0         | 7.3         | 4.2         | 5.9  | 9.3  | 9.1  | 9.1  |
| ZP_08559183.1 | 4.8         | 6.0         | 3.2         | 5.2  | 7.2  | 6.3  | 7.0  |
| ZP_08560032.1 | 12.3        | 2.7         | 7.6         | 9.7  | 1.4  | 16.1 | 1.1  |
| ZP_08560869.1 | 8.9         | 9.7         | 8.7         | 18.4 | 11.4 | 15.1 | 14.1 |
| ZP_08561299.1 | 12.8        | 10.0        | 12.9        | 12.4 | 17.4 | 12.8 | 14.4 |
| ZP_08561572.1 | 6.9         | 8.4         | 3.3         | 6.4  | 9.4  | 10.6 | 9.6  |
| ZP_08561573.1 | 5.5         | 5.7         | 2.9         | 5.0  | 8.0  | 6.2  | 7.8  |
| ZP_08561724.1 | 7.1         | 7.1         | 3.7         | 6.7  | 7.6  | 8.9  | 7.3  |
| ZP_08562196.1 | 14.4        | 14.9        | 6.7         | 12.4 | 15.3 | 17.2 | 16.8 |
| ZP_08963685.1 | 10.9        | 6.5         | 8.5         | 9.1  | 17.4 | 17.1 | 16.5 |
| ZP_08963686.1 | 5.1         | 5.3         | 3.3         | 4.4  | 5.4  | 6.2  | 5.7  |
| ZP_08964026.1 | 16.3        | 17.3        | 8.4         | 12.7 | 9.0  | 15.5 | 9.4  |
| ZP_08965165.1 | 5.9         | 6.5         | 4.1         | 7.1  | 7.6  | 9.0  | 7.2  |
| ZP_08965468.1 | 7.9         | 7.4         | 3.9         | 6.3  | 9.4  | 10.2 | 10.7 |
| ZP_08965469.1 | 6.0         | 5.2         | 1.6         | 5.2  | 6.1  | 6.4  | 7.5  |
| ZP_08965593.1 | 6.5         | 6.5         | 3.1         | 6.5  | 8.4  | 9.0  | 8.0  |
| ZP_08965594.1 | 6.3         | 5.2         | 3.1         | 3.9  | 6.0  | 6.0  | 5.7  |
| ZP_08967159.1 | 8.9         | 6.1         | 3.6         | 7.8  | 7.8  | 8.7  | 7.5  |
| ZP_08968424.1 | 15.0        | 13.4        | 18.7        | 13.5 | 8.5  | 13.1 | 8.6  |
| ZP_08968710.1 | 13.7        | 13.5        | 8.3         | 11.4 | 14.7 | 14.0 | 14.5 |
| ZP_08968711.1 | 5.6         | 5.0         | 3.1         | 5.0  | 6.0  | 6.4  | 5.5  |
| ZP_09027914.1 | 13.5        | <b>20.9</b> | 14.3        | 7.8  | 15.4 | 15.7 | 14.8 |
| ZP_09028183.1 | 14.6        | 17.4        | 11.3        | 7.8  | 10.5 | 7.6  | 11.2 |
| ZP_09028711.1 | 7.2         | 7.1         | 4.0         | 7.0  | 8.1  | 8.7  | 8.1  |
| ZP_09030271.1 | 5.9         | 4.3         | 3.7         | 4.6  | 6.7  | 6.2  | 7.1  |
| ZP_09030272.1 | 6.0         | 6.5         | 4.3         | 6.2  | 8.8  | 8.5  | 9.1  |
| ZP_09030564.1 | 16.4        | 8.6         | 10.1        | 6.5  | 13.9 | 12.8 | 14.1 |
| ZP_09946184.1 | 10.3        | 8.0         | 13.2        | 8.0  | 4.1  | 6.8  | 2.8  |
| ZP_09947326.1 | 5.7         | 5.5         | 2.4         | 4.4  | 5.4  | 5.5  | 5.6  |
| ZP_09948039.1 | 5.4         | 5.7         | 4.2         | 7.0  | 8.2  | 8.4  | 7.8  |
| ZP_09950156.1 | 7.4         | 7.6         | 3.9         | 8.2  | 9.5  | 9.2  | 9.5  |
| ZP_09950157.1 | 6.4         | 5.9         | 2.7         | 4.7  | 6.4  | 6.4  | 6.1  |
| ZP_09950187.1 | 11.6        | 14.0        | <b>21.6</b> | 12.1 | 12.4 | 10.3 | 11.1 |
| ZP_09950214.1 | 6.9         | 6.8         | 3.1         | 5.8  | 7.5  | 8.5  | 7.8  |
| ZP_09950215.1 | 4.9         | 3.8         | 2.6         | 4.3  | 7.3  | 6.6  | 4.8  |
| ZP_09950274.1 | 4.1         | 9.2         | 7.7         | 11.2 | 11.5 | 5.5  | 11.5 |

# SUPPLEMENTARY FIGURES

## A

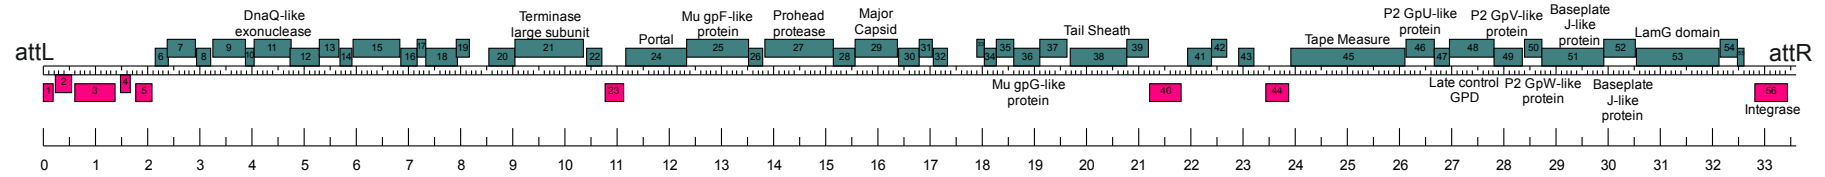

## B

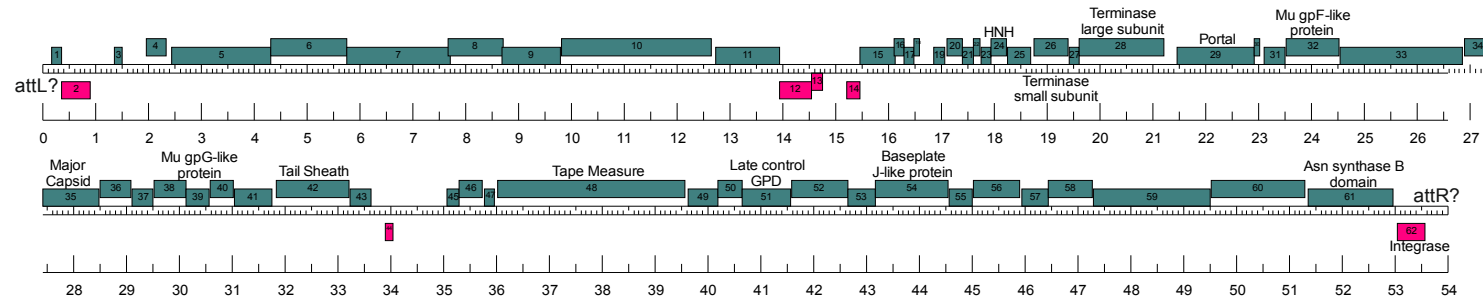

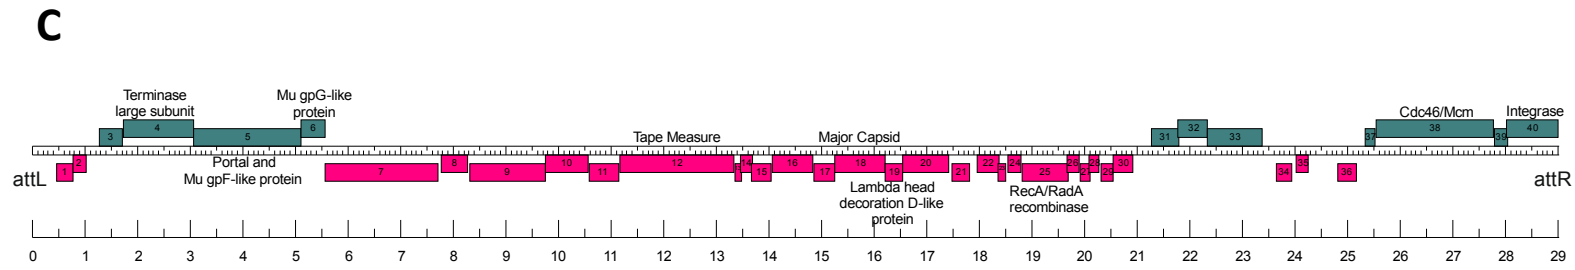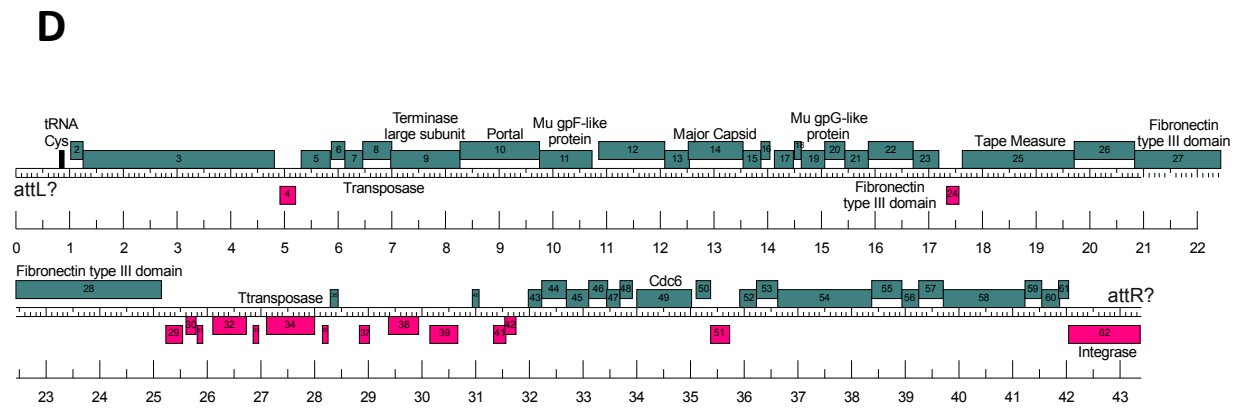

**Figure S1.** Genome maps of haloarchaeal proviral regions related to tailed viruses. (A) Aprof (B) Hjeo (C) Mokin (D) Ngreg

Aprof

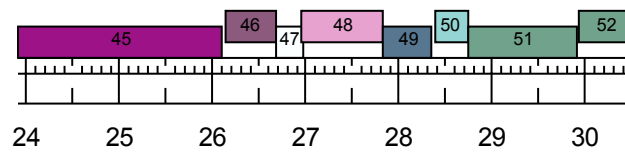

Hjeo

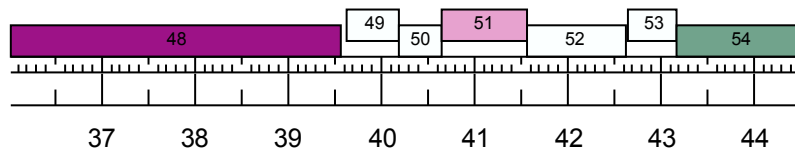

HGTV-1

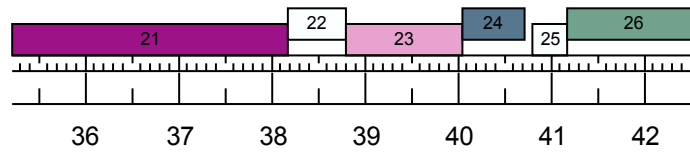

P2

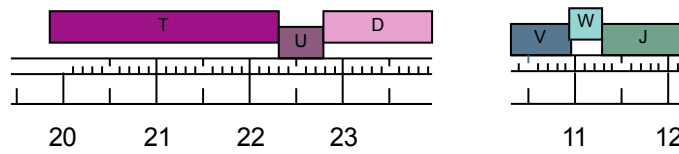

**Figure S2.** Maps of genome regions coding for putative homologues of P2 tail structural and assembly proteins. ORFs encoding putative homologues have the same color. Aprof and Hjeo are proviral regions identified during this study (Supplementary results 1).



>HF2\_67312-67379  
CGGC**GAAA**CGCCCCACCGTGGGGCG**TCGTC**GGGAGTTGGTCATCCCCGGC**TGTTGACGAG**CCCGACCAGA  
1213 1415 16 17 2 2a2b3 4 5 6 7 8 9

>HF1\_65540-65607  
CGGC**GAAA**CGCCCCACCGTGGGGCG**TCGTC**GGGAGTTGGTCATCCCCGGC**TGTTGACGAG**CCCGACCAGA

>HRTV-5\_65998-66064  
TGGC**GAAA**CGCCCCACCGTGGGGCG**TCGTC**GGGAGTTGGTCGTCCCCGGC**TGTTGACGAG**CCCGACCAG

>HRTV-8\_63409-63474  
CGGC**GAAA**CGCCCCACTTTGGGGCG**TCGTC**GGGAGTTGGTCCCCCGGC**TGTTGACGAG**CTGACCAG

>HRTV-8\_65506-65572  
TGGC**GAAA**CACCCCATCGAGGGGTG**TC**ACTACCCGGTGGTTCGGGTAGT**CTGATGAT**GCCAGCCACG

**Figure S3.** Ribozymes in haloarchaeal tailed viruses. Header consists of virus name and ribozyme position in the genome (nt). Ribozyme catalytic site residues are in bold and are numbered below the HF2 ribozyme sequence. Complementary regions forming stems are underlined with straight lines. Regions forming pseudoknot structures are underlined with wavy lines.

## I group

108\_HNH YGGRWDAKR-EKAILADSEQCASCGMTRAEHKQVYGRDLHVHKKIPVRFVDD-----VSDAHFEVNLVTVCM-ECHEEFD  
ZP\_10771382.1\_Halogramma YGSNWERQR-QEALERDDFCQHCCGLTNSEHKTERGQELVHHRVKRRAFDD-----YRDANQVENLVTLCR-ACHYDAE  
YP\_134093.1\_Haloarcula YGSDWASYS-IDALLEWEGRCASCGLTEPTHIRTYGKSLDIHHEPPVEEFDD-----IETAHEEAELQPVCV-KCHSKVE  
YP\_003129161.1\_Halorhabdus YGPSWSSAR-RKARERDGYTCQRCGMDDEHLDEYGHKLVHVKIKPFRTFDD-----HEDANDLGNLITVCL-DCHNRLE  
YP\_003482340.1\_Natrialba YGEGWNKKKERVRERDGRCQHCCGRGEQEHVKLFGTKHIVHVVVPARSIED-----AQERNAMKNLVTLCRGDCHRWKVE  
104\_HNH FGSNWEKQR-AKALERDK-VCQRCGEDGS----D--ARLSVHHLLEPRRSFDRDDL--EEKANDLSNLVVLICM-PCHGAVE  
106\_HNH YGENWYAVR-RKVRSRDE-VCQKCGSDGT----D--CLLDVHHIDPIRTFEK-----PEEANTMDNLILLICR-SCHRAVE  
89\_HNH YGSTWDEKR-EMVLERDNYECRVCGRQ-----MVSDPLVHHLVVKKFD-----PDNAHTRDNLITLCA-THRLVE  
111\_HNH YGHTWSRMR-EKALDRDGYCQVCGSEE-----QLVHHLKLPVRTFDD-----PNEAHYMVNLVTCV-TCHPKLD  
YP\_004598316.1\_Halopiger YGREWWRIR-RRALERDGYECQHCCGAGPD---ELGQNPVHVRPVSFDR-----PEDAHTMDNVVS-----HRRAE  
ZP\_08962642.1\_Natrinema YNGRWREIR-RQALERDEHTCQHCCGLTRE----EIGHEPDVHHITPVREFND-----PQLAHTLDNVVCLICR-SCHRYAE  
ZP\_09029765.1\_Halobacterium YGPAWWEVR-RMALERDDYECQNCGAGVA---ELGRNPVHHIEPVREFED-----PEEAHRLDNVVCLICR-PCHRRIE  
AFH21819.1\_halophage YGPNWEEQR-DACLERDNYRCQACGVSNEE---APIALNAHHIQPFRTFDN-----REEANRLDNLVALICL-SCHGKWE  
YP\_09949009.1\_Halobiforma YGRQWWRIR-RRALERDDHECQHCCGATRE----EIGRNPVHHLLEPVRSFDR-----PEEAHTLSNVVALICR-RCHRAE  
YP\_003130543.1\_Halorhabdus YGQGWNAVR-REALERDEYECVHCCGTGSD---SLGRNPVHHIIPVRAFVTSRHEKTDATIDNVVSLICP-SCHRAE  
ZP\_08559989.1\_Halorhabdus YGQGWNAVR-REALERDEYECVHCCGIGSE---SLGRNPVHHIIPVRAFVTSRHEKTDATIDNVVSLICP-SCHRAE  
YP\_137220.1\_Haloarcula YGPGWRAVR-EQALARDDHACVLCGTNAD---ELGRNPVHHIIPVRLFAALRALAVRDAHTLDNVVSLICP-SCHRRTE

## II group

42\_HNH AHRVVLML-H---GD---SPG-SQYVLEHCDNPSCVNPDELYIGTQQDNMDDWQ  
49\_HNH AHRFSYMLEY---GV---IE-DDFVLEHCDNKSCVNPDELYSGDHSNMQDRA  
56\_HNH AHRVAYRLEV---ED---PD-GSNVLEHCDNRSCVNPDELYLGTQEDNIKDRD  
YP\_001353918.1\_Janthinobacterium AHRAAYELYV---GP---IKD-GLHVCRCNDRSCVNPDEHFLGTNHNENVADRQ  
NP\_521314.1\_Ralstonia AHRVAYELCV---AP---IPD-GMVACRCNDRACVNPDEHFIATQRENILDMV  
NP\_521357.1\_Ralstonia AHRLAYQLFH---GI---VLERSQHVLHRCPTACVNPDEHFLFIGTQQDNMRDMR  
YP\_002003969.1\_phage\_13a VHRLEWIKQR---GP---IPE-GLVVRHRCNPKCYNIEHLELGTQDNTRDRV  
YP\_002280691.1\_Rhizobium AHRVSYECFH---HE---IPA-GMFVCHRCNDRKCANPDEHFLGTQDNSSDMV  
YP\_002328232.1\_Escherichia SHRVAFELYH---SP---IPS-GKMVCHRCNDRQCCVNPDEHFLGSAQENMDDKI  
YP\_002964909.1\_Methylobacterium AHRMAYRLAK---GS---FDE-RLFVCHRCNDRPCCVNPDEHFLWLGTHRQNMDDMF  
YP\_002982221.1\_Ralstonia AHRLAFLVEKH---GLALSDID-GQFVVRHRCNDRPACVNPDEHLELGTQDNMRDMV  
YP\_003325164.1\_Xylanimonas AHRVSAELA---DM---DVA-GRVVRHRCNDRPCCVNPDEHFLVPGTQAQNAVDMA  
YP\_003897184.1\_Halomonas AHRASYLIHK---GP---IPE-GLVVCHTCNDPACVNPDEHFLWLGTHMDNTQDMM  
AAP78667.1\_Myxooccus\_phage AHRVAYELAT---GTR---LLP-SVLVCHRCNDRRCCNPAHFLFAGTHADNADMC  
NP\_888749.1\_Bordetella AHCASFRLV---GD---IPA-GMYVCHRCNDRPCCVNPDEHFLGTQDNQADMA  
YP\_005098368.1\_Synechoc.phage THRLAWEFAP---GQ---IPE-GLVVRHRCNDRPCCVNPDEHLLLGTHKDNFNDKI  
AFH22805.1\_Halophage THRVLQTHGE--GF---TEE-KNFCCRCNDRPCCVNPDEHFLFAGSHKDNMEDAT  
YP\_002280661.1\_Rhizobium AHRALMASTAKFNP---LP---SDFACHRCNDRPCCVNPDEHLYWGDALNLRADCM  
AFH75206.1\_Streptomyces AHRVAFQHAY---GY---LP---PVVRHRCNDRPCCVNPDEHLLPGTHKDNQADMA  
ZP\_10176254.1\_Pseudomonas AHRLSYELSK---GK---IPD-GMVVHRCNDRPACINPDEHFLVLTQKDNMEDMY  
ZP\_10243912.1\_Nitrolanceus VHRLAAMIWL---GL---DPVSSLSVCHRCNDRPACINPDEHFLVLTQKDNMEDMY

|                                 |                                                           |
|---------------------------------|-----------------------------------------------------------|
| ZP_10244310.1_Nitrolancetus     | SHRLAYIMAF---GP---IPD-GLHVLHHC DNPPCVNPSLFLGTARANVHDME    |
| ZP_00209001.1_Magnetospirillum  | AHRLSYRLHC---GE---VPT-GLGVLEHCDVRCCVNPDHLYAGTTQQNNADRT    |
| YP_224185.1_phage_ES18          | AHRLSYEFYSK---GI---IPE-GKVVILCDNPSCVNPKHLAVGTVSDNNADMR    |
| YP_369478.1_Burkholderia        | SHRVSYMLFN---GD---IPS-GLHVLHRC DVPCCANPNHLWLGTNDQNVQDKV   |
| NP_041971.1_phage_T7            | CHRVMS-----N---APK-GSTVLEHSCDNPLCCNPEHLSIGTPKENSTDMV      |
| AAP33980.1_phage_T7             | CHRVMS-----N---APK-GSTVLEHSCDNPLCCNPEHLSIGTPKENSIDMV      |
| AAP34081.1_phage_T7             | CHRVMS-----N---APK-DSTVLEHSCDNPLCCNPEHLSIGTPKENSTDMV      |
| ZP_10244345.1_Nitrolancetus     | AHRISWELAN---GP---IPE-GLFVCHRC DNPPCVRPDHFLFGTPADNMHDRS   |
| EJO27443.1_Achromobacter        | AHRVSYEMFV---GV---AG-EMHVLHCCDNPSCVRPDHFLFLGSKDNVDDKV     |
| EKA33187.1_Pseudomonas          | AHRASYEINC---GP---IDN-GLHVLHRC DNPRCVRPDHFLFLGTHLENMQDMV  |
| YP_004109297.1_Rhodopseudomonas | AHRVALAL-S---GK---NVV-GRFVLEHRC DNPS CVRPDHLRRGSHKDNMADMT |
| YP_002982223.1_Ralstonia        | AHIASYVAAN---GP---LAP-GMCMVHVC DNPLCVRPDHLEAGTDADNMNDKT   |

### III group

|                          |                                                      |
|--------------------------|------------------------------------------------------|
| 22_HNH                   | IHRLAVSEHGFDVAV----RDKHVHHRNGIPWDNRPGNIEVLTEEEHKSLEH |
| 77_HNH                   | VHRLVAVAQFGFEAV----CGNQVHHKTGIKWDNRPSNLTLTPSDHASRH   |
| YP_003479797.1_Natrialba | VHRLAVSEYGYEEV----GQKVVHHRNGIPWDNRPANIEVLTAEEHGRIH   |
| YP_004598852.1_Halopiger | IHRLVMVAERGFDA----VADKHVHHRNGVRFDNRPENLELLSRSEHAERH  |
| AFH22156.1_halophage     | IHRLVAVAEYGVKAT----ENKQIHHKNGVKWDNRPENLICMSNSEHQRHE  |
| AFH21445.1_halophage     | IHRLVVVAEGADPHKVFGLSHVHHKNEIPWDNRPENLEVVTQSEHKKIHH   |
| AFH21837.1_halophage     | VHQLVAIADGANPSKIFSNGRYHVHHRNGVKWDNRPENLELQSAKTHAIEH  |
| AFH22067.1_halophage     | VHRLIAVAEGLLDPSDFRDFDTVVHHRKSEHGLDNRPNLKVMERGEHQSMH  |

**Figure S4.** Alignments of the conserved regions of HCTV-5 HNH endonucleases and related homologues from database. HNH catalytic motif residues are marked in green. Cysteine dyads are marked in yellow. Other residues conserved among the members of a given group are marked in grey.

### I group

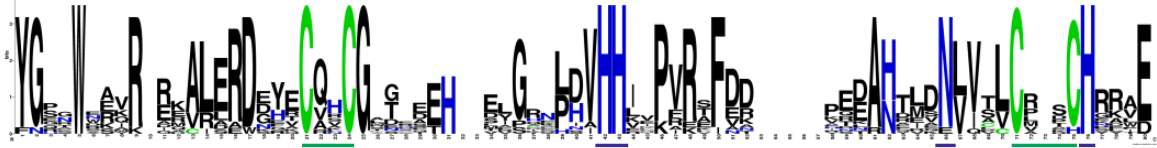

### II group

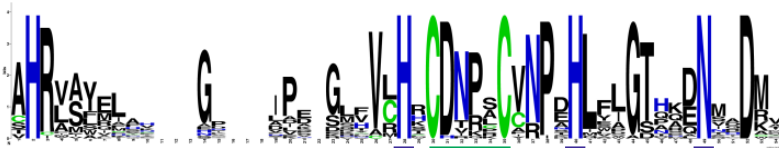

### III group

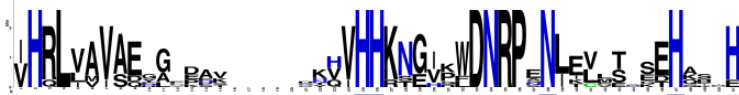

**Figure S5.** Conserved residues of aligned regions from HCTV-5 HNH homing endonucleases and homologues retrieved from the database. HNH catalytic motif residues are marked in blue. Cysteine dyads are marked in green.

```
Pyrococcus yayanosii CH1 41390 GAGGGCGGGGCTGGCGTGG-AGGATGAACGCGGTTCG 41424
HRTV-7 5775 GAGGGCGGGGCTGGCG-GGCAGGGTGAA-GCGGTTCG 5808
```

**Figure S6.** Alignment of *Pyrococcus yayanosii* CH1 (CRISPR ID NC\_015680\_2\_3) and corresponding HRTV-7 genome nucleotide sequence. Matching residues are marked in yellow.

HGTV-1

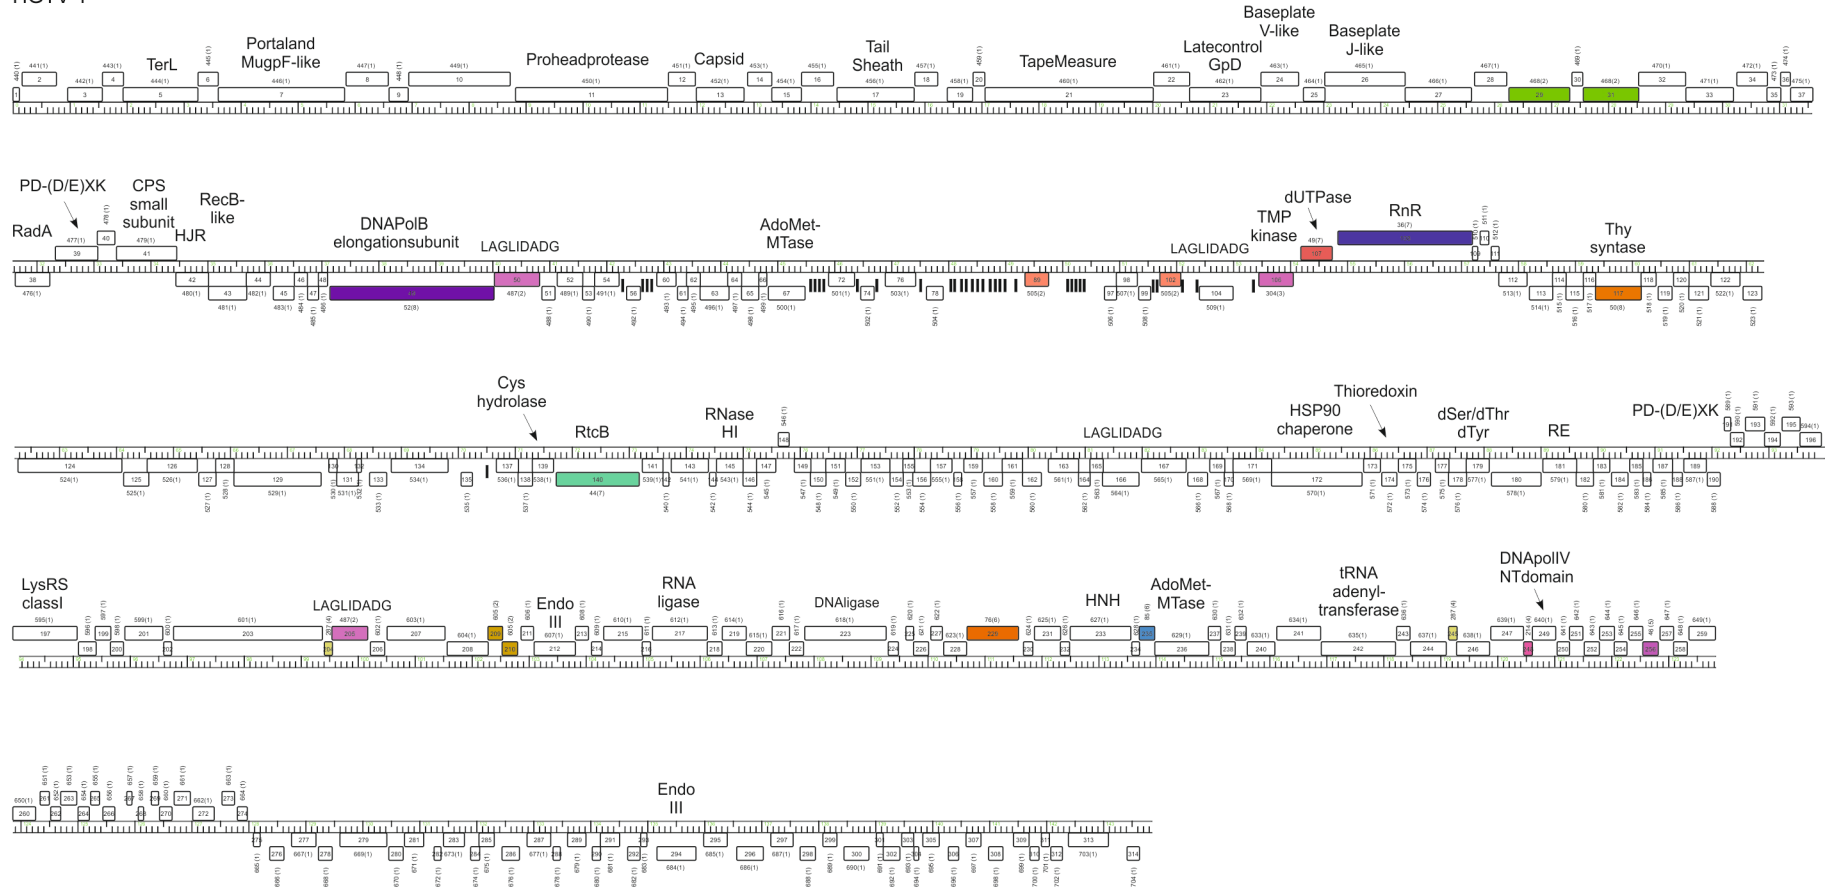

**Figure S7.** Genome map of HGTV-1. Pham and the number of the pham members are outlined above each ORF. TerL – terminase large subunit; AdoMet-MTase – S-adenosylmethionine-dependent methyltransferase; CPS – Carbamoyl phosphate synthase; dSer/dThr dTyr – Ser/thr and Tyr protein phosphatase; Endo III – endonuclease III; HJR – Holliday junction resolvase; HHN – Homing endonuclease; PD-(D/E)XK – nuclease; LAGLIDADG – endonuclease; LysRS classI – class I lysyl tRNA synthase; RadA – DNA dependent ATPase; RE – restriction endonuclease EcoRV; RecB-like – nuclease; RtcB – RNA ligase; RnR – ribonucleotide reductase; TMP – thymidine monophosphate.

# HHTV-1

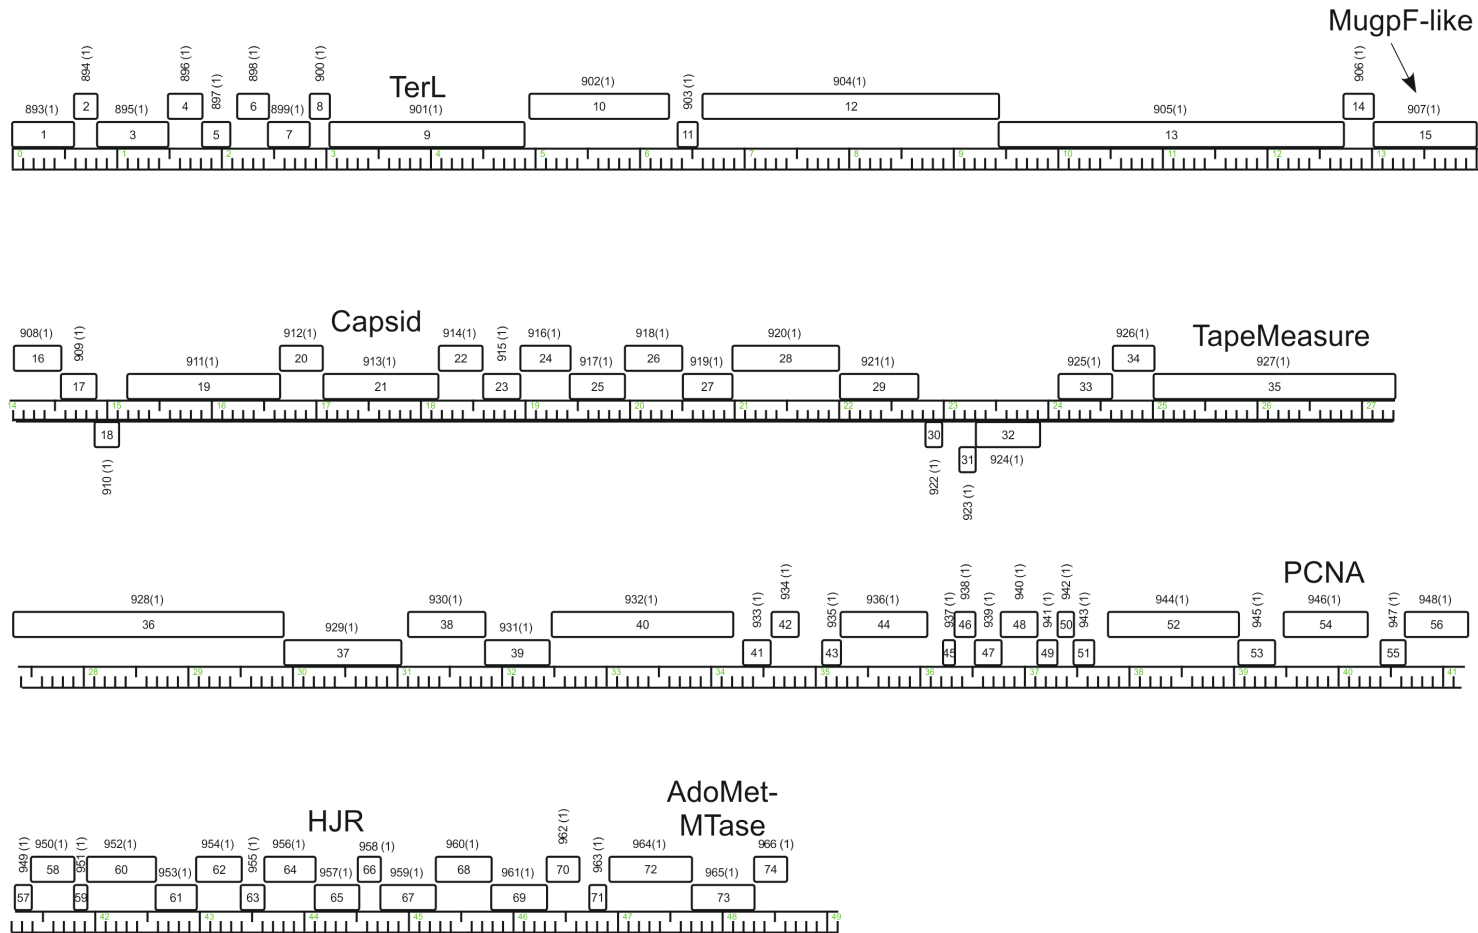

**Figure S8.** Genome map of HHTV-1. Pham and the number of the pham members are outlined above each ORF. TerL – terminase large subunit; AdoMet-MTase – S-adenosylmethionine-dependent methyltransferase; HJR – Holliday junction resolvase; PCNA – proliferating cell nuclear antigen.

## HRTV-4

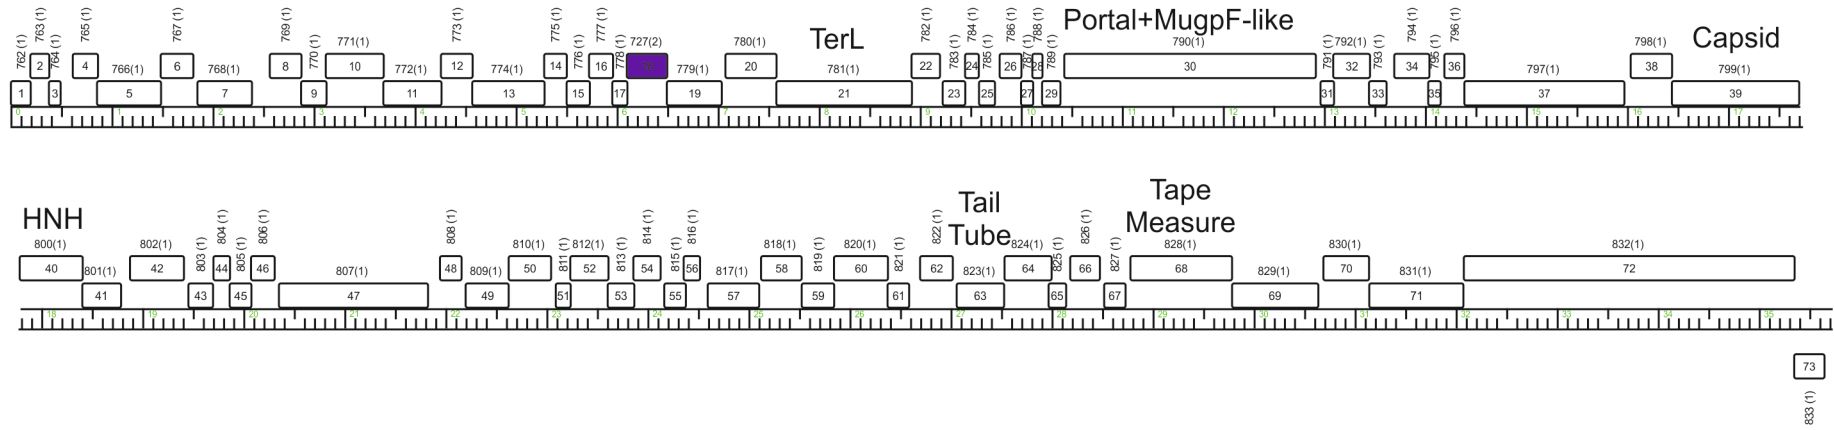

**Figure S9.** Genome map of HRTV-4. Pham and the number of the pham members are outlined above each ORF. TerL – terminase large subunit; AdoMet-MTase – S-adenosylmethionine-dependent methyltransferase; HNH – Homing endonuclease.



```

>ORF276 (128730-128680)
CCTTTT-TATAGTGGTATACTCCTCGTGGCACGGGGAGTGCTTAAGTAT-ATA
>ORF279 (130452-130402)
CCTTTT-TATAGTGGTATACTCCTCGTGGCACGAGGAGTCTTTTGGTAC-TTA
>ORF283 (131885-131835)
CCTTT--TATAGTGGTATACTCCTCGTGGCATGAGTATCGTTTAGGTATATAA
>ORF285 (132411-132361)
CCTTTT-TATACCCGTATACTCCTCGTGGCAAGGGGAGACTTATGGTAT-ATA
>ORF286 (132866-132816)
CCTTTT-TATAGTGATTTACTCCTCGTGGCAAGGGGAGTCTTTTGGTAC-TTA
>ORF288 (133579-133529)
TCTTTT-TATAGTGGTATACTCCTCGTG-CATGGGGAGTGTTATGGTACTTAA
>ORF289 (134022-133972)
CCTTTT-TATACCCTTACGCTCCTCGTGGCATGAGTATCGTTTAGGTAT-ATA
>ORF291 (134593-134543)
CCTTT--TATACCCGTATACTCCTCGTGGCACGGGGAGTCTTTGGTACTTAAA
>ORF293 (135102-135052)
CCTTTT-TATAGGGTTTACTCCTCGTGGCACGGGGAGGCTTTACCTAT-ATA
>ORF294 (135956-135906)
TCTTTT-TATAGGGTATACTCCTCGTGGCACGAGGAGGATTATGGTAT-ATA
>ORF295 (136549-136499)
ACTTTTATATAGGGTTTACTCCTCGTGACATGGCGAGGATTATGGTAT--AT
>ORF296 (137144-137094)
CCTTTT-TATAGTGGTATACTCCTCGTG-CAAGACGAGCGTTATGGTATATAA
>ORF297 (137668-137618)
TCTTTT-TATAGTGGTATACTTCCCGTGGCACGAGGAGCGTTATGGTAC-TTA
>ORF298 (138056-138006)
CCTTTT-TATAGTGGTATACTCCTCGTGGCACGACGAGTATTATAGTAT-ATA
>ORF299 (138435-138385)
CCTTTT-TATATGGGTTTACTCCTCGTGGCACGAGGAGTATTATGATAT-ATA
>ORF300 (139002-138952)
CTTTTA-TATAGTGTTATGCTCCGCATGGCACGAGGAGGATTATGGTAC-TTA
>ORF302 (139454-139404)
CCTTTT-TATAGGGTTTACTCCTCGTGGCACGAGGAGGATTACCCTAC-TTA
>ORF304 (139785-139735)
GGTTT-ATATAGGGGATTACTCCTCGTGGCACGACGAGCGTTATGGTAT-ATA
>ORF305 (140257-140207)
ACTTTTATATAGGGTTTACTCCTCGTGGCATGAGGAGTCTTTTGGTAT--AT
>ORF306 (140575-140525)
ACTTTTATATAGGGTTTACTCCTCGTGGCACGAGGAGGATTACCCTAC--TT
>ORF308 (141350-141300)
GGATTTATATAGGGTTTGTCTCCCGTGGCACGAGGAGTGTATGATAC--AT
>ORF309 (141808-141758)
GCTTTTATATAGGTGTTTGTCTCCCGTGGCACGAGGAGTATTATGGTAT--AT
>ORF311 (142166-142116)
AGTTTA-TATACCCGAATACTCCCCATGGCACGAGGAGGAAACACCTAT-ATA

```

**Figure S10.** Alignment of the repeat sequences in HGTV-1 genome. The header of the sequence indicates the ORF upstream of which the repeat is found. The nucleotide positions of the repeat are indicated in brackets. Hyphens in the sequences represent gaps in the alignment.
